# Supplementary material for: Phenotypic heterogeneity and evolution of melanoma cells associated with targeted therapy resistance
Source: PLoS Comput Biol. 2019 Jun 5;15(6):e1007034. doi: 10.1371/journal.pcbi.1007034 (PMC6576794; doi:10.1371/journal.pcbi.1007034)
Supplement: S1 Table — (XLSX) [file pcbi.1007034.s013.xlsx]

## Sheet: Sheet1
tracking_id	M397_0d	M397_0d_NGFR_neg	M397_3d	M397_11d	M397_21d	M397_21d_NGFR_pos	M397_73d	M397_73d_NGFR_neg	M229_0d	M229_3d	M229_21d	M229_90d
1060P11.3	0	0	0	0	0	0	0	0	0	0	0	0
A1BG	2.34087	1.99877	7.41424	4.48073	4.85263	3.5068	2.47428	3.714	6.24062	7.07805	8.829	11.1305
A1BG-AS1	0.650903	0.576974	1.28196	1.13448	0.934333	1.10279	1.26226	1.20483	0.712128	1.08402	1.42614	1.18186
A1CF	0.00575232	0.00582752	0	0.00682212	0	0.00615581	0.0137398	0.00608484	0	0	0	0.0129751
A2M	28.3542	24.823	185.902	217.081	179.344	144.328	298.553	262.244	42.2462	34.844	3.71718	0.529278
A2M-AS1	0.105365	0.0800556	0.177873	0.124937	0.219994	0.25368	0.251482	0.250758	0.469339	0.622143	1.01	0.455196
A2ML1	0	0.029521	0.0327959	0.103661	0.0304216	0.0155909	0.0869401	0.0770575	0.0683181	0.0397072	0.23943	0.153262
A2MP1	0	0	0	0	0	0.056062	0	0.0554162	0	0	0	0.0787273
A4GALT	0.304335	0.308307	0	0.0328058	0.115532	0.0296049	2.93851	3.07271	3.00962	1.65875	0.697111	4.57314
A4GNT	0	0	0	0	0	0.0356695	0.079561	0.0705171	0.0625196	0	0	0
AA06	0	0	0	0	0	0	0	0	0	0	0	0
AAAS	44.5358	48.1624	32.1317	28.1164	30.8944	26.6865	31.7097	30.4267	32.5187	39.819	25.3594	47.6849
AACS	8.17796	7.94517	12.5609	10.9488	11.5291	12.9649	13.6392	12.9396	7.9519	10.5496	15.6783	9.49356
AACSP1	1.24558	1.79879	1.07374	1.1627	0.470334	0.680598	0.695786	0.420474	0.273377	0.144445	0.435492	2.46904
AADAC	0	0	0	0	0	0	0	0	0	0	0	0
AADACL2	0	0	0	0	0	0	0	0	0	0	0	0
AADACL3	0	0	0	0	0	0	0	0	0	0	0	0
AADACL4	0	0	0	0	0	0	0	0	0	0	0.0417385	0
AADAT	10.2098	10.1386	2.99206	4.11555	3.83945	3.79345	1.70388	1.35421	8.20076	6.01583	3.72942	6.03093
AAED1	12.7389	9.69185	10.6519	13.2852	18.8534	17.5181	10.8065	8.33349	11.9461	12.3621	27.4627	10.3784
AAGAB	21.9656	20.7301	20.1817	17.0199	19.1334	16.269	24.5145	25.4085	23.1201	26.0421	25.7529	23.1286
AAK1	5.43657	5.4598	5.57701	5.64647	4.54148	5.07432	6.54117	5.97602	5.9681	5.32386	4.05929	5.98167
AAMDC	5.04919	6.34978	30.1763	22.0902	21.2663	17.6992	23.4791	24.3092	8.81684	33.6885	40.2459	39.2444
AAMP	85.4692	79.8912	50.4629	43.0715	52.9867	38.5877	58.0208	57.3364	53.9165	63.7249	53.7664	93.0389
AANAT	0.442754	0.59186	0.0715165	0	0.0638163	0.130823	0.540288	0.319838	0.0859884	0.0581421	0.139229	0.137785
AAR2	32.6923	33.1407	43.8678	37.345	40.9151	31.7794	32.227	32.8381	12.7524	23.6378	29.3029	18.7635
AARD	2.08015	2.1073	0.780359	0.743873	1.20644	1.6959	0.906276	1.0128	0.154817	0.0599877	0.253202	0.818654
AARS	106.466	102.042	76.9476	90.6772	103.957	85.1409	100.909	95.5621	124.13	116.39	134.348	113.788
AARS2	21.8844	23.1064	10.4143	8.15822	7.58768	7.15467	7.84311	7.72396	15.3758	14.5005	10.7373	10.8874
AARSD1	25.6221	24.5879	19.3084	18.1006	18.5497	16.4309	20.5495	18.1471	14.7142	14.6061	14.3009	37.0127
AASDH	1.78887	1.57585	2.1183	2.39782	1.9487	2.62993	1.68928	2.30347	3.20922	3.26416	3.16964	2.2089
AASDHPPT	15.9831	13.3437	7.65539	8.08893	6.60859	6.62653	5.88874	6.46702	26.2897	17.4122	18.0695	10.1475
AASS	3.10627	3.49232	3.24695	3.4428	2.87716	5.62199	3.25597	3.06135	9.87987	9.89704	8.39123	7.05001
AATF	71.0309	72.4225	41.5182	36.0688	44.8748	35.8969	42.9949	38.1076	35.7329	46.25	43.0729	63.7618
AATK	0.342127	0.28155	2.5146	4.05645	5.56903	8.03068	0.90579	0.135656	11.5292	44.1	41.9048	9.65483
AATK-AS1	0	0	0.0428534	0	0	0.0407514	0	0	0	0	0	0
ABAT	0.0226563	0	1.95107	1.86753	1.30118	2.04947	0.71666	0.407482	0.850049	2.61441	6.28097	0.280898
ABCA1	1.50635	1.43352	1.5526	1.02237	0.87894	0.873775	3.67397	3.41728	5.29369	1.63559	0.977903	0.11432
ABCA10	0.0596779	0.0518201	0.143922	0.262833	0.0890016	0.145962	0.0406962	0.0360702	0.127918	0.0387225	0.102736	0.076865
ABCA11P	1.69895	1.45057	1.67125	1.5607	1.4331	1.47117	1.71192	1.62739	2.46578	2.9461	2.04567	1.92101
ABCA12	0.0132555	0.00594841	0.029837	0.0235768	0	0.0212765	0.11082	0.0841267	0	0	0	0.014939
ABCA13	0.0953647	0.0592123	0.0346216	0.0364768	0.0353266	0.0592521	0.0513964	0.0813466	0.271174	0.0363285	0.0370709	0.235754
ABCA17P	0	0	0	0.0310931	0.0273751	0.0561188	0.04694	0.0554723	0.0122953	0.0476411	0.0430903	0.128062
ABCA2	9.31692	9.80463	14.9002	15.9246	13.2864	12.817	13.0475	13.135	12.7421	13.513	13.7769	5.54877
ABCA3	0	0	0.0366334	0.096491	0.492727	0.914303	1.04881	1.36857	1.16757	3.65175	9.45858	0.599176
ABCA4	0	0	0	0	0	0.00784813	0.00875266	0.00775773	0.0619012	0	0.0160696	0.0110211
ABCA5	1.25611	1.21492	1.95004	2.15775	1.0395	1.54641	0.39974	0.519906	2.58937	2.70417	2.33242	1.31474
ABCA6	0.0923245	0.0727453	0.173176	0.0851459	0.0428368	0.0987921	0.0612101	0.0217009	0	0.0372746	0.044952	0.0154148
ABCA7	1.96622	2.34387	5.88318	6.02054	3.42933	2.92358	6.05931	8.10174	3.89506	3.98829	3.86684	4.86496
ABCA8	0.132553	0.182241	0.990978	1.40333	1.5024	3.15083	0.124289	0.0300438	0.266364	0.232221	2.40637	0.960343
ABCA9	0.137078	0.147546	0.395323	0.274285	0.134159	0.201686	0.122689	0.163115	0.0803419	0.179	0.159555	0.502081
ABCB1	5.34854	4.92578	0.58631	0.453001	0.918523	0.768053	0.911837	0.367357	1.48734	0.630991	0.342432	0.434907
ABCB10	8.62244	9.1261	4.86005	4.52705	6.29953	6.5641	3.29343	2.64682	4.89441	8.57304	5.15375	0.569405
ABCB11	0	0	0	0	0	0	0.0136374	0.0120872	0	0	0	0
ABCB4	0.483168	0.511342	1.36337	2.12893	1.77652	2.29934	1.01542	0.411858	3.24503	1.53676	0.765152	0.270882
ABCB5	2.64255	2.40317	9.24521	3.9498	3.83965	1.65691	2.23117	1.14857	3.60754	6.40529	2.99058	3.68431
ABCB6	34.8048	36.5566	21.4133	24.6737	23.0411	20.1013	17.8547	19.9483	15.1096	22.7472	20.6404	34.4762
ABCB7	6.02987	6.20554	6.75931	4.48287	4.8461	5.63295	7.11026	5.99831	16.8068	14.1286	10.5116	7.11927
ABCB8	10.9042	10.1959	10.6576	10.7032	14.342	11.9551	13.7087	13.606	14.633	18.1263	10.9746	13.1609
ABCB9	5.95902	6.80108	3.36034	4.64338	3.99292	3.47042	4.84135	5.34468	6.04078	8.63022	5.62331	6.72988
ABCC1	12.0322	12.8216	9.12313	13.3322	12.6211	14.457	12.4771	11.5453	20.1021	11.982	16.8253	10.7927
ABCC10	7.3848	7.84554	9.9197	9.35744	6.91511	7.15785	8.3804	9.37489	4.60674	6.10566	3.8434	3.48216
ABCC11	0.0245306	0.0476347	0.138059	0.043634	0.0498896	0.0525032	0.0268053	0.0389227	0.0690201	0.0780025	0.134387	0.00921249
ABCC12	0	0	0	0	0.0219707	0.0225199	0	0.0222605	0	0	0	0
ABCC13	0.0594706	0	0.111551	0.070517	0.0413899	0.0424245	0.094628	0.146775	0.0371797	0.0180077	0.0217168	0.0595763
ABCC2	21.7476	22.7848	20.6308	15.5131	15.8632	8.39511	22.0306	25.5335	1.63719	1.77193	0.661139	5.23064
ABCC3	0.010527	0	0.567104	3.31948	4.01811	1.99282	8.71323	12.0115	0	0.0282653	0.0340414	0.183185
ABCC4	17.1665	17.7913	13.8139	10.2817	10.1544	5.92883	8.17505	7.98227	11.8577	7.46121	4.59078	2.49152
ABCC5	11.8238	12.8263	11.8939	12.1581	9.2096	14.2599	9.09687	9.26787	25.615	19.1525	14.4494	16.4551
ABCC5-AS1	0	0	0	0	0	0	0	0	0	0	0	0.592365
ABCC6	0	0.102949	0.174198	0.120383	0.161586	0.125145	0.57952	0.568136	0.00997037	0.00965816	0	0.0878701
ABCC6P1	0	0.0209655	0	0.0490788	0.021605	0	0.345763	0.30646	0	0	0	0
ABCC6P2	0.208103	0.10541	0.234207	0.123379	0.434502	0.445363	0.496693	0.660349	0	0	0	0
ABCC8	0	0	0	0.0129739	0.0114226	0.0117081	0	0	0	0	0	0
ABCC9	0.475976	0.508254	0.412619	0.70167	0.389462	0.86722	0.729216	0.761983	1.06763	0.409006	0.458017	1.30965
ABCD1	13.9042	13.3516	14.8327	9.46963	11.2215	7.23718	17.2236	17.0861	38.7486	27.9492	28.0662	14.6435
ABCD2	0.0203368	0.0206023	0.0915512	0.0482286	0.0212308	0.0217615	0.0242696	0.053777	0.0667493	0.027711	0.0111396	0.00763987
ABCD3	14.9596	13.5035	9.74549	11.6834	11.1228	16.5749	12.7604	14.8112	16.4466	15.5305	22.9538	10.299
ABCD4	3.73429	3.70233	6.33527	5.74571	6.20197	7.05969	5.62886	5.46335	5.91019	6.06359	7.73218	7.1628
ABCE1	25.6732	24.5902	8.66367	9.12762	12.5606	11.4036	11.0143	12.2838	36.5859	21.2646	21.4276	19.6532
ABCF1	77.659	75.2258	49.5209	48.7151	49.7989	42.8038	39.3966	35.2839	34.9609	40.6062	37.9116	70.0041
ABCF2	71.565	68.5947	41.3608	37.2345	50.0372	38.8195	55.0918	50.7035	62.5015	66.4897	70.0896	49.3528
ABCF3	23.4705	24.6707	22.8396	22.7034	21.8309	19.8981	21.2964	21.8621	35.5591	46.3683	43.8603	50.5987
ABCG1	0.0192111	0	0.0216209	0.0227795	0.0601527	0.123328	0.111674	0	0.0360171	0.0516557	0.0420918	0
ABCG2	0.407799	0.438158	0.278174	0.43959	2.01713	1.64681	2.19737	1.73848	0.336069	0.224512	1.05811	0.723636
ABCG4	0.15327	0.0310523	0.482889	0.27261	0.352019	0.295643	0.292655	0.259389	0.172478	0.0696141	0.0335799	0.173421
ABCG5	0	0	0	0.0244233	0	0	0	0	0.0772623	0	0.0225646	0.0154755
ABCG8	0	0	0	0.0503351	0	0	0	0.0224504	0	0.0192809	0	0
ABHD1	0.0841139	0.0852119	0.141997	0.249344	0.0439057	0.270019	0.20076	0.311393	0.354957	0.152819	0.184295	0.284389
ABHD10	13.3371	12.7304	12.1429	7.61525	8.24672	7.53656	8.40517	8.49134	18.7305	18.1439	17.4955	9.65063
ABHD11	7.67992	8.53334	9.80917	8.6467	8.74232	7.42608	9.92458	9.71361	24.7186	17.4432	14.2932	31.5273
ABHD11-AS1	1.16504	0.786834	3.93355	2.53265	2.2298	2.07776	3.47585	2.87536	0.18209	0.705552	2.55262	0.729446
ABHD12	40.209	37.4406	40.2773	38.7869	49.1802	44.8982	63.4253	58.552	21.971	26.4146	35.6517	24.8081
ABHD12B	0.0820635	0	0.0923574	0.291925	0.0428344	0.13172	0.0489654	0.0433995	0.115436	0.0745466	0.152194	0
ABHD13	1.70087	1.77497	2.07566	1.9439	2.12862	2.44497	2.45775	2.87199	2.70961	2.45723	2.60415	1.24713
ABHD14A	10.1739	9.72287	15.0119	13.4192	14.0581	7.682	16.9428	15.4153	7.3651	11.9582	19.7625	10.7888
ABHD14A-ACY1	2.13503	4.81166	2.84526	0.0322089	3.76712	4.54331	1.72083	4.39117	1.66788	3.41869	1.43607	0.901173
ABHD14B	22.5177	21.6427	49.1533	25.2956	27.4367	19.9963	27.1816	24.6757	14.3518	24.6182	18.288	21.6107
ABHD15	3.07362	3.24767	5.70949	5.01613	5.15812	4.89804	6.05417	5.47086	9.74728	11.3485	12.4911	9.59731
ABHD16A	25.4103	25.161	34.1328	34.2437	37.3271	31.8784	38.7853	37.9964	15.9675	19.9285	24.2216	14.7457
ABHD16B	0.465196	0.639578	0.523548	0.945606	1.14473	1.17335	0.39654	0.667782	2.27471	2.53551	2.1113	3.66993
ABHD2	26.9599	27.2186	41.0162	87.4581	73.1778	105.665	44.6033	44.0141	21.7685	16.7648	36.2037	6.67086
ABHD3	5.53241	5.63307	1.13781	1.63168	3.28359	4.41744	2.88221	1.84167	12.009	6.0716	4.12257	4.95848
ABHD4	2.92335	3.62727	10.8648	11.5813	13.2483	12.755	15.9289	14.7174	7.96924	16.6334	37.4623	18.9504
ABHD5	3.84485	3.79226	2.44329	2.10508	2.79593	2.50759	3.57142	3.30494	2.81596	3.83364	4.01201	2.60674
ABHD6	7.54054	8.04993	12.5685	13.8645	14.4735	11.1329	8.57158	7.69819	6.10905	7.04494	8.26071	1.73908
ABHD8	2.76961	2.94605	5.17426	6.46959	7.34405	6.75708	10.2461	10.136	11.324	12.8312	10.8015	7.09588
ABI1	14.9709	15.051	31.4232	25.736	23.7651	20.8638	17.7871	17.5976	10.202	16.2507	12.7355	6.01949
ABI2	8.69754	8.1787	6.73488	5.97072	7.01191	8.9773	10.3099	10.0007	16.6403	14.1989	9.26379	10.2305
ABI3	0	0	0.0311222	0.0656167	0.144462	0.0592115	0	0.116011	0	0	0	0
ABI3BP	0.232482	0.309891	0.660996	4.52671	7.19164	7.34522	8.98029	8.28304	0.0114744	0.0222303	0.0134045	0.588368
ABL1	21.7304	22.3286	37.899	41.7908	34.116	30.1888	41.5383	43.8641	14.0904	23.3122	23.9899	15.1483
ABL2	16.8708	17.9181	23.4702	31.9549	24.0671	35.2338	11.712	8.66367	9.42453	11.4432	22.7338	16.7583
ABLIM1	4.88891	5.19646	5.46203	7.074	6.60672	7.92652	12.6541	13.8383	9.25917	1.49863	11.797	1.62601
ABLIM2	0	0	0.0247729	0	0.0229794	0.0526302	0	0.0232824	0	0	0.0359156	0.0288429
ABLIM3	3.37613	2.48509	44.2435	37.7682	38.9943	40.8349	28.0672	25.6792	1.28064	4.30742	40.5596	18.6872
ABO	0	0	0	0	0	0	0	0	0	0	0	0
ABP1	0	0	0	0	0.0735581	0.0502646	0	0	0.0220253	0	1.46662	0.105879
ABR	40.7805	43.8435	46.1651	48.8265	43.9138	40.388	29.7136	26.5823	18.809	21.7316	30.0635	24.3191
ABRA	0	0	0	0	0	0	0	0.0216668	0	0	0	0
ABRACL	40.1739	35.9103	37.7846	28.1178	32.9224	21.8865	24.02	23.4444	26.8225	21.097	17.0508	27.4289
ABT1	16.0001	15.3099	14.5541	12.8385	13.3945	9.49658	7.3835	8.34118	14.6239	14.2812	10.0003	12.974
ABTB1	4.15124	2.98039	14.6647	18.6339	16.0182	14.2202	9.63458	11.1172	10.1509	8.70081	10.6432	11.7372
ABTB2	10.805	10.5406	7.04347	3.32161	4.09652	2.49794	4.24508	4.40922	13.927	8.00772	6.02806	3.64147
ACAA1	31.9007	28.5001	57.9426	34.3199	35.5774	26.3183	35.1615	33.4718	13.4982	21.8135	24.2969	22.272
ACAA2	25.4532	23.7972	44.617	30.9686	36.2174	25.2008	35.9603	35.4176	34.204	42.8698	33.1765	36.3194
ACACA	17.3993	18.4284	13.231	15.3891	15.7483	15.4103	20.0992	18.7676	12.8892	12.5063	13.8639	6.02004
ACACB	0.993197	1.07636	4.0812	3.08113	2.58008	2.87937	2.50834	2.7668	3.9584	4.24359	3.8841	2.22565
ACAD10	2.75366	2.90821	8.3628	6.362	6.05747	5.65256	6.33754	6.60121	5.38597	6.9516	6.85734	5.38668
ACAD11	1.06655	1.38333	2.29885	3.75873	2.02902	4.33647	4.23999	5.05898	3.31066	2.77454	5.48686	6.47533
ACAD8	6.81666	6.69397	8.55352	7.40151	6.62552	5.98067	5.32974	6.90628	8.03341	9.96457	8.01132	7.35859
ACAD9	24.8967	24.8045	18.9379	17.4506	20.2078	16.6779	15.5743	15.9627	22.8916	28.5355	23.6161	23.6164
ACADL	0.662069	0.901991	0.565261	0.135353	0.166835	0.0488586	0.0817345	0.0241479	0	0	0.0250104	0.0171529
ACADM	17.8762	16.9505	12.9631	7.37789	11.82	8.97008	10.5236	10.1795	36.6648	32.5171	16.1963	10.9116
ACADS	5.58026	5.15884	16.5757	10.1963	11.3328	8.58152	6.25908	5.77337	8.37849	14.2656	19.8095	14.3878
ACADSB	2.30356	2.56422	2.66423	3.46557	2.9276	3.31255	3.07499	3.02399	4.79001	5.88893	4.24916	2.8458
ACADVL	49.5322	45.546	67.6781	79.1415	83.8333	78.1794	82.5326	87.9816	82.3986	97.462	97.2284	179.728
ACAN	50.3157	52.7249	592.382	937.529	461.404	593.999	24.2449	1.28447	0.83884	1.11347	1.7162	0.0454447
ACAP1	0.0226714	0.0459347	0.178607	0.134413	0.0946721	0.121298	0.216445	0.239802	0.0637816	0.0823791	0.124184	0.221439
ACAP2	10.5055	10.4072	7.98347	7.13981	7.46811	8.91454	8.6981	8.37562	18.2901	15.7079	16.2077	4.6649
ACAP3	14.7816	15.4955	16.1066	18.015	13.7287	14.9995	16.886	18.106	17.582	8.60916	12.8774	31.8052
ACAT1	14.6928	13.1608	15.3503	8.13448	10.2069	8.09222	7.63891	7.97044	58.5075	53.2896	32.7838	44.2581
ACAT2	24.5487	21.1746	14.6204	13.9784	19.5939	16.5664	16.3361	14.6841	21.8629	15.8167	9.26133	13.8394
ACBD3	15.3239	15.9648	18.558	19.5524	18.2041	19.5239	19.6783	16.2743	11.2514	11.0826	13.6547	5.69831
ACBD4	1.79425	1.51873	4.92215	5.42398	4.10697	4.6736	5.09581	5.68319	2.96919	3.54044	3.94974	7.23048
ACBD5	10.7541	10.952	9.2851	9.96425	9.9362	10.0891	8.80963	7.32473	9.53165	7.97679	7.91548	6.69553
ACBD6	22.455	21.2866	25.4799	24.2134	25.2186	21.9301	22.0736	19.9558	27.6143	25.6406	23.5865	29.7956
ACBD7	0.874434	0.601708	0.278525	0.899913	1.13678	2.40102	1.77204	2.14649	1.50078	1.69359	1.31944	2.98745
ACCS	1.96729	1.72002	5.20073	3.71488	2.04962	3.34202	1.78915	2.0226	0.771214	1.27566	0.930629	3.00192
ACCSL	0	0.0654909	1.38237	0.191637	0.3037	0	0	0	0	0.0293628	1.38102	0
ACD	12.5431	14.7258	11.0818	8.78405	9.81541	7.44455	10.1175	11.0748	12.4764	12.1273	8.42068	20.0622
ACE	0.0657735	0.033316	0.160387	0.493945	1.07575	0.668621	5.01046	5.89029	0	0.0930233	0.140516	0
ACE2	0	0.0160209	0	0	0	0	0	0	0.0148303	0.0718293	0.0519744	0.0237638
ACER1	0	0	0	0	0	0	0	0	0	0	0	0
ACER2	0.453703	0.519576	0.177605	0.280683	0.350087	0.506594	0.635604	0.751138	0.647451	0.26879	0.280933	0.103747
ACER3	9.02845	9.13364	10.0064	8.2919	12.88	6.06647	16.3329	19.7068	6.71003	6.22767	5.4994	2.72085
ACHE	0.350959	0.55743	1.49842	4.53669	3.77512	2.31207	4.95201	6.60743	1.07794	1.16169	10.499	2.71245
ACIN1	56.599	56.9514	40.6934	45.0414	41.1574	44.3144	51.6751	54.9352	42.5247	44.8586	36.2424	125.182
ACLY	115.04	114.946	102.905	87.2784	88.567	73.0859	102.75	94.4917	107.631	87.1362	62.6273	36.8521
ACMSD	0	0	0	0	0	0	0	0	0	0	0	0.0374481
ACN9	4.05927	4.22649	3.64842	2.44006	4.8557	3.25773	3.63319	3.63763	10.6005	8.91134	8.52333	8.28123
ACO1	16.0951	14.8977	12.2107	13.2723	15.2055	10.6911	16.6926	16.3803	44.3875	42.3169	29.2447	16.6438
ACO2	88.1967	88.0131	117.088	73.452	82.5598	49.8796	71.5257	58.1468	155.095	197.666	108.084	39.3851
ACOT1	0.560059	0.605194	1.84891	0.973994	1.24731	0.679198	1.4704	1.50072	0.805314	0.915765	0.613548	0.617159
ACOT11	0.141865	0.0876584	0.0650959	0.0685842	0.0919035	0.0617271	0.0209393	0.0371205	1.1117	1.3143	0.21145	0.0922812
ACOT12	0.0877898	0.0592905	0.461075	0.659276	0.244397	0.250506	0	0	0.548842	0.292411	0.769394	0.131919
ACOT13	3.04124	2.79366	7.11659	6.41832	7.24738	5.73502	6.67775	7.03253	11.2572	10.9551	9.60745	13.1141
ACOT2	6.04219	5.10688	7.18862	4.29301	5.76856	4.51818	8.12539	8.78027	3.67439	6.44721	5.24944	3.14527
ACOT4	1.42658	1.63048	1.8937	1.51807	1.4511	0.430556	0.742095	1.31548	0	0.0332284	0.0801451	0
ACOT6	0.130586	0	0.0734832	0	0	0	0	0	0	0	0	0
ACOT7	92.0656	92.3532	27.2622	30.5482	72.1298	52.1674	127.382	125.27	128.033	64.1652	64.3734	114.421
ACOT8	21.4448	19.7547	34.2872	24.6392	27.6883	15.3751	25.9786	26.7393	10.8403	16.7817	18.3447	18.0603
ACOT9	19.4178	19.3125	25.1031	22.3673	23.3765	18.9992	21.5658	20.1667	53.5821	39.6128	44.9262	56.91
ACOX1	5.90219	5.77493	7.90892	7.26701	7.21812	7.69724	7.62207	6.95342	7.77139	10.6301	13.0515	5.98856
ACOX2	0.347406	0.226248	0	0	0.103622	0.026553	0.0592267	0.0262472	0.162893	0.090167	0.924279	0.167797
ACOX3	4.96917	5.93213	7.83917	6.27551	6.33078	5.53735	8.0282	8.24099	5.47028	6.47506	6.90039	6.30739
ACOXL	0	0	0.0271033	0.0285557	0.0251411	0	0.0287396	0	0.112919	0.262519	0.10553	0
ACP1	33.5003	31.9578	29.9459	30.184	36.1685	30.6361	32.387	30.1323	71.9556	69.3833	88.0534	42.6378
ACP2	22.8642	21.8171	35.1429	37.1797	32.4349	22.7997	25.7889	27.351	25.3594	32.352	30.401	24.2331
ACP5	101.341	113.081	92.5315	94.6613	115.717	84.105	36.8061	25.4063	61.6232	46.2814	96.0124	83.0313
ACP6	7.06669	6.00426	3.33517	3.90004	6.93536	7.24811	6.14033	4.40899	11.1466	12.0401	14.0205	17.2495
ACPL2	4.79171	4.49312	6.22897	5.85566	7.00365	7.31875	5.49306	5.38202	5.96425	2.78219	3.04186	1.86218
ACPP	0.0346501	0	0.0389965	0	0.0335987	0	0.103377	0.0733007	4.24741	0.46854	0.0189797	0.265045
ACPT	0	0	0	0	0	0	0	0.0483377	0.0428556	0.0415137	0	0.0686713
ACR	0	0	0.100835	0.265596	0.18707	0.143809	0.0534613	0.0473842	0.126031	0.122084	0.245384	0.134633
ACRBP	0	0	0	0.0368236	0.226942	0.398769	0.111182	0.131392	0	0	0.102064	0.0699984
ACRC	0.210767	0.320277	0.355807	0.583137	0.348383	0.39468	0.251525	0.1672	0.131767	0.478653	0.596482	0.646621
ACRV1	0.137239	0.217947	0.0642919	0.135529	0.178984	0.0734469	0.136365	0	0.128698	0.259537	0.300697	1.54457
ACSBG1	0.340127	0.229696	0.446603	0.560172	0.552371	0.523505	0.473568	0.319784	0.194899	0.343303	0.144877	0.35493
ACSBG2	0	0.0210992	0	0	0	0.0445727	0.0745648	0	0.0585936	0	0.0228165	0.0469448
ACSF2	0.462029	0.338043	11.7285	4.65671	6.67235	2.63678	15.5304	17.1045	11.4577	17.2547	12.7945	18.4947
ACSF3	3.75665	3.3316	6.91652	5.30773	5.68297	5.22519	5.12189	5.78982	4.91845	7.99974	7.84309	9.7217
ACSL1	14.8684	14.6069	8.55444	10.3717	9.94918	9.26657	11.7367	12.2284	31.2461	13.8491	14.3973	3.05162
ACSL3	47.3087	48.3902	31.7334	31.7387	30.0637	32.5682	50.9129	51.9935	94.3933	28.5287	22.5367	16.2792
ACSL4	11.2527	10.8708	9.91838	9.97666	10.1396	9.56921	17.686	18.1039	26.269	12.8512	9.14358	5.15516
ACSL5	0.086737	0.105444	0.465607	1.29776	2.64866	0.585582	35.692	43.4224	0.0488019	0	0.0570114	0.31263
ACSL6	0.469994	0.543605	0.287746	0.382042	0.413247	0.326544	0.26568	0.199359	0.0642699	0.0466921	0.0938523	0.450582
ACSM1	0	0	0	0.033534	0	0	0	0	0	0	0	0
ACSM2A	0	0	0	0	0	0.0202515	0	0	0	0	0	0
ACSM2B	0	0	0	0	0	0	0	0	0	0	0	0
ACSM3	0.108315	0	0.215337	0.271597	0.239593	0.260781	0.775804	0.700454	0.390584	0.0347621	0.041922	0.143757
ACSM4	0.0678815	0.103151	0.114595	0.201225	0.177164	0.181592	0.445547	0.3949	0	0	0	0.127504
ACSM5	0	0.0237935	0	0	0	0	0	0.0248428	0	0	0	0
ACSS1	26.7072	26.9469	26.7481	17.4468	18.2202	19.4837	8.46262	6.34634	0.909788	0.921622	1.28133	1.5002
ACSS2	14.6637	16.0753	11.9481	11.584	12.3829	9.32581	26.0674	29.4088	20.5118	10.9093	12.1253	7.90679
ACSS3	0	0	0	0.0218938	0.0192758	0	0	0.05859	0.242411	0.0335457	0	0.0277454
ACTA1	0.0405235	0.0410524	0.0912132	0.096101	0.211524	0.0433623	0.290159	0.171451	0.0380016	0.0736232	0.133181	0.213126
ACTA2	0	0	0.0491928	0	0.0912637	0	0	0	0.0819817	0.305343	1.86708	13.4975
ACTB	3137.83	3114.48	2871.42	3251.78	3565.23	3317.01	4864.34	4830.1	2115.73	3346.66	2746.81	2988.68
ACTBL2	0	0.0408624	0.0226978	0	0.0210545	0	0.024068	0	0.453909	0.0732825	0.0441883	0
ACTC1	0	0	0	0	0	0	0.035733	0	0	0	0.196815	0
ACTG1	1584.97	1589.98	1787.49	1546.95	1925.08	1477.48	2358.98	2233.01	1575.2	2466.62	1682.94	1815.67
ACTG1P4	0.0585593	0.0296618	0.0329524	0.173591	0.0917001	0.187985	0.0349417	0	0.0823725	0.132989	0.0641521	0.0219988
ACTG2	0.0523356	0.328725	0.260816	0.744729	0.982671	0.392037	3.87306	0.830406	0.392653	1.28371	0.802938	0.550804
ACTL10	0.400926	0.754296	0.515676	0.475396	0.358757	0.183862	0.444281	0.575523	0.375975	0.442245	0.345099	0.64549
ACTL6A	67.9869	67.6826	42.6171	34.9807	46.972	37.0802	37.1302	38.1198	67.3376	58.4728	37.1897	39.6909
ACTL6B	0	0	0	0	0.0409084	0	0	0	0	0	0	0
ACTL7A	0	0	0	0	0	0.0454792	0	0	0	0	0	0
ACTL7B	0	0	0	0	0	0	0	0	0.0406844	0	0	0.0325961
ACTL8	0.409809	0.447093	0.212868	0	0.0987284	0.0337321	0.112859	0	76.9498	66.3502	31.1156	111.911
ACTL9	0	0	0	0	0	0	0	0	0	0	0	0
ACTN1	123.349	119.611	54.5943	78.8083	90.5914	69.3472	194.646	198.388	70.8875	27.7955	21.8444	48.1521
ACTN2	0.797298	0.905609	0.0815735	0.17189	0.176558	0.271457	0.0288327	0.0383329	0.74768	0.142659	0.0794041	0.299518
ACTN3	0.0191057	0	0	0.045309	0.0398911	0	0	0.0202086	0	0	0	0.0430643
ACTN4	260.283	259.631	224.896	307.375	309.985	310.862	290.32	259.692	234.772	160.256	131.172	151.238
ACTR10	13.0938	13.8085	20.0948	17.2694	17.0806	16.983	17.7705	18.6143	19.5455	23.6616	22.3474	20.7803
ACTR1A	61.0616	58.3493	86.4077	75.8844	82.3586	65.6113	71.118	69.1199	40.3584	64.9265	71.31	73.4188
ACTR1B	23.8541	22.4136	21.2366	22.9174	27.3452	24.4095	19.6052	21.4922	22.2504	21.0223	35.5211	12.859
ACTR2	102.192	101.148	80.4508	88.1463	87.25	91.8382	97.4225	95.1527	76.885	77.4918	85.6279	31.2594
ACTR3	97.9719	96.0225	74.9841	73.1494	89.4502	68.8872	123.728	119.401	106.992	93.8224	89.6232	46.6475
ACTR3B	2.42183	2.22818	1.11146	2.16769	2.14402	2.01329	1.41445	1.72509	17.8756	23.6144	34.5112	16.0175
ACTR3BP2	0	0	0	0	0	0	0	0	0	0	0	0
ACTR3BP5	0	0	0	0	0	0	0	0	0	0	0	0
ACTR3C	0.463164	0.442111	0.436671	0.690135	0.405056	0.622808	0.491316	0.992364	0.0909637	0.0440581	0	0.115989
ACTR5	7.69175	7.48976	4.78049	4.05656	4.38646	4.07843	5.2335	4.95431	3.07901	3.2746	3.11901	4.86476
ACTR6	3.1951	2.81652	2.63769	2.41089	2.42788	4.42169	3.73629	3.32376	7.70803	4.29305	4.66952	4.82315
ACTR8	12.4144	12.9627	20.3395	16.6915	15.3324	14.557	13.1043	12.3245	7.06519	8.5203	7.93616	4.31992
ACTRT1	0	0	0	0	0	0	0	0	0	0	0	0
ACTRT2	0	0	0	0	0	0	0	0	0	0	0	0
ACTRT3	0.406046	0.146909	0.261131	0.343905	0.242226	0.24828	0.415343	0.582873	0.543967	0.816746	0.762559	0.348658
ACVR1	15.7491	14.2438	14.7852	18.582	18.6144	18.6187	21.349	22.9932	23.0195	17.5531	18.8236	8.46885
ACVR1B	6.38343	6.67811	8.16589	6.89498	7.13193	6.47602	8.42163	8.15318	8.55884	7.59268	7.23279	4.51379
ACVR1C	0.29911	0.286797	0.359287	0.108569	0.122875	0.064454	0.0456044	0.0134719	1.78495	0.426793	0.140431	0.0837755
ACVR2A	1.03641	1.02894	1.13142	1.29037	1.01705	1.10902	1.17499	1.35934	2.00215	2.08067	1.69175	1.19918
ACVR2B	1.74912	1.753	1.05795	1.06474	0.790946	1.30616	0.747881	0.766751	1.97359	1.29577	0.983706	0.520048
ACVR2B-AS1	0.112916	0.183024	0.050832	0.187446	0.0943037	0.193322	0.134752	0.143321	0.1906	0.164117	0.1237	0.220578
ACVRL1	0.0799073	0.0391109	1.53545	0.917317	0.443345	0.427541	0.143043	0.0422583	0.0749342	0.0362919	0.0145869	0.110069
ACY1	25.0001	19.6374	45.2551	22.1977	27.9401	11.1923	18.5581	13.6892	21.4636	17.3052	14.6269	18.323
ACY3	0.142978	0.0482815	0	0.282559	0.248772	0.152994	0.511882	0.85698	0	0	0	0
ACYP1	10.0216	10.4916	5.9782	3.39939	6.69898	3.98253	7.04518	7.73756	14.3641	10.0689	4.21786	18.9578
ACYP2	2.86778	2.85334	7.83823	6.92236	7.05692	4.9866	7.45584	8.01666	2.01698	3.16334	5.44183	2.88571
ADA	11.2887	12.3924	11.1553	11.1002	18.6423	7.49181	22.0617	21.0932	19.4387	16.972	19.132	27.6611
ADAD1	0	0	0	0	0	0	0	0	0	0	0	0.0230672
ADAD2	0	0.02854	0	0	0.0294107	0	0	0.0297985	0	0	0	0
ADAL	8.26142	9.61343	7.15919	8.0206	7.64203	8.02531	6.36112	6.71849	13.9222	16.3794	13.419	13.1916
ADAM10	34.3043	33.8708	42.318	42.5228	46.1091	52.2611	58.0667	57.521	55.063	53.479	69.3357	11.954
ADAM11	1.05764	1.37398	0.924241	1.23934	1.61074	1.49123	0.460321	0.289545	1.35355	0.983372	36.8452	1.83235
ADAM12	1.17829	1.10525	1.57823	8.20305	14.0198	23.4519	17.6541	20.3748	13.3268	7.56744	7.79095	7.82378
ADAM15	47.4099	46.514	32.9373	38.6714	49.1774	41.4183	44.4751	40.8464	41.9982	46.6001	61.2895	41.8508
ADAM17	12.0972	12.6479	11.3979	18.3348	19.0892	23.0348	17.0092	16.0436	22.3687	21.8655	30.0221	7.97038
ADAM18	0	0	0	0	0	0	0	0	0	0	0	0
ADAM19	8.18021	7.41867	30.3724	56.2046	45.8264	73.6413	12.3938	11.1786	9.02899	19.7755	85.1385	7.62162
ADAM1A	0.990801	0.983659	0.825162	1.90324	0.434429	1.92958	0.733089	0.586878	0.483153	0.39602	1.0203	0.967748
ADAM2	0	0	0	0	0	0	0	0	0	0	0	0
ADAM20	0	0	0.0227153	0.0239325	0	0	0	0	0.0378549	0	0	0.0151646
ADAM20P1	0	0	0.0207362	0	0	0.0197158	0	0	0	0	0	0.0553734
ADAM21	0.0212337	0.0215109	0.26287	0.276956	0.46551	0.318097	0.0253399	0.0898379	0.0398246	0.0385776	0.0697851	0.0319072
ADAM21P1	0	0	0	0.0335703	0.118224	0.151475	0	0.0299459	0	0	0	0
ADAM22	1.15888	1.2035	1.76186	2.53023	3.33145	5.56717	1.69812	1.65583	5.88462	5.04183	24.6639	1.73528
ADAM23	13.2419	14.6393	52.3973	28.8622	22.5237	24.4978	2.75399	0.329333	0.446561	1.34765	7.8452	17.5588
ADAM28	0	0	0	0	0	0	0	0	0	0	0	0.143138
ADAM29	0	0	0.0200307	0	0	0	0	0	0	0	0	0.0130121
ADAM30	0	0	0	0	0	0	0	0	0	0	0	0
ADAM32	0	0.0209738	0	0	0	0	0	0.0218987	0	0.0188071	0.0453617	0.171108
ADAM33	0.0161297	0	0	0.114799	0.151609	0.202333	0.112826	0.0511988	0.0151255	0.0146517	0	0
ADAM3A	0	0	0	0	0	0	0	0	0	0	0	0
ADAM5	0	0	0	0	0	0	0	0	0	0	0	0
ADAM6	0	0	0	0	0	0	0	0	0	0	0	0
ADAM7	0	0	0	0	0	0	0	0	0	0	0	0
ADAM8	0.0369889	0	0.0802527	0.126831	0.057925	0.0381501	0.469447	0.697698	0.017341	0.0161918	0.0995319	0.629539
ADAM9	27.8677	29.3319	45.4602	66.5764	57.3873	61.0317	69.3302	73.6493	102.282	72.7412	41.6508	12.3129
ADAMDEC1	0	0	0	0	0	0	0	0	0	0	0	0.0387572
ADAMTS1	11.7579	13.3512	5.08953	14.1926	15.5979	20.123	15.7138	15.9154	5.76093	2.20874	6.93584	4.34203
ADAMTS10	0	0	0.0874594	0.184292	0.162255	0.471214	0.0463697	0.0410988	0	0	0	0.00973121
ADAMTS12	0	0	0.0123737	0	0.0344336	0.0117648	20.6126	22.2467	0.0103103	0	0	0.198254
ADAMTS13	0.0228438	0.133759	0.955722	0.466199	0.462027	0.413691	0.564087	0.598514	0.459715	0.445381	0.635851	2.74226
ADAMTS14	0.165007	0.13597	0.116169	0.183682	0.549416	0.044181	3.10695	4.17438	0.455292	0.69443	0.962031	1.93275
ADAMTS15	0.0477295	0.0290115	0.408245	4.14275	9.40744	16.7418	8.91984	9.87482	0.29541	3.50329	24.7322	7.88219
ADAMTS16	0.120458	0.188593	4.57235	11.6214	7.76242	6.72607	0.4966	0.138995	0.0718849	0.0497385	0.455872	0.181009
ADAMTS17	0.664982	0.716845	2.08207	3.81108	4.32548	6.94233	0.406962	0.153298	1.56699	1.5489	7.91067	1.08252
ADAMTS18	0	0	0	0	0	0	0	0	0	0	0	0.0618697
ADAMTS19	0	0	0	0.0253583	0	0	0	0	0	0	0	0
ADAMTS2	0.0910393	0.0323292	0.0755645	0.723503	4.33179	0.0974169	44.8268	51.7268	0.026605	0.0257719	0.0620984	0.776781
ADAMTS20	0.141712	0.162704	0.223283	0.156832	0.088765	0.14153	0.146568	0.169879	0.00885954	0	0	0
ADAMTS3	3.20775	3.35323	1.29755	0.782764	0.825055	0.467611	0.687942	0.845771	0	0	0.0713008	0.0978006
ADAMTS4	0.695962	0.435847	0.469957	1.20034	3.57993	7.33884	3.24668	1.84704	13.0174	6.60951	43.1952	6.89276
ADAMTS5	0.0662673	0.0895097	0.0807946	0.314305	0.328606	0.153637	5.50938	6.37843	0.00517861	0	0.0120994	0.00414907
ADAMTS6	0.00739456	0	0	0.00876806	0.0154392	0.0158251	0.564769	0.883821	0.672635	0.154496	0.0810079	0.744474
ADAMTS7	0.711489	0.64069	4.49302	15.3614	17.8263	18.5574	13.0074	14.33	0.556009	0.538599	3.23684	0.564263
ADAMTS8	0	0	0	0	0.18918	0.581727	0.0540644	0	0.0141614	0.0548719	1.4062	0.941721
ADAMTS9	5.56225	6.14847	3.5972	6.11622	7.32556	11.7308	3.23564	2.5181	0.0206715	0.0133494	0.032198	0.623829
ADAMTS9-AS2	0.0258078	0.0522893	0.029045	0.21421	0.269422	0.19331	0.0923955	0.0545951	0	0	0	0
ADAMTSL1	0	0	0.0692612	0.187249	0.325026	0.226826	0.222711	0.101511	0	0.0745394	0.704335	0.205503
ADAMTSL2	0.148702	0.178033	0.197783	0.288529	0.0987885	0.101258	0.0967955	0.128689	0.228188	0.221043	0.148095	0.86333
ADAMTSL3	0	0	0	0	0.00764601	0.0313485	0	0	0	0.00665319	0.072212	0
ADAMTSL4	0.679467	0.728261	1.61966	5.79463	5.27195	3.8587	9.39334	10.1963	0.367583	0.670682	0.25655	0.668424
ADAMTSL5	2.36269	2.21401	7.22376	9.71201	7.58462	6.76293	5.66266	5.74787	3.82199	2.80803	6.08259	5.65094
ADAP1	0.0493248	0.124922	0.305316	0.643353	2.16271	3.58905	0.882948	1.1217	3.23786	3.02446	10.0776	2.76092
ADAP2	0	0	0	0.0243369	0.0214268	0	0.0244936	0.0868375	0	0.0372891	0.0224848	0.0154208
ADAR	64.9502	66.0481	131.953	59.7088	62.4605	62.5763	90.5617	86.5965	46.5859	63.425	58.3508	27.3793
ADARB1	7.76814	8.57029	7.39498	7.50351	10.2057	13.7288	3.61519	1.62775	2.74261	3.84435	10.752	5.67342
ADARB2	0.0063531	0	0.00715001	0.0301326	0.0198971	0.0203945	0.0303267	0.0134397	0.00595773	0.00577117	0.0139197	0.0334131
ADARB2-AS1	0	0	0	0	0	0	0	0	0	0	0	0
ADAT1	15.7905	16.0288	12.5415	9.54738	10.4696	9.93251	11.8599	10.2061	9.62792	9.87884	8.07747	9.10374
ADAT2	1.7357	1.5834	0.544237	0.542683	0.58597	0.545176	0.597704	0.529762	1.68437	0.525572	0.416243	1.12891
ADAT3	2.68153	2.23277	1.40655	1.48092	1.34218	1.25781	2.45486	2.60321	5.13265	4.97193	3.05836	5.3818
ADC	0.422527	0.321032	3.06121	1.87879	1.59899	1.38464	2.26906	2.70944	1.43634	3.5024	9.77837	5.65473
ADCK1	3.06294	3.13184	3.67234	3.0192	2.83798	2.39557	2.46978	2.39512	3.78877	4.56074	3.70959	4.06172
ADCK2	11.7045	12.6902	7.56612	7.82819	15.198	12.1104	17.4022	12.7383	24.2653	20.2323	26.6779	25.6733
ADCK3	10.3894	9.90246	12.4491	10.2242	9.88377	9.4116	8.70874	8.18599	6.95145	8.35616	7.91035	4.67488
ADCK4	11.4733	10.8371	11.6652	9.95161	10.9754	10.5659	12.6429	15.515	9.62456	9.72512	8.27715	10.5532
ADCK5	6.22903	6.34039	15.0222	10.2701	7.24603	7.04627	4.10618	4.29829	3.92207	4.41899	4.45181	6.35154
ADCY1	30.0029	30.7474	9.33331	11.0173	8.96363	10.5833	2.44377	1.23578	12.6973	4.06389	4.25399	0.568182
ADCY10	0	0	0	0.0390188	0.0104526	0.0117365	0	0	0	0.0298922	0	0
ADCY10P1	0.145065	0.134307	0.191503	0.129158	0.0381531	0.103604	0.0576726	0.0896375	0.136678	0.143742	0.119074	0.992776
ADCY2	0.0740458	0.0583429	0.851857	0.487774	0.438037	0.255306	0.206184	0.113129	3.44102	7.69044	2.72195	0.98285
ADCY3	31.2213	33.7593	13.3333	14.9489	20.7305	19.178	19.7877	16.8532	29.8369	21.7618	13.5656	13.7777
ADCY4	0.0162563	0.0164685	0.0182956	0.038554	0.0169709	0	0.283674	0.37714	0	0	0	0
ADCY5	0.127328	0.129092	1.98489	1.83963	1.11939	0.863803	0.10138	0.0843696	0.490369	0.370342	0.744949	0.359515
ADCY6	7.8609	8.79722	13.2797	14.0763	13.2206	17.3634	19.7036	20.5281	8.08127	9.66982	11.9352	3.31201
ADCY7	2.68482	2.36316	1.26808	1.54479	2.26065	2.26064	3.85532	3.27741	1.0236	0.527761	0.5111	0.462963
ADCY8	0	0	0	0	0	0	0	0	0	0	0	0
ADCY9	10.2971	11.0575	12.9953	20.3687	17.114	18.7157	25.4881	24.1111	10.086	8.57806	10.3297	2.36843
ADCYAP1	0	0.017887	0	0.02094	0	0	0.021075	0	0	0	0	0
ADCYAP1R1	0	0	0.00943795	0	0.0262765	0.0628553	0.0300386	0.0177464	0	0	0	0
ADD1	43.0654	41.9571	66.6602	52.0898	60.2622	49.3627	72.4103	71.1061	49.9163	84.8876	79.706	43.9197
ADD2	0.131205	0.045444	0.0328126	0.293868	0.928356	1.45238	1.5022	0.915367	3.22293	2.29483	1.34175	5.118
ADD3	15.4561	14.8228	65.3594	51.0048	56.5906	74.9235	40.3753	37.7722	25.0683	83.2311	83.9076	15.1867
ADGB	0	0	0.0115587	0	0	0	0	0.0108632	0	0	0	0
ADH1A	0	0	0	0	0	0	0	0.0426314	0	0	0	0
ADH1B	0	0	0	0	0	0	0	0	0	0	0	0
ADH1C	0	0	0	0	0	0	0.0491221	0	0	0	0	0
ADH4	0	0.0297955	0	0	0	0	0	0	0.0275812	0	0.0322205	0.132587
ADH5	51.1646	51.9843	50.3546	36.7309	45.9492	33.5594	43.0733	43.1587	50.9517	49.2201	51.478	52.7728
ADH6	0	0	0	0.103573	0.0455941	0	0	0.0461954	0	0.0396738	0	0
ADH7	0	0	0	0	0	0	0	0	0	0	0	0
ADHFE1	0.12356	0	1.63394	1.17208	0.773947	0.59497	0.663542	0.882174	0.811092	2.1326	2.19961	1.8799
ADI1	47.7991	50.0048	62.0618	52.512	64.4221	58.3622	46.0744	44.8157	50.1155	184.901	173.537	56.9757
ADIG	0.0922864	0	0.103862	0	0.0963431	0.0987513	0	0	0	0	0	0
ADIPOQ	0.298545	0.229853	0.0403103	0.0707919	0.0623256	0.191672	0.171009	0.0757794	0.235169	0.108473	0.209314	0.637042
ADIPOQ-AS1	0.0483807	0.0163374	0.0181498	0.133857	0.0841791	0.0690266	0.115473	0.0341157	0.0907398	0.0292995	0.12367	0.157517
ADIPOR1	78.3877	78.0212	77.4287	76.2721	80.8645	71.7206	61.9832	52.6071	125.061	104.301	123.956	56.8734
ADIPOR2	63.3599	64.9467	55.2078	43.6576	44.4253	37.4065	48.6127	44.7909	41.261	42.8581	26.7177	24.4596
ADK	11.5716	9.81249	13.674	23.7628	25.9017	27.5649	17.5599	18.2323	8.77189	6.75053	15.0025	14.6399
ADM	60.2902	68.6853	8.35765	17.412	39.2009	4.84863	105.195	122.97	16.6034	4.61162	6.20496	42.9338
ADM2	1.07533	0.962389	0.721549	0.867953	0.982562	1.12738	3.41244	2.90579	4.78567	1.90849	2.62301	3.29062
ADM5	2.32703	2.191	0.554595	0.616776	0.657345	1.87486	2.15628	2.98259	1.59173	1.09424	0.779778	5.73878
ADNP	41.5124	42.257	45.9771	41.0826	39.8287	43.6235	43.3125	42.9931	32.771	37.3463	37.016	13.8391
ADNP2	10.046	10.0546	7.55254	7.07312	7.08991	6.53395	7.84015	7.44986	8.12627	7.70705	6.20368	3.42948
ADO	8.42884	8.6892	10.2711	7.51344	9.35706	7.00267	11.3339	12.5255	20.1921	12.8332	8.56732	4.99494
ADORA1	10.0801	9.82388	1.49264	4.234	5.28383	4.81094	4.35812	4.85599	0	0.0741412	0.403084	0.291275
ADORA2A	0.132688	0.156824	0.522663	0.288447	0.207782	0.236639	1.74182	1.076	0.725846	0.301336	0.411856	0.598159
ADORA2A-AS1	0.0889352	0.155881	0.170021	0.118228	0.0697773	0.201858	0.0797646	0.233715	0.14167	0.138729	0.182453	0.418446
ADORA2B	9.25996	9.34935	2.6928	5.12152	4.6713	4.35581	2.44746	2.9252	6.70218	3.52843	1.87228	7.33086
ADORA3	0.381274	0.88286	0	0.0303466	0	0	0.130001	0.084682	0.0240001	0	0.0280371	0
ADPGK	26.3507	27.9041	33.0682	36.9536	39.243	42.6415	25.9154	26.4074	31.2949	38.9389	43.193	25.4
ADPGK-AS1	1.1787	0.83796	1.32655	1.25052	1.16575	1.41617	0.814375	0.94053	0.736897	1.18345	1.35923	0.186441
ADPRH	5.1347	5.10358	7.37794	5.09285	6.45609	5.6499	6.74427	6.13134	11.0839	10.7369	8.95062	3.99132
ADPRHL1	0.0939479	0.0705085	0.313319	0.288847	0.130771	0.186189	0.358301	0.33128	2.9367	6.56742	4.05724	2.14615
ADPRHL2	13.1729	12.1705	10.5556	10.0382	12.5417	9.81059	14.6722	13.2273	8.20245	11.9982	14.0846	16.9968
ADPRM	1.78886	1.85248	4.29493	3.6295	2.82199	2.04179	2.56175	2.94331	1.82665	1.19167	1.35002	2.03098
ADRA1A	0.298486	0.403176	0.307933	0.412916	0.259672	0.42586	0.296839	0.394645	0.303236	0.271145	0.245245	1.71934
ADRA1B	0.152883	0.154878	0.286766	0.151067	0.345807	0.463513	1.42917	0.40427	0.334526	0.0694395	0.251226	0
ADRA1D	0	0	0.0238778	0	0.0221491	0.0227028	0.075958	0	0.0198961	0	0	0.047822
ADRA2A	1.37985	1.54197	5.13908	19.4314	24.3846	29.9564	9.20106	8.72692	0.0666998	0.1163	13.6982	0.224446
ADRA2B	0.153532	0.120973	0.019199	0.0202278	0	0	0	0	0.0479925	0	0.280326	0.0128171
ADRA2C	3.24607	3.19793	6.30101	6.1796	5.12977	4.42946	3.66056	2.99246	1.98283	1.00095	0.782992	1.27538
ADRB1	0.09826	0.199085	0.15482	0.139814	0.205159	0.168229	0.164166	0.187078	1.1426	0.267779	0.107644	0.0885912
ADRB2	1.27887	1.69863	13.6893	18.3318	11.3631	7.29847	6.17256	4.47894	0.159905	0.0516326	0.373604	4.03561
ADRB3	0.0213815	0	0	0	0	0	0	0	0	0	0	0
ADRBK1	53.6861	53.2762	39.3548	38.9021	38.3401	32.743	29.5135	28.1197	21.7708	19.1413	18.3858	21.3188
ADRBK2	4.06575	4.17263	5.49887	2.48394	1.94667	1.67961	1.31687	0.986171	6.09262	5.52661	5.37202	3.91485
ADRM1	233.162	225.429	115.246	115.795	152.835	112.806	124.679	123.768	95.9932	101.053	96.8918	224.269
ADSL	108.379	105.902	79.0157	56.6128	75.5757	46.1457	70.3976	73.6301	217.049	152.033	128.711	98.0355
ADSS	37.0184	36.2289	19.9074	20.4216	20.2641	25.5405	14.1453	16.1593	21.718	18.6636	19.267	6.33293
ADSSL1	3.73828	3.88094	85.0864	79.6392	44.1592	46.5205	4.70233	3.06351	32.4053	35.7082	57.0982	19.0546
ADTRP	0	0	0	0	0.0340725	0	0.116871	0.207179	0.0918358	0.0573764	0.0357555	0.466034
AEBP1	38.6408	41.1379	233.694	448.995	280.645	290.746	118.129	108.235	93.2055	92.6857	272.526	90.953
AEBP2	6.2341	6.19381	5.59483	5.28218	5.96868	6.7508	6.3148	6.34951	5.11578	4.42103	4.87881	3.96569
AEN	41.1136	39.8149	21.1771	17.3348	22.1533	17.2558	22.0275	19.4287	23.1296	14.3394	15.0134	12.8034
AES	83.9298	78.2992	243.146	169.863	187.684	153.532	163.003	162.691	148.2	171.917	183.524	196.74
AFAP1	5.86343	5.55648	8.58419	14.3284	10.3262	12.244	11.932	10.6749	12.2297	4.50329	6.76806	4.75993
AFAP1-AS1	0	0.00805353	0.00894787	0.0564095	0.0165712	0.0593629	0.0283976	0.0670618	0.304713	0.0143986	0.0347286	0.0357269
AFAP1L1	16.8601	16.7898	26.0397	18.9567	25.7082	24.9566	11.9728	8.61352	20.6128	26.1102	45.925	14.4413
AFAP1L2	2.03571	1.3608	1.71438	4.29376	13.4403	22.2513	14.4171	14.8379	16.012	25.6145	44.0032	14.8579
AFF1	10.2232	11.9667	7.85474	5.93998	5.88835	5.58914	9.47016	9.00424	8.19999	9.05249	4.42235	2.1111
AFF2	0.378054	0.32227	1.53604	1.69446	1.17389	1.47852	1.57872	1.61871	0	0.00352468	0.00473829	0
AFF3	0.771948	0.634977	1.11379	0.774483	0.969112	0.953076	3.59664	4.01743	0.649631	0.797099	1.6743	1.07571
AFF4	19.4935	19.7084	19.6878	21.2646	17.5238	22.0096	22.4121	22.0154	18.9021	17.3182	14.5379	4.06022
AFG3L1P	4.88327	4.79121	2.52671	3.67258	2.68093	5.31851	2.46984	2.99758	2.67958	2.43121	2.20789	7.86504
AFG3L2	49.4886	47.5283	38.1481	23.4558	27.1476	20.8697	19.7485	17.1175	79.6301	69.9677	47.1121	44.6398
AFM	0	0	0	0	0	0	0	0	0	0	0	0
AFMID	9.73672	10.6816	11.5226	9.36291	12.3623	9.04155	10.2049	11.7059	38.189	28.4381	32.1301	44.4546
AFP	0	0	0	0	0	0	0.0341007	0	0	0	0	0.257631
AFTPH	7.85025	8.71251	9.33602	9.04063	8.70119	9.5677	7.89865	7.37573	12.406	12.6137	9.03625	8.30009
AGA	8.93962	7.74664	6.85696	7.14959	8.30882	7.63998	10.7864	10.794	12.8974	10.3755	9.11687	4.03768
AGAP1	8.71542	9.75712	21.8927	22.2888	16.1441	17.7092	7.25773	5.14533	6.80404	9.01793	14.6101	4.25052
AGAP1-IT1	0	0	0.255591	0.40393	0.118543	0.243013	0.271021	0.120107	0.638911	0.722089	0.995174	0.511891
AGAP10	0	0	0	0	0	0	0	0	0	0	0	0
AGAP11	0.184206	0.0907767	0.261742	0.46175	0.147831	0.359875	0.303995	0.360808	0.0550458	0.0321589	0.0969567	0.31717
AGAP2	0.235596	0.220091	0.717095	1.12711	1.21833	1.36902	1.09853	1.11799	0.599569	0.47519	0.196797	0.34249
AGAP3	75.1208	75.0722	42.1116	34.5437	43.5201	34.9784	56.4452	52.3678	71.5368	42.7728	46.2989	58.145
AGAP4	0.187643	0.190092	0.263975	0.222496	0.171404	0.401575	0.111964	0.248093	0.131974	0.0213069	0.0770863	0.370078
AGAP5	0.164557	0.19052	0.238112	0.585367	0.196332	0.704337	0.280541	0.522168	0.0220451	0.149484	0.103013	0.423898
AGAP6	1.05772	1.27759	0.526521	1.37478	0.424697	1.5236	0.728227	1.20484	0.324273	0.258686	0.245118	1.87977
AGAP7	0.0235717	0	0	0.0279501	0	0	0.0562601	0.0498649	0.0221048	0.0214126	0	0.0708409
AGAP8	0.0471435	0.119397	0.053057	0.0279501	0.0246079	0.100892	0.0562601	0.0498649	0.0221048	0.0214126	0.025823	0.123972
AGAP9	0	0	0	0	0	0	0	0	0	0	0	0
AGBL1	0	0	0.0178739	0	0.0165799	0	0	0	0	0	0	0
AGBL2	0	0.0780716	0.156118	0.0548281	0.112635	0.247393	0.220725	0.22824	0.130085	0.0980092	0.151967	0.382153
AGBL3	0.0784763	0.0953938	0.0882957	0.0372284	0.0491834	0.0503703	0.131077	0.0830245	0.117736	0.0712934	0.154727	0.11791
AGBL4	0	0	0	0.0222476	0	0	0	0	0	0	0.0205545	0
AGBL5	15.9854	15.9515	34.4178	23.4713	24.2472	18.7316	26.5461	24.7037	32.6848	40.1938	28.4414	32.147
AGER	1.70876	3.05141	2.22041	3.79857	1.93663	4.75347	3.53742	6.01142	1.32908	0.913781	1.40235	7.80912
AGFG1	9.27638	9.27208	6.91345	7.17176	7.69362	8.64105	8.8563	8.48918	9.61995	8.0962	9.79543	4.84279
AGFG2	5.13621	4.29584	3.68777	3.73749	4.36771	3.50629	4.2622	3.42992	9.55871	6.68448	4.45917	6.59353
AGGF1	7.32869	7.21539	9.23118	8.67557	8.9302	10.6595	10.9179	10.6651	9.2052	9.35784	9.55726	7.76715
AGK	13.3803	13.4966	14.497	14.6364	16.7942	15.7145	17.5485	16.6299	28.9837	35.3829	24.2481	18.6782
AGL	3.04283	3.08148	3.80599	3.34451	2.94456	3.38405	4.38037	4.76062	3.80635	3.01242	2.99489	0.850412
AGMAT	0.743686	0.735455	0.199279	0.587881	0.351218	0.6821	0.253571	0.187289	0.199258	0.209104	0.155183	0.838133
AGMO	3.93315	3.02914	0.25886	0.190912	0.312155	0.393794	0.356834	0.145972	1.29417	0.919338	0.52915	0.950472
AGPAT1	144.487	133.735	172.323	177.681	185.419	184.042	111.964	93.9861	57.8521	105.838	132.752	67.0838
AGPAT2	41.8692	39.4756	65.9882	53.4021	58.0521	44.9661	47.3949	43.7079	45.9853	51.204	58.8405	47.361
AGPAT3	14.7553	14.8561	17.8398	16.2866	18.8368	17.0385	23.7136	21.6463	9.34485	15.0698	14.934	8.70033
AGPAT4	0.1157	0.172368	1.08	1.37191	1.05865	1.34729	1.6975	2.15243	0.727587	0.723351	1.07365	0.4551
AGPAT4-IT1	0.0627446	0.0953454	0	0.371995	0.0327513	0.36927	0.149756	0.29865	0	0.0569973	0.137474	0.589276
AGPAT5	11.7868	11.4232	3.8801	5.47399	5.4962	5.57052	3.05938	2.70123	16.3588	8.64603	6.56386	6.13265
AGPAT6	32.4053	31.8317	33.5914	27.5605	25.4259	22.8484	18.754	15.9164	36.4696	49.541	41.6668	46.7597
AGPAT9	22.185	22.4294	1.71374	2.51027	6.93867	3.80668	11.4216	12.6879	25.0576	15.3976	10.3042	7.70796
AGPHD1	2.10815	1.31468	6.90864	4.56452	4.02381	5.06115	3.11838	4.07889	3.05643	4.40612	3.64586	3.60765
AGPS	9.84354	9.12803	5.19245	5.82766	5.39393	5.79096	7.66151	7.6274	14.4964	11.0152	9.19603	5.9545
AGR2	0	0	0.0754641	0.079508	0.140001	0.0717504	0	0	0	0	0	0
AGR3	0	0	0	0	0	0	0	0	0	0	0	0
AGRN	17.1184	16.1827	85.7543	73.3215	78.4357	84.1241	120.962	118.771	38.6607	42.527	85.4182	19.5569
AGRP	0	0	0	0.110601	0.0973753	0	0	0.0986596	0.0874704	0.0847314	0	0.140161
AGSK1	0.531879	0.314313	0.523772	0.183946	0.370173	0.308284	0.370262	0.562583	0.665039	0.724741	0.388452	0.482872
AGT	0.0877899	0.0667019	0.716314	0.44241	0.756104	0.117425	0.890517	0.812505	0.0411633	0	0.168305	0
AGTPBP1	3.16013	3.49013	3.12417	2.65971	2.89798	3.26216	2.30711	2.39877	4.13723	3.18588	2.29439	2.75606
AGTR1	0.101035	0.196708	0.312697	0.316597	0.414786	0.16216	1.11528	1.45695	0	0	0.0282328	0.091176
AGTR2	0	0	0	0	0	0	0	0	0	0	0	0
AGTRAP	24.5824	22.7516	32.0991	27.9801	32.9345	26.793	38.1155	37.8125	31.2442	45.4314	38.6062	46.6746
AGXT	0	0	0	0	0	0	0	0	0	0.0340389	0.0820998	0.225227
AGXT2	0	0	0	0	0	0	0	0	0	0	0	0.0178228
AGXT2L1	0.0823168	0.222427	0.0325987	0	0.0604989	0	0.356925	0.203205	0.797928	0.157969	0.0952435	0.0217537
AGXT2L2	2.71425	3.15921	7.37682	7.01887	6.57146	8.466	8.27013	9.1931	5.3073	8.39364	8.92044	11.4765
AHCTF1	17.6493	17.8546	5.28661	7.50982	7.96394	9.97333	7.72827	7.51837	14.7261	7.70108	7.35242	3.65967
AHCY	209.54	200.756	123.532	84.3251	128.283	75.1487	97.2854	92.4883	148.029	117.382	103.163	79.8436
AHCYL1	34.7352	34.7179	30.7848	31.598	35.6207	32.1609	42.3318	39.7883	43.8456	38.2045	37.4299	28.8841
AHCYL2	9.79461	9.80286	21.0251	16.2295	15.9144	16.9786	8.30075	6.11829	12.1779	22.1866	27.3695	4.74449
AHDC1	9.11542	9.31851	9.55809	11.035	11.0588	9.50525	24.57	26.9052	5.52749	3.89891	6.22079	3.94207
AHI1	2.13801	1.88283	1.34353	2.31851	1.79131	3.16623	2.9421	3.64114	3.70998	2.76621	2.90445	5.42769
AHNAK	126.084	145.655	237.077	595.433	330.817	498.349	208.432	210.237	7.73389	42.5029	251.097	48.9263
AHNAK2	0.5537	0.552163	0.597189	1.10108	0.912218	1.10783	2.30583	1.87595	1.83087	1.62683	1.69969	2.95326
AHR	44.1012	44.8258	26.1007	51.2781	47.0415	44.8043	85.1852	101.669	14.3395	15.3981	56.2202	9.63778
AHRR	13.9601	15.2392	35.3178	44.4782	27.0522	28.5918	22.4515	26.0553	0.553035	4.93562	12.7941	4.84478
AHSA1	101.15	97.9575	48.1698	50.1297	61.0508	51.6411	58.1141	51.462	73.0664	66.9698	85.4046	91.5842
AHSA2	3.36285	4.47369	3.2648	5.89359	1.87107	7.77023	3.96906	5.7068	3.65606	2.31629	2.65169	15.0487
AHSG	0	0	0	0	0	0	0	0	0.0357809	0	0.0417995	0
AHSP	0	0.175215	0	0	0	0	0.206404	0	0	0	0	0.129948
AICDA	0.685711	0.919405	1.33917	1.3631	0.821125	0.927974	0.24068	0.234654	0.226954	0.0549619	0.198847	0.712184
AIDA	29.9578	26.9872	21.2112	18.369	24.288	23.4389	36.1737	37.1688	22.4118	15.4781	13.4584	10.1546
AIF1	0	0	0	0	0	0	0	0	0	0	0	0
AIF1L	15.339	15.0197	19.0102	12.4526	15.8719	13.9001	3.50916	0.978495	20.0301	52.9057	36.2909	8.84965
AIFM1	35.6602	33.7347	34.6537	22.2822	23.805	17.4833	18.6073	17.4604	61.7398	57.9186	45.3306	34.3456
AIFM2	15.9419	15.4748	13.2882	15.4862	17.5938	15.6846	13.3521	12.848	22.5144	29.3041	25.3482	25.0922
AIFM3	0.523093	0.761063	1.5657	0.868354	0.260032	1.01311	1.09979	1.21344	0	0.0443188	0	0.11228
AIG1	0.973043	1.03055	9.00967	12.3769	16.5763	10.4121	36.7365	45.4725	1.53464	3.0937	9.64223	14.0899
AIM1	14.6634	14.934	1.51988	2.19129	5.66164	4.57104	16.4981	17.3969	0.533237	0.742525	0.295892	0.213613
AIM1L	0.0103621	0	0.0233237	0	0	0.011088	0.0247317	0.0328807	0.0097172	0	0	0.0311414
AIM2	4.08084	4.4235	1.19411	1.11293	2.21532	1.87769	3.2142	3.49629	0.0382688	0	0	0
AIMP1	19.3214	20.6086	10.9957	13.2025	13.0757	12.6392	12.8611	12.4265	16.4361	13.2798	12.6901	25.2566
AIMP2	67.0609	66.3434	33.0354	26.3215	35.6196	24.2849	26.4697	26.3263	33.8677	32.2269	21.2544	41.1789
AIP	113.86	106.039	143.111	98.0518	115.209	72.6782	72.0284	70.7672	40.9865	37.1669	40.9851	51.8698
AIPL1	0.303868	0.574679	0.205169	0.5285	0.211463	0.585335	0.24174	0.428571	0.303954	0.16559	0.377289	1.30915
AIRE	0	0.0252586	0	0.0591287	0	0.0266798	0.0297547	0	0	0.0226493	0.0273144	0.0749324
AIRN	0	0	0	0	0	0	0	0	0.0381198	0.011379	0	0.037646
AJAP1	0	0	0	0	0.0584465	0.0616707	0.602197	0.930542	0	0	0.0210459	0.0433018
AJUBA	2.05987	1.95551	7.55254	9.50881	6.73526	5.60052	13.6504	15.6899	3.77831	5.46057	7.01106	5.34125
AK1	19.1005	17.5534	40.4553	42.0225	33.1629	26.7002	22.7336	20.3102	10.3337	25.6582	58.9166	36.6383
AK2	101.719	101.288	56.9565	44.6319	57.4438	40.4656	43.3123	41.0462	75.4411	59.3582	54.6761	70.4065
AK3	7.27973	7.90052	11.0831	15.5621	13.1416	13.9325	7.3955	7.15763	4.98162	5.99852	8.38482	4.61187
AK4	7.89037	7.22465	1.71675	2.58796	2.91826	2.36693	2.53199	1.24121	5.72388	1.82626	2.10829	2.4566
AK5	0.502099	0.423878	0.339049	1.56779	2.80173	0.734273	8.55412	8.11349	0	0.0760179	0.403372	2.37664
AK7	0	0.017092	0.0189881	0.0200056	0.0176134	0.0361074	0.0805378	0.0892287	0.221505	0.183916	0.0924158	0.038029
AK8	0.0274632	0.0278216	0.030908	0.0651286	0.0860111	0.146935	0.131096	0.145243	0.0515081	0.0748428	0.451291	0.268242
AKAP1	27.8693	28.9261	12.7682	11.1807	13.5568	9.74974	12.0928	10.4294	32.8597	19.5945	9.53516	14.504
AKAP10	5.11588	5.90483	5.88345	5.93354	5.55965	6.74561	7.1394	7.27407	11.0762	9.71357	9.73893	5.21949
AKAP11	9.77394	9.7817	6.92791	7.22903	6.97076	7.94465	9.37356	8.72317	6.48858	9.04472	9.89464	1.91464
AKAP12	14.4017	15.2416	29.8293	31.162	28.2626	26.0934	12.7307	8.40884	13.6736	19.3476	7.90904	4.76969
AKAP13	6.11548	6.36687	7.63725	9.27708	8.81649	12.9237	13.0798	13.0262	7.17298	6.75607	11.1626	6.63762
AKAP14	0	0	0	0	0	0	0	0	0	0	0	0
AKAP17A	0	0	0	0	0	0	0	0	0	0	0	0
AKAP2	10.9381	11.1754	18.8306	20.968	15.6378	18.5119	25.0742	23.713	12.0274	14.591	24.5483	16.1224
AKAP3	0.0185494	0.037583	0.459275	0.395907	0.290471	0.15879	0.199228	0.313923	0	0.0168503	0.0406419	0.0418103
AKAP4	0	0	0	0	0	0	0	0	0	0	0	0
AKAP5	0.266039	0.218979	0.159062	0.285881	0.21698	0.400326	0.644894	0.641937	0.249483	0.151044	0.191263	0.787044
AKAP6	0.230834	0.150702	0.444528	0.413607	0.674747	0.422653	0.575432	0.526299	27.1356	13.122	11.6606	2.54369
AKAP7	0.803616	0.988557	0.775216	0.726007	0.798991	0.90086	1.44145	1.55346	1.63281	3.58051	3.64723	2.48701
AKAP8	15.6752	16.2919	11.937	13.1332	10.4359	10.7972	9.83864	10.1599	9.49173	10.2035	8.79181	10.9075
AKAP8L	23.492	22.8844	38.0115	31.7145	25.3241	24.728	34.4317	34.1047	23.8253	20.2968	20.1631	45.369
AKAP9	3.62528	4.08318	5.22809	5.95372	4.68403	7.35222	8.55173	9.15179	7.50444	9.28277	10.6003	10.9856
AKD1	0.288469	0.404632	0.912195	1.05016	1.3153	1.47804	1.22443	0.821479	0.526554	0.782723	1.76719	0.806536
AKIP1	34.7107	30.3056	31.8178	23.7617	26.7337	18.1742	32.6332	35.4505	21.3645	18.9188	14.3032	33.193
AKIRIN1	26.366	25.766	32.2864	25.3447	25.1434	23.7584	23.1104	22.6951	39.7196	37.2905	33.3541	17.9735
AKIRIN2	15.6886	16.4752	23.6441	16.8822	18.5872	15.4614	19.0111	16.1786	17.2352	15.8717	17.9817	22.4391
AKNA	2.23252	2.3206	2.91359	2.50924	2.24715	2.13213	5.37188	6.28424	3.31428	1.30798	0.589527	1.60634
AKNAD1	0.115732	0.0977014	0.0651228	0.182973	0.0201338	0.0619179	0.0920739	0.0816074	0.0180855	0.0525636	0.0422594	0.202896
AKR1A1	22.0176	20.4491	20.5222	22.5037	29.6381	25.1435	36.6099	34.6392	34.6217	25.0944	30.4313	30.426
AKR1B1	116.806	108.625	116.146	131.136	187.067	119.559	285.262	285.32	143.588	160.353	125.949	130.227
AKR1B10	0.487825	0.342133	0.42232	0.756416	0.822665	0.441691	2.05995	2.14332	0.0703794	0.170439	0.246653	2.81938
AKR1B15	0	0	0	0	0.038375	0	0.350941	0.272168	0	0.100176	0.12081	0.0828552
AKR1C1	0.17782	0.270212	0.450282	0.948823	0.324864	0.523262	0.424414	0.329149	0	0	0.58441	0.734812
AKR1C2	0.174755	0.0480721	0.0656579	0.138352	0.182713	0	0.0188732	0.0334598	0	0	0.0693151	0.0877316
AKR1C3	0	0.106129	0.0589411	0.303613	1.09387	0.112102	2.68847	2.81667	0	0	0.344351	1.73219
AKR1C4	0	0	0	0	0	0	0	0	0	0	0	0
AKR1CL1	0	0	0	0	0	0	0	0	0	0	0	0.0204086
AKR1D1	0.109587	0.111017	0.0986649	0.337875	0.0686373	0.351818	0.15694	0.0927281	0.0410987	0.199108	0.120054	0.69169
AKR1E2	4.55201	5.59508	5.02649	4.63111	5.42172	4.60878	3.75264	3.72311	0.0855578	0.248509	0.0499731	0
AKR7A2	33.85	32.5827	32.1321	22.6719	30.709	24.0935	28.4449	28.4373	12.3323	18.3711	20.4489	16.4784
AKR7A2P1	0	0.236234	0.262441	0.165903	0.0973764	0.199621	0.166971	0.147991	0.0437357	0.0423662	0.0510923	0.0350407
AKR7A3	0	0	0.113379	0.0597271	0.0525851	0.161699	0.36067	0.266393	0.188945	0	0.0551817	0.794752
AKR7L	0.0247559	0.0276592	0	0.0647517	0	0.0529803	0	0	0.102421	0.0224883	0.0299106	0.328546
AKT1	94.9269	88.8779	112.927	109.788	112.056	92.4136	89.4953	77.7715	144.183	149.015	154.006	147.713
AKT1S1	92.312	86.2339	59.0985	56.9968	66.8866	47.1537	68.5536	65.1022	45.1197	58.1236	50.7224	86.9427
AKT2	30.3507	30.1868	27.0388	21.1309	25.7588	20.3511	25.8287	24.5551	16.3226	21.3221	18.7132	15.3964
AKT3	20.0172	18.683	19.9061	17.8297	20.8377	26.9197	22.4311	23.7329	14.7501	10.804	15.7203	3.41173
AKTIP	2.28478	2.97965	3.48761	4.11045	5.42842	5.73252	5.48456	6.4999	3.9404	4.10323	5.48211	4.63681
ALAD	11.1344	11.4929	22.1217	17.2152	16.676	12.9088	15.0034	15.4122	10.0304	33.5132	38.9176	13.991
ALAS1	44.5896	44.6368	34.6935	27.7563	29.9325	21.2791	28.6303	24.9936	48.9744	38.3844	24.7836	23.5418
ALAS2	0	0	0	0	0	0.0326432	0	0	0	0.0554279	0	0.0229194
ALB	0	0	0	0	0	0	0	0	0	0	0	0.0192099
ALCAM	8.50016	8.04099	71.8781	132.231	112.196	158.085	46.0712	35.7544	37.8481	80.3851	238.759	18.9318
ALDH16A1	21.1131	20.3421	12.8838	10.9923	11.7436	9.48231	10.01	9.79045	7.24132	12.2632	8.69662	12.2939
ALDH18A1	42.3455	43.2638	44.8008	44.0264	46.5333	48.5683	37.2957	34.1335	25.6647	32.6111	51.8834	15.1876
ALDH1A1	22.8724	23.7087	43.4726	10.6996	19.7219	13.0635	6.7087	1.45463	11.2223	6.66278	7.69151	2.95477
ALDH1A2	0	0	0.0195745	0	0	0	0	0	0	0	0.228665	0.0392051
ALDH1A3	184.774	179.487	38.6796	65.0607	128.543	83.1793	186.744	189.869	109.084	19.92	36.382	53.5996
ALDH1B1	12.8492	12.2783	4.30751	4.06289	7.53466	4.6221	10.9186	9.02204	51.5651	64.52	37.9562	18.1304
ALDH1L1	0	0	0	0	0.0195914	0.0200808	0.022397	0.03971	0.50909	1.19088	1.78404	1.41128
ALDH1L1-AS1	0	0	0	0	0	0	0	0	0	0	0	0
ALDH1L1-AS2	0	0	0	0	0	0	0	0	0	0	0	0
ALDH1L2	4.17665	3.65767	5.04575	6.50198	5.98469	5.2293	11.8044	11.8184	0.0470442	0.0455708	0.117023	0.280049
ALDH2	0.0281438	0	0.102831	0.0722264	0.088143	0.0325877	0	0.0322123	16.047	20.7595	18.0674	5.31022
ALDH3A1	0	0.033655	0.0373888	0.157659	0.311606	0.0355489	0.118955	0.140607	0.280683	0.362564	0.400818	0.999787
ALDH3A2	8.87392	9.06383	13.1769	19.0074	20.6073	21.8717	21.6524	21.8649	21.295	22.3682	30.6171	14.9284
ALDH3B1	5.53454	4.67573	22.392	23.6741	24.6274	18.5909	29.3708	30.533	3.20841	8.0475	9.49505	15.1478
ALDH3B2	0.0640659	0.0693201	0.0256681	0.0811376	0.0714351	0	0.0272179	0	0.0427779	0.0207176	0.023395	0.06418
ALDH4A1	8.86721	8.54859	14.0485	10.2118	11.9255	10.0863	12.4924	11.4719	10.1003	12.4035	9.29222	7.91541
ALDH5A1	4.13735	4.4135	4.87501	3.10505	2.71877	2.43907	1.60679	1.23351	8.9981	7.13236	4.99417	4.37305
ALDH6A1	0.923812	0.695218	8.58488	7.35486	6.50295	7.54105	5.44929	4.8857	6.33651	12.5879	13.4457	2.53839
ALDH7A1	19.5054	18.8766	14.4732	11.7671	15.4882	12.6388	23.633	25.1032	18.0534	21.6295	14.2576	19.5898
ALDH8A1	0.071441	0.0723744	0.0267656	0.112979	0.049702	0.0254478	0.0568253	0.0503584	0	0	0.208843	0.445785
ALDH9A1	35.1039	33.0039	22.5573	13.5421	21.1379	17.0653	21.3127	20.5264	59.8436	51.8524	49.6471	22.4262
ALDOA	1527.84	1498.44	1022.9	757.338	1030.72	643.446	1116.27	978.917	1423.49	1544.14	1000.13	1757.17
ALDOB	0	0	0	0	0	0.0251549	0	0	0	0.0427096	0.360546	0.0353248
ALDOC	19.0601	17.8461	27.0981	24.6122	23.252	15.1806	17.5764	16.953	24.4074	11.6084	15.0672	34.2553
ALG1	10.5731	10.6259	8.0537	7.83767	8.21623	6.68334	6.93554	6.79891	6.73699	8.73954	8.80604	9.90092
ALG10	0.875348	1.21253	0.743888	0.550743	0.895177	0.917553	0.91671	1.03925	1.05541	0.908764	0.743675	0.214752
ALG10B	0.867941	0.798849	0.804083	0.978954	0.867419	1.44408	0.738943	0.621359	1.06207	0.956704	1.08418	0.457274
ALG11	5.49755	5.33954	6.84878	6.52741	5.41	7.9032	5.06349	5.86981	3.76504	3.73596	3.33098	3.02402
ALG12	28.0543	29.298	31.4109	31.7532	30.2923	25.5913	29.4597	28.9612	30.4375	33.7682	49.1054	30.8941
ALG13	4.87581	4.47803	4.96424	4.6758	4.52153	4.54987	4.01005	3.86805	6.44093	6.38845	6.99185	3.52729
ALG14	9.43038	8.31276	10.2687	7.5515	9.39742	8.97706	6.94242	6.67143	9.99201	12.1267	14.6915	11.0421
ALG1L	0.775755	0.611241	2.03715	1.43087	1.25977	1.19553	1.02863	2.73512	2.18241	1.16882	1.51639	1.29164
ALG1L2	0.477962	0.138343	0.537916	0.404815	0.213845	0.365317	0.0814843	0.433331	0.960465	0.372156	0.374007	0.41041
ALG2	5.72146	7.35878	7.47131	7.61826	8.19633	7.55126	8.30539	8.18923	8.9568	9.71487	11.7699	7.86684
ALG3	72.5074	71.0378	38.4658	40.8429	46.4897	34.9362	40.8031	37.9686	63.9215	51.0498	57.5825	49.2766
ALG5	43.1008	40.6232	25.0091	23.8076	26.3235	25.5087	20.5746	22.5579	32.6216	22.7842	19.1653	25.85
ALG6	4.89858	4.76202	4.21367	4.53726	4.09802	6.23009	1.92894	1.51777	4.5628	6.57744	5.45677	2.34212
ALG8	23.6128	23.3467	16.4147	13.6561	14.126	12.6502	8.0938	8.86763	27.7192	21.841	20.2741	29.7212
ALG9	2.3642	2.46202	1.34203	1.50771	1.68569	1.46643	1.47589	1.73204	3.49969	3.8545	3.53161	3.73098
ALK	1.99943	1.89457	0.193986	0.327009	0.917702	0.691648	0.627375	0.528713	0.897092	0.093946	0.557039	0.18778
ALKBH1	3.77338	3.60039	3.30848	3.01753	3.00024	2.91091	3.56057	3.24865	5.43127	4.66333	4.27796	3.54383
ALKBH2	34.1249	32.0024	18.0977	14.7235	18.4482	10.4624	14.111	14.9316	18.9467	13.8123	16.9388	39.9414
ALKBH3	27.0932	26.3614	19.3803	17.2879	20.0146	14.2499	12.7412	13.2762	14.139	14.6001	15.0081	15.5258
ALKBH4	8.28347	7.09421	9.01586	9.56361	8.78982	8.10567	10.178	10.4621	11.6264	14.5297	13.791	18.8961
ALKBH5	27.3628	25.0004	27.5554	27.4979	28.2617	25.611	31.6699	28.7371	38.3685	46.6131	48.5783	49.2822
ALKBH6	18.6503	14.5784	14.4956	11.6983	12.9305	10.7015	15.4886	17.2187	14.2745	15.4091	9.60259	35.0898
ALKBH7	15.295	16.2459	47.7806	18.9603	23.322	13.0932	18.5846	19.2174	31.0333	32.7983	18.5837	32.4551
ALKBH8	2.01476	2.17805	0.928301	1.60335	1.34105	1.56267	1.43617	1.38734	4.29865	3.2428	4.02923	2.88528
ALLC	0	0	0	0	0	0	0	0	0.0394714	0.0764708	0	0.189745
ALMS1	4.3988	4.88062	2.12629	2.28407	2.43114	3.17752	3.24965	3.1496	3.51265	2.9139	2.62318	1.56145
ALMS1P	0	0	0	0.177853	0.0391464	0	0.0447494	0.0396627	0.175822	0.20438	0.164317	0.197215
ALOX12	0.436504	0.737003	1.00981	0.661355	0.379743	0.467082	0.347277	0.410401	0.63675	1.16753	0.557892	1.47582
ALOX12B	0	0	0	0	0.0237298	0	0.0271263	0.0721284	0	0	0	0.0512348
ALOX12P2	0.0203725	0.0206384	0.0229279	0.0241566	0.021268	0	0.0243121	0	0	0	0	0.0459195
ALOX15	0.0210625	0.0640123	0.047409	0	0	0	0	0.0668351	0.0197517	0.0382665	0.0230741	0.110775
ALOX15B	0	0	0	0	0	0.0244045	0	0	0.0427774	0.0207172	0.0499735	0.0171345
ALOX15P1	0	0	0	0.132342	0	0	0	0	0	0	0.12227	0
ALOX5	0.191155	0.338893	0.546006	2.98926	2.20971	1.99863	0.358409	0.398503	0	0	0.0261708	0
ALOX5AP	0	0	0.0837398	0	0.310713	0.23886	2.04233	1.88888	0	0	0.0815128	0.838576
ALOXE3	0	0	0.0194051	0	0	0	0.0411565	0.0547184	0	0.0156624	0	0.0259105
ALPI	0	0	0	0	0	0	0	0	0	0	0	0
ALPK1	1.18632	1.06615	2.34387	2.01815	1.84137	1.70991	2.72658	2.8428	4.10343	4.29581	3.67824	2.04414
ALPK2	0.0147162	0.0149083	0.0745297	0.889933	1.7898	0.125977	9.63277	12.0167	0	0.0133682	0.0241826	1.50925
ALPK3	0.0877657	0.0740928	0.208524	0.138757	0.0661726	0.120001	0.389857	0.448688	0.032007	0.053151	0.133539	0.0476242
ALPL	0.0436748	0.0663675	0.584804	2.72943	4.06422	1.75254	10.6265	10.0711	0.409581	0.753814	4.98438	1.44997
ALPP	0.0392302	0.0596134	0.0883022	0.0930341	0.061432	0.0839568	0.117041	0.186727	0.0183944	0.0534552	0.0644654	0.353699
ALPPL2	0	0	0	0	0	0	0	0	0	0	0	0.0171379
ALS2	3.95502	3.84381	4.37723	6.74151	5.64253	6.81343	6.65758	6.15057	10.4076	11.0318	10.7135	4.78853
ALS2CL	0.0440696	0.0339209	0.376914	0.436856	0.195834	0.286526	0.776878	0.735249	0	0.0152082	0	0.0628941
ALS2CR11	1.14774	1.22543	0.713649	0.388746	0.4412	0.146191	0.326169	0.351731	0	0	0	0
ALS2CR12	0.0866251	0.0608167	0.304064	0.177973	0.0626719	0.096362	0.0358181	0	0.422276	0.299966	0.0657672	1.63631
ALS2CR8	0.298742	0.276897	1.05337	1.13475	0.772147	1.20834	1.33351	2.09847	0.324776	0.543512	0.794767	0.869148
ALX1	11.2616	11.0202	20.6563	6.9324	9.45534	5.38427	6.97703	7.34977	9.84173	13.2338	10.4472	11.4136
ALX3	0.820012	1.28761	1.52274	1.65295	1.15568	1.09682	2.05503	1.64796	1.23037	1.1546	1.84157	1.04737
ALX4	1.01254	1.10621	1.9998	1.83623	2.38354	1.18969	1.64667	1.74298	0.0186182	0.0360703	0.0326248	0.0522087
ALYREF	116.226	107.67	35.351	39.6035	67.9648	56.3944	67.222	57.1059	147.445	140.384	99.9004	342.135
AMACR	4.7109	5.30167	4.3504	3.17703	3.78008	2.94576	5.94886	6.02493	3.13568	2.68452	2.92473	1.7158
AMBN	0	0.0294145	0.980329	0.172144	0.151559	0.124278	0	0	0.0816857	1.89907	8.42928	0.130892
AMBP	0.0424673	0	0	0.100711	0	0.0454422	0.456116	0.404269	0	0	0	0.0638141
AMBRA1	18.0202	17.5502	25.8241	17.9297	16.1761	13.6879	11.9272	10.5994	8.04709	13.0618	16.3559	6.60954
AMD1	34.4035	33.3753	7.80297	7.16218	11.8996	7.76647	18.0207	18.1663	26.5264	12.9323	10.0858	9.11879
AMDHD1	0	0	0	0.0320586	0	0.0578614	0	0.0571949	0.152125	0.442084	0.53314	0.446899
AMDHD2	15.7347	16.2083	25.1153	11.1339	12.0039	8.43891	6.49991	5.56102	20.2985	26.2595	17.3734	23.8263
AMELX	0	0	0	0	0	0	0	0	0	0	0	0
AMELY	0	0	0	0	0	0	0	0	0	0	0	0
AMFR	28.9631	30.5566	53.369	36.0572	42.7771	31.5023	41.9063	40.7057	35.9305	38.9133	35.5206	23.0321
AMH	0.118365	0.350056	0.0972223	0.0354381	0.120245	0.647065	0.446731	0.446965	0.189024	0.313894	0.473184	11.0122
AMHR2	0	0	0	0	0	0	0	0	0.952291	0.143057	0.333179	0.20009
AMICA1	0.0893904	0.0301844	0	0	0	0	0	0	0	0	0	0
AMIGO1	1.31336	1.61061	1.91895	2.62284	2.35732	2.61349	1.9523	2.19344	0.540188	1.06748	2.82711	0.0692472
AMIGO2	0.0366042	0.037082	0.061794	0.0868074	0.229138	0.137091	11.1004	13.8523	6.49936	2.29551	1.04509	2.05279
AMIGO3	1.9626	2.16027	2.03887	2.93129	2.56108	3.83668	3.60325	3.69267	0.902534	1.11427	2.10869	1.6447
AMMECR1	6.2276	5.7623	3.09615	4.99537	5.36276	7.28685	3.82153	4.18645	5.2621	8.1739	8.24096	5.32398
AMMECR1L	19.8431	20.7195	22.7142	24.0948	19.7812	19.6634	14.2712	11.836	12.5671	11.0528	15.1572	6.2299
AMN	0.23164	0.0782211	0.173797	0.137333	0.120911	0.0826223	0.322507	0.0816705	0.036204	0.0701407	0.0845876	0.377084
AMN1	1.12363	1.08696	2.09734	1.39733	1.83858	2.22874	2.14836	2.26104	5.88532	0.970916	1.62128	1.00894
AMOT	1.74929	1.65835	2.14577	1.37567	1.7677	1.74402	2.35627	2.21429	27.4741	25.5101	15.4797	1.55104
AMOTL1	33.0991	32.8453	33.1068	26.1694	21.9861	23.1395	9.92989	8.06614	31.4013	21.4944	20.2545	7.45206
AMOTL2	4.83011	4.59426	35.297	50.3793	38.9933	42.7276	35.1979	38.3633	4.35531	34.7441	39.937	23.8514
AMPD1	0	0	0	0	0	0	0	0	0.0222966	0	0	0.0357623
AMPD2	10.985	10.0506	8.97771	11.7044	11.6236	9.68846	23.634	25.1154	14.2193	14.8294	19.5039	20.752
AMPD3	0.0413455	0.0698098	0.0620431	0.360766	0.950669	0.103233	4.1633	5.18583	0.0646217	0.0250383	0.0978287	0.93183
AMPH	32.3601	32.3612	50.1551	23.2482	34.7454	27.4444	14.9845	11.3677	0.094927	0.0153224	0.0739286	0.621139
AMT	0.371309	0.264167	0.992852	1.51811	0.251464	1.78785	0.822591	1.79553	0.160933	0.189687	0.0980334	1.71885
AMTN	0	0	0	0	0	0	0	0	0	0	0	0.0495523
AMY1A	0	0	0	0	0	0	0	0	0	0	0	0
AMY1B	0	0	0	0	0	0	0	0	0	0	0	0
AMY1C	0	0	0	0	0	0	0	0	0	0	0	0
AMY2A	0	0	0	0	0	0	0	0	0	0	0	0
AMY2B	0	0.0271169	0.237884	0.316335	0.028026	0.17112	0	0.0576761	0.0775162	0	0.0882962	0.563167
AMZ1	0.0124044	0.0376991	0.139604	0.161794	0.271944	0.0530936	0.666145	0.695387	0	0	0	0.0559192
AMZ2	39.9707	35.7646	40.8094	35.6067	38.9645	29.7951	52.7753	50.4278	78.7431	76.464	60.9192	74.2892
AMZ2P1	1.00018	0.915178	2.72331	2.46755	1.66726	2.12322	1.05883	1.05791	3.5702	3.7808	4.43582	3.36948
ANAPC1	14.1754	13.8686	5.08107	5.75628	6.60284	6.4191	7.71343	6.89531	16.3758	9.51909	7.1492	7.99823
ANAPC10	4.71841	4.91238	3.12722	3.77148	4.86701	3.73032	3.44618	3.71849	6.86368	7.01615	6.69635	7.62811
ANAPC11	90.1567	85.2188	108.703	88.9532	107.46	74.969	99.1671	98.727	104.985	143.954	95.0577	162.388
ANAPC13	26.9983	23.2638	36.3476	31.1907	33.7812	27.8066	37.349	36.9934	33.0428	33.7226	48.0522	41.1251
ANAPC15	60.0156	62.4375	51.6768	38.0937	46.4877	27.617	28.9611	26.158	22.9024	27.9241	13.7574	32.1255
ANAPC16	13.2083	12.8629	19.7566	17.4347	19.9144	19.2344	25.077	26.0601	10.2305	11.9371	10.5709	13.6689
ANAPC1P1	0.0333343	0.0337694	0.0375156	0.079052	0	0	0.079561	0.0705171	0	0.0605619	0	0.0500903
ANAPC2	7.32462	6.78421	11.5643	10.4222	9.48178	9.3381	10.9638	11.599	8.53692	16.3301	14.3289	16.0065
ANAPC4	4.4658	4.41688	3.90644	4.41693	3.07124	5.5713	4.0665	4.99223	6.01387	4.67198	4.38221	6.42437
ANAPC5	62.9799	64.0344	41.4725	40.0139	49.4612	41.9957	47.0879	49.4032	66.0291	64.8515	68.6086	70.3089
ANAPC7	17.0567	16.1766	10.8194	10.4024	12.5705	11.0161	11.8489	13.3082	27.6053	32.183	24.6549	28.1635
ANG	1.3583	0.98349	2.07249	1.83042	2.41733	3.00294	4.51868	4.71466	4.17416	5.80339	3.29134	4.44305
ANGEL1	3.7836	3.33186	5.70268	4.91442	5.15025	5.22176	5.93527	5.69898	6.94583	6.09679	11.1606	3.4354
ANGEL2	6.07549	7.32147	5.18439	4.86304	5.4838	6.07356	5.34312	6.41378	3.18481	3.66154	2.48464	1.89829
ANGPT1	1.27619	0.934604	0.0569024	0.344597	0.738691	0.270413	11.0405	10.7077	1.5768	0.849791	0.553691	0.398726
ANGPT2	0.117024	0.204769	0.167621	0.176604	0.122168	0.136605	0.063479	0.112518	0.319274	0.0773125	0.1282	0.503719
ANGPT4	0	0	0	0	0	0	0.0725682	0	0	0	0	0.0228439
ANGPTL1	0.203189	0.126671	0.985065	0.333595	0.293705	0.401395	1.21241	1.28951	0.0293144	0	0	0.0352297
ANGPTL2	0	0	0.0349093	0.0183902	0	0.0165957	0	0	1.27988	1.69063	3.09227	0.0116526
ANGPTL3	0.0271774	0	0	0	0	0.0290812	0	0	0	0.024688	0	0
ANGPTL4	2.58331	2.14906	3.87534	5.00275	9.05106	6.24449	27.7548	29.5351	0.0309005	0.119744	0.108305	0.0990384
ANGPTL5	0	0	0	0	0	0	0.057612	0.178721	0	0	0	0.0362716
ANGPTL6	3.85521	3.52138	8.89096	5.02093	4.94837	4.97062	5.09097	5.04705	2.16324	1.17693	2.83868	3.775
ANGPTL7	0.179766	0.0520322	2.659	16.9917	16.7025	18.6039	0.429059	0.32596	2.55277	487.964	341.429	96.05
ANHX	0	0	0	0	0	0	0	0	0	0	0	0
ANK1	0.394775	0.267044	0.0935349	1.16725	1.56037	0.481749	3.58739	4.31584	0	0.00629041	0.00758626	0.656454
ANK2	4.27478	4.73945	17.8013	11.5777	7.26601	6.95066	2.88042	1.08645	18.8748	14.4539	22.3401	3.52669
ANK3	0	0	0.0321679	0.115237	0.856355	1.12725	0.477568	0.26018	0.0375257	0.34334	3.33978	3.48104
ANKAR	0.049606	0.11307	0.0837426	0.0441151	0.15536	0.106162	0.147997	0.170526	0.232594	0.146452	0.0951015	0.204988
ANKDD1A	0.772123	0.764011	1.21252	2.27821	2.30572	2.22885	1.28573	1.13957	1.46498	0.831892	0.786852	1.20072
ANKDD1B	0.0440799	0	0.198437	0.41814	0.138053	0.235839	0.210416	0.139873	0.0413367	0.0800846	0.14487	0.397424
ANKFN1	0	0	0	0.167248	0.0736243	0.0251549	0.0841622	0.0248651	0	0.0213548	0	0
ANKFY1	11.7617	11.8748	20.4377	15.5664	13.9509	13.832	13.3335	12.3957	8.50412	12.9239	18.8018	8.33734
ANKH	9.30743	9.11154	6.72863	9.12464	16.217	17.1322	65.2545	75.3749	15.0632	4.98044	6.93581	3.53572
ANKHD1	17.8081	18.7327	11.2399	14.2046	11.951	14.5531	10.2484	10.2907	14.4454	10.6916	7.62153	12.4808
ANKHD1-EIF4EBP3	12.6714	10.6561	11.3242	9.96083	9.84069	10.8757	14.6762	14.8708	12.0513	12.5092	12.6063	11.4868
ANKIB1	13.181	12.7138	19.0556	16.0403	16.776	19.3067	28.0975	26.718	27.3469	20.4997	20.3794	7.63284
ANKK1	0.0446644	0.0452474	0.0502669	0	0	0.0238966	0.0266508	0.0472427	0.0209424	0.0608598	0.0489301	0.201347
ANKLE1	0.346731	0.263443	0.234134	0.349465	0.0904932	0.371021	0.289647	0.238385	4.06441	1.49611	0.626746	4.24632
ANKLE2	14.5998	16.1463	12.2715	12.9728	12.5368	12.4691	14.5217	14.3126	14.0482	13.7421	12.0394	14.3644
ANKMY1	2.61812	2.71328	2.82134	2.37305	2.07138	2.5168	2.0569	2.20296	0.653104	0.546664	0.582195	1.17697
ANKMY2	12.1311	11.7718	13.7028	10.9069	11.3191	10.1993	14.8748	15.4635	14.5223	12.6548	9.39531	9.34823
ANKRA2	1.75514	1.85766	4.68764	4.3176	3.3364	4.12058	5.4083	5.92957	3.43921	4.56894	3.90292	3.68053
ANKRD1	0.0295112	0.0298965	0.033213	0.209957	0.215659	0.126314	0.105654	0.249719	0.0276747	0.107232	0.355627	29.8002
ANKRD10	5.81402	6.69833	12.1372	12.7606	8.90207	19.0543	10.8565	12.9263	9.10838	7.37335	6.24441	15.4345
ANKRD10-IT1	1.38561	3.07224	2.67749	6.44793	1.47381	8.92404	2.65194	4.28618	1.86326	0.949957	1.17426	2.18032
ANKRD11	20.6418	20.4449	15.4795	17.9097	19.1248	19.7028	38.8827	38.7353	25.9654	29.7481	22.5071	54.2099
ANKRD12	2.41918	2.29307	2.47493	3.15176	2.45156	4.57734	2.73872	3.21203	6.57051	4.91409	9.743	10.207
ANKRD13A	8.78102	8.53867	13.9751	11.9998	11.0063	8.0991	14.9197	14.3866	12.5567	13.5463	15.9967	5.39023
ANKRD13B	6.10494	5.95293	5.8609	6.0498	5.12435	4.87592	3.08637	3.29381	8.92574	6.92019	11.9883	12.2668
ANKRD13C	4.40791	3.90363	4.63799	5.38538	4.89115	5.83192	5.87649	6.34122	4.08876	5.2636	6.38964	2.53594
ANKRD13D	21.649	19.7913	26.0041	23.6237	18.9803	21.3467	15.5261	18.5263	7.18744	6.33152	8.6945	18.3765
ANKRD16	5.03509	5.40562	2.9629	2.27638	3.23052	1.9013	2.46078	2.51977	4.06953	3.19858	2.41537	5.35758
ANKRD17	17.4247	17.2508	15.8714	15.1242	14.0243	15.2488	15.9993	15.7907	19.914	21.8657	29.0791	10.074
ANKRD18A	0.0443422	0.0299473	0.0166348	0.0525785	0.0617218	0.110713	0.0881951	0.250143	0.263357	0.25511	0.0647695	0.555262
ANKRD18B	1.08915	1.20774	0.0662578	0.209425	0.291939	0.519727	0.245903	0.140111	0.579697	0.160441	0.0483718	0.707732
ANKRD18CP	0	0	0	0	0	0.0199765	0	0.0197464	0.0175069	0	0	0.0981849
ANKRD18DP	0	0.0196498	0	0	0.0607477	0	0	0	0	0.0352398	0	0.0437199
ANKRD19P	0.397413	0.150975	0.195678	0.294519	0.103721	0.212626	0.177849	0.210177	0.372681	0.180505	0.435368	1.28767
ANKRD2	0	0.0460895	0	0.161851	0	0.179292	0	0.144377	0	0	0	0.615345
ANKRD20A1	0.0157953	0	0	0.0187292	0.0164896	0.0169018	0	0.0167071	0.0740616	0.0717425	0.0173039	0.0237351
ANKRD20A11P	0.117249	0.237559	0.0659783	0.0695138	0	0.250926	0	0.186026	0.164929	0.159764	0.128447	1.10117
ANKRD20A12P	4.40944	4.22646	3.47378	3.01642	2.08917	2.50434	5.99073	7.10359	0.159039	0.0308119	0.0743164	0.254843
ANKRD20A19P	0.0912873	0.0612464	0.136081	0.153813	0.0420765	0.163662	0.0127425	0.106579	0.11339	0.179397	0.152076	0.831834
ANKRD20A2	0.0315906	0	0.0177766	0	0	0	0.0188498	0.0167071	0.044437	0	0	0.0237351
ANKRD20A3	0.152815	0.0985156	0.218889	0.280037	0.188539	0.118924	0.182367	0.0881656	0.0911943	0.0504792	0.0456574	0.0313133
ANKRD20A4	0	0	0.0177444	0	0.0164598	0	0	0	0.206997	0.0429675	0.103635	0.426458
ANKRD20A5P	0.0149115	0.0302123	0.016782	0.0530438	0.077835	0.0478684	0.0355902	0.0315446	0.0139835	0.040637	0.130685	0.60499
ANKRD20A8P	0.0301414	0.0610697	0.0848056	0.12509	0.0943991	0.306403	0.0179851	0	0.113063	0.0821416	0.148591	0.384986
ANKRD20A9P	0.443181	0.545274	0.379193	0.664749	0.344443	0.746497	0.53222	0.59298	0.549327	0.436877	0.479382	1.47056
ANKRD22	0	0.0559671	0	0.0327538	0	0.0295581	0.0164824	0.0292176	0.012952	0	0.0151306	0.166033
ANKRD23	0.351455	0.578569	0.667474	1.09393	0.481562	1.15173	0.576702	0.580849	0.617968	0.538756	1.56415	3.11921
ANKRD24	0.0273339	0	0.292245	0.162055	0.0713386	0.190117	0.0652395	0.101191	0.089715	0.235887	0.583917	0.646911
ANKRD26	3.35259	3.50179	2.31679	2.73248	2.15637	3.45222	3.73673	3.94235	2.01936	1.70349	1.11453	5.7431
ANKRD26P1	0	0.00894019	0	0	0.00921292	0.00944321	0.0105316	0.0280033	0	0	0	0.0530441
ANKRD26P3	0.13348	0.0600987	0.0333829	0	0.015483	0	0	0.0156872	0	0	0	0
ANKRD27	22.829	22.7285	9.69873	9.1106	10.588	9.33984	11.3405	10.7666	35.9688	13.2111	9.83136	11.0099
ANKRD28	23.9279	23.907	17.1948	21.698	16.9278	15.3608	22.0835	22.2463	31.7438	43.2252	19.4591	7.19038
ANKRD29	0	0.0255637	0.0283996	0.448821	0.684931	0.189014	1.86707	2.08189	0.970219	0.389689	0.138222	1.00485
ANKRD30A	0	0	0.0559746	0.0589741	0.0908638	0.05322	0.0741923	0.0394552	0.0116602	0.011295	0	0
ANKRD30B	0.0355099	0.0599558	0.106571	0.112282	0.148283	0.215319	0.113005	0.225359	1.5207	0.451602	0.557586	2.97924
ANKRD30BL	0.983947	0.780097	0.144439	0.507265	0	0.0824771	0.255266	0.180999	0.0802359	0.310894	0.187464	0.674987
ANKRD30BP2	0.0974838	0.0493781	0.0365706	0.0963258	0.033923	0.0347709	0.0193892	0.103111	2.91011	0.3247	0.195789	0.964364
ANKRD31	0.0358266	0.0453678	0.0504007	0.0318609	0.0748029	0.143761	0.0427547	0.0947368	0.11759	0.105771	0.107933	0.1144
ANKRD32	3.22761	3.00581	1.02621	1.02972	1.48076	2.26117	1.3818	1.22473	4.00399	2.74789	1.66487	3.91481
ANKRD33	0	0	0	0	0	0	0	0	0	0	0	0
ANKRD33B	0.81251	0.991216	0.276904	0.413867	0.627209	0.740851	3.95364	3.91577	1.18584	0.49379	0.451323	0.520185
ANKRD34A	0.781687	0.947163	0.569243	0.726966	0.784046	0.770843	2.89	2.12377	2.51533	0.793626	0.654851	0.817624
ANKRD34B	0	0.014183	0.0157564	0.0166008	0.0292314	0.0299621	0	0.0148085	0.013129	0.0254358	0.168712	0
ANKRD34C	0	0	0	0	0	0	0	0	0.018768	0.0363606	0.0767371	0
ANKRD35	0	0	0	0	0	0	0.13813	0.0874492	0.0155063	0	0	0
ANKRD36	0.826806	1.02082	0.484644	1.04165	0.368637	1.49297	1.00725	0.938302	0.839964	0.375536	0.754809	3.28722
ANKRD36B	0.885342	1.10739	0.274517	0.567743	0.339524	0.754023	0.517493	0.592447	0.652335	0.402123	0.554227	2.34852
ANKRD36BP1	8.51724	9.29704	2.40525	3.05587	3.18262	5.41453	3.67565	3.49054	6.74932	3.82571	3.54635	0.59034
ANKRD36BP2	0.68415	0.51981	0.269489	0.121684	0.428534	0.183019	0.122468	0	0.128315	0	0	0.359817
ANKRD37	1.21642	1.01483	2.09376	1.78174	1.41929	1.6079	1.02469	0.529791	0.536807	0.714997	0.627102	1.02146
ANKRD39	20.1132	17.7908	7.60169	6.22925	11.0471	8.4322	6.53805	5.87424	23.5769	23.1113	26.3094	28.5318
ANKRD40	23.2785	23.6892	22.6105	28.0554	27.7126	30.2097	26.8526	24.1764	23.2753	33.4607	49.214	16.3418
ANKRD42	0.287979	0.426387	0.27424	0.525338	0.393142	0.426673	0.634465	0.93724	0.810172	1.24764	1.43181	1.1817
ANKRD44	4.43752	5.34151	3.99795	1.84995	2.05049	1.90738	2.1272	1.53923	25.966	44.7154	20.9539	3.3736
ANKRD45	0.275255	0.150149	0.309782	0.426808	0.15473	0.339851	0.176876	0.201562	1.23106	0.71166	0.695871	0.3818
ANKRD46	2.38925	2.91497	3.47252	4.10465	2.95576	3.11929	1.74884	1.87581	1.96032	1.7102	2.86878	1.20253
ANKRD49	1.99604	2.20875	1.8317	2.11191	2.11584	2.03729	1.35593	2.01382	4.14681	2.59428	3.09499	4.22221
ANKRD5	0.937519	1.00558	1.20716	1.20326	1.34986	0.874385	3.00885	4.03228	0.041329	0	0.0482822	0.0110314
ANKRD50	6.75885	7.12416	9.7751	8.46832	6.41508	8.53961	4.96864	4.211	7.4098	10.5237	15.3081	3.09667
ANKRD52	32.477	33.0326	18.5502	21.7133	20.8718	18.3118	20.1937	18.8788	16.5117	19.2901	22.8368	13.2151
ANKRD53	0.0875896	0.059154	0.46004	0.242344	0.274328	0.204206	0.162673	0.123529	0.0547576	0.159136	0.287874	0.285181
ANKRD54	33.5385	32.5132	30.1902	17.5629	20.4262	15.0725	15.947	13.732	48.2831	63.2382	34.5154	38.5722
ANKRD55	0.0455009	0.0230474	0	0.0269762	0.0237505	0.0730325	0.13575	0.168446	0.149342	0.0619996	0.0249232	0.27349
ANKRD6	3.21467	3.18975	3.04084	2.22828	2.18957	2.42827	1.10447	0.762726	3.1477	1.32652	1.57098	1.28627
ANKRD60	0	0	0	0	0	0.0557822	0	0	0	0	0	0
ANKRD62P1-PARP4P3	0.0782544	0	0.0880703	0	0.0408471	0.125604	0.0466936	0.0827717	0.0366922	0.10663	0	0.705541
ANKRD63	0	0	0	0	0.0580731	0.0595248	0	0.0588391	0	0	0.243763	0
ANKRD65	0.146286	0.222312	0.0411391	0.173466	0.0381587	0.234702	0.087278	0.116044	0.203113	0.0664289	0.200335	0.714531
ANKRD7	0.271584	0.229274	0.815069	0.214686	0.519791	0.242175	0.432138	0.718154	3.48066	1.85031	0.84298	0.748184
ANKRD9	12.5261	12.8756	15.875	11.0198	15.8377	8.80468	13.5456	12.0058	17.1203	18.2527	12.2334	18.2705
ANKS1A	82.4954	89.2711	18.0082	14.6103	20.4393	19.2407	11.4998	8.88934	17.4278	13.9565	12.0555	4.08613
ANKS1B	6.86215	7.03533	12.4853	7.40918	5.12263	4.69117	1.54748	0.842909	5.59416	9.29243	6.97023	6.11913
ANKS3	4.48398	4.20371	3.49567	4.91089	4.13658	5.07435	5.49191	6.29107	3.11839	4.22	4.45338	15.8964
ANKS4B	0.077328	0.156675	0.261083	0.297997	0.161454	0.289607	0.115352	0.20448	0.235676	0.193173	0.0423566	0.668139
ANKS6	3.22755	3.23157	2.72642	2.87252	2.59972	2.66471	2.81021	2.86478	2.20123	1.83843	2.17588	3.07502
ANKUB1	0	0	0	0	0	0	0	0	0	0.0417697	0	0
ANKZF1	8.2318	8.62024	13.0584	12.6592	8.77883	11.4865	10.9363	10.8659	9.41603	8.1803	6.51286	16.1089
ANLN	59.8771	57.4368	9.48893	25.7599	45.7055	53.14	37.0387	25.7497	64.4757	69.4299	35.7431	15.8669
ANO1	3.26669	2.68758	0.842954	1.07072	5.15442	7.95582	1.30106	0.0720189	0.028899	0.0206174	0	0
ANO1-AS2	0	0	0	0	0	0	0	0	0	0	0	0.097869
ANO10	11.6705	10.7474	19.7147	20.2368	20.5716	16.2606	18.2556	19.8786	6.48216	7.16867	9.29583	6.95739
ANO2	0	0.0150632	0.0167342	0.105786	0.201795	0.254571	2.3955	2.78375	0.0278875	0.0135071	0.0488675	0.178746
ANO3	0.0091129	0.0276956	0.061536	0.0432223	0.0570809	0.0487564	0.0217503	0	0.222191	0.248345	0.079866	0
ANO4	9.52397	10.2834	5.53946	3.21075	3.96869	3.5826	1.2098	0.155198	29.183	9.42709	2.23577	0.972129
ANO5	0	0.0081972	0.00910656	0.0191891	0.0337891	0.0346337	0	0.00855868	0.682922	0.294016	0.177288	0
ANO6	17.8058	17.3961	24.5851	31.6753	31.6536	38.5417	27.942	24.3977	25.8825	20.4158	28.4114	6.68939
ANO7	0.439286	0.418049	0.254685	0.189411	0.22235	0.27064	0.222403	0.168962	0.79893	0.483695	0.379159	0.470071
ANO8	1.44215	1.27333	4.89894	5.36541	3.81221	6.07362	4.64207	4.96806	3.1887	4.02632	5.07304	2.66411
ANO9	0	0	0.0440189	0	0	0.0209263	0	0.0206853	0	0.017765	0.0428482	0
ANP32A	70.2853	68.0459	54.0592	42.8881	47.8804	38.9506	50.519	49.7082	78.2493	66.0699	43.8471	88.9839
ANP32A-IT1	0.407423	0.756693	0.382108	1.08698	0.194944	0.635781	0.445693	0.556634	0.238793	0.185052	0.20457	1.47953
ANP32AP1	0.29345	0	0	0	0	0.104669	0	0	0	0	0	0
ANP32B	151.085	137.666	99.9753	88.1059	101.691	95.2532	79.6294	72.0637	177.771	217.505	154.621	312.438
ANP32C	0	0	0	0.123625	0	0.111563	0.124421	0	0	0	0	0.156667
ANP32D	1.63143	0.275455	0.306012	0.32241	0.567715	0.872859	1.29795	0.862805	0.764952	1.235	0.297874	1.02146
ANP32E	32.2794	28.3039	8.92034	10.0465	15.3909	15.4144	12.6772	11.6768	31.6009	23.5719	9.82792	27.6163
ANPEP	0.318322	0.353189	0.767681	8.32184	21.2998	1.76799	117.419	136.988	24.35	12.9711	2.12555	52.1267
ANTXR1	25.3714	25.6066	69.021	120.964	115.756	158.979	107.707	98.8274	22.4593	25.1327	87.3679	32.9279
ANTXR2	2.43475	2.51704	5.7039	5.83312	6.71799	5.21035	15.2694	17.1069	2.44125	6.88425	6.99463	1.60229
ANTXRL	0	0	0	0	0	0	0	0	0	0.021917	0.0264313	0.0181274
ANXA1	72.7789	64.2526	158.356	194.778	223.554	229.75	180.852	189.468	22.9139	18.8212	165.158	243.487
ANXA10	0	0	0	0	0	0.044967	0	0	0	0	0	0.726187
ANXA11	120.965	113.686	119.166	112.852	142.262	105.448	183.289	177.991	38.3774	39.5917	41.9187	58.0537
ANXA13	0	0	0	0	0	0.0441462	0.0492346	0	0.154764	0.187398	0.0903964	0.0619954
ANXA2	278.773	263.889	1561.55	2047.39	1552.31	1447.33	873.731	797.257	286.44	1005.51	1432.27	1283.98
ANXA2P1	0.366881	0.325211	1.23984	1.79449	1.72354	1.81569	0.711471	0.970149	0.516074	1.37476	1.55744	1.44716
ANXA2P2	0.236142	0.574139	0.690984	1.45602	0.887481	0.960202	0.507253	0.699367	0.354314	0.600634	0.931303	0.674202
ANXA2P3	0	0	0.0512974	0.108093	0.142751	0.048773	0	0.0964223	0	0.041405	0.0499332	0.0342458
ANXA2R	0.0491852	0.149482	0.0553548	0.174963	0.564819	0.684199	0.469573	0.780367	0.276745	0.357439	0.323296	1.36731
ANXA3	0.147765	0.0748467	0.0415749	0.0438028	0.038565	0	0	0.0390736	11.3973	1.44297	0.364224	0
ANXA4	32.5323	28.9704	40.6778	35.5069	40.6873	28.3797	42.265	39.0857	17.0863	17.5062	22.3816	13.8515
ANXA5	676.506	664.473	739.957	575.327	619.385	447.833	365.213	301.559	927.748	1019.04	696.651	633.052
ANXA6	119.651	115.674	178.044	126.797	156.373	114.943	172.753	165.77	29.6234	37.7754	32.1425	67.0419
ANXA7	46.2535	46.6935	44.5919	46.7893	64.2587	51.2122	60.0154	60.5067	37.0548	40.1635	41.5455	32.4884
ANXA8	0	0	0	0	0	0	0	0	0	0	0	0
ANXA8L1	0	0	0	0	0	0	0	0	0	0	0	0
ANXA8L2	0	0	0	0	0	0	0	0	0	0	0	0.193435
ANXA9	0.838337	0.587963	1.05236	1.45285	1.8177	2.31167	1.34677	1.60294	0.907114	1.11303	1.58955	0.532967
AOAH	0.0244265	0	0	0	0	0	0	0	0	0	0	0.0734201
AOAH-IT1	0	0	0	0	0	0	0	0	0	0	0	0
AOC2	0.89984	1.03218	0.621247	0.654543	0.221582	0.211358	0.886538	0.718419	0.885004	0.61805	1.06973	2.36021
AOC3	0.205004	0.138454	0.12305	0.291699	0.114142	0.23399	0.0326197	0.231294	0.256328	0.0869057	0.194639	0.626375
AOC4	0.0279481	0.113251	0.0314538	0.0994178	0	0.0897177	0.0333526	0.0295614	0.0524175	0.0253881	0.0612346	0.272978
AOX1	0.0441735	0.022375	0.0745717	0.392839	0.622556	0.035451	1.81869	1.76381	0.0207122	0.0401273	0.0362942	0.356782
AOX2P	0.0147807	0	0.0166348	0	0.0154305	0.0316323	0.017639	0.015634	0	0	0.0161924	0.0555262
AP1AR	6.13702	6.47762	4.56558	3.16576	2.84353	2.59553	2.81251	2.65627	11.1773	7.87916	7.47042	2.72846
AP1B1	57.1052	55.87	31.442	32.139	38.7252	28.3063	53.0958	46.192	79.3148	74.4657	53.5872	32.607
AP1B1P1	0.083843	0	0	0	0	0.0897165	0	0	0	0	0	0.125988
AP1G1	25.2396	24.158	18.7038	21.4943	19.794	20.999	25.3872	26.6536	17.4482	18.972	20.6072	10.0729
AP1G2	4.20304	4.55497	4.26823	3.68565	2.89799	4.33013	9.00516	10.2767	8.10294	6.46406	4.43313	12.5581
AP1M1	58.8645	59.2957	49.2216	48.3175	56.0701	43.889	56.7033	52.9386	25.3138	36.7334	36.5264	32.1024
AP1M2	0.0337653	0	0.0380006	0.480444	0.281996	0.325175	1.16855	1.21429	0.0316639	0	0	0.431272
AP1S1	125.927	117.259	121.231	99.9605	129.966	85.7073	151.762	154.174	200.104	155.895	135.912	143.338
AP1S2	40.5769	39.9612	38.9935	18.7987	29.377	23.4438	16.581	10.7365	97.0731	114.917	83.5098	28.0139
AP1S3	4.7449	4.17985	1.19184	1.8591	1.39271	2.16337	1.18173	0.872835	3.12117	2.59866	3.49551	4.278
AP2A1	53.9335	53.5068	54.1542	55.1321	58.5507	48.9874	82.3749	77.0284	39.2001	50.6832	44.7952	29.1451
AP2A2	25.977	25.6042	39.8607	33.2665	29.4128	23.7392	27.5965	26.8437	17.2847	22.0078	27.4682	17.596
AP2B1	42.6891	42.2321	51.8796	49.0713	49.209	43.7656	67.7998	64.7399	40.3145	51.8649	52.4316	42.4181
AP2M1	208.237	200.152	271.067	229.087	281.052	199.919	371.894	373.588	234.42	350.728	307.349	268.005
AP2S1	199.22	192.408	167.251	122.699	208.14	140.223	262.517	286.436	152.86	174.098	148.603	283.274
AP3B1	24.4602	23.1564	20.8755	18.1784	20.013	22.0208	30.3276	29.7435	24.8289	19.9864	17.0522	12.2657
AP3B2	0.0895203	0.136033	0.134333	0.176914	0.124607	0.367202	0.178053	0.157813	1.90286	1.68064	1.91238	3.77774
AP3D1	95.2839	94.624	69.932	56.8886	54.4158	40.8776	56.4934	54.3932	62.4466	69.6978	54.0508	67.637
AP3M1	17.5566	17.1254	18.9205	17.8746	17.6906	18.5099	18.4784	17.2569	13.4471	14.2401	12.5804	6.60252
AP3M2	10.3023	11.2446	11.647	6.7264	7.79628	4.97093	3.80567	2.90279	23.1475	18.523	31.5758	16.7947
AP3S1	44.0504	40.7237	41.232	36.0205	43.0718	33.4333	57.0502	53.9769	31.2414	31.0503	34.334	36.6413
AP3S2	3.4449	3.94028	5.35821	5.0496	4.20557	6.26389	6.8123	6.52963	8.51497	10.2752	13.0077	6.54264
AP4B1	11.2843	12.0888	8.15999	8.64112	8.75794	8.79604	10.0965	11.8401	3.75306	3.74549	3.15783	7.29168
AP4B1-AS1	0.307265	0.587965	0.384229	0.607228	0.106923	0.840237	0.48891	0.650003	0.22411	0.279119	0.112203	2.23162
AP4E1	4.14375	4.33328	2.95955	3.36381	2.83308	4.0759	4.54566	4.29867	3.06147	3.20497	2.77608	3.13726
AP4M1	5.55623	6.74181	10.634	9.37994	10.88	9.13656	13.9357	13.5137	6.44686	11.0642	8.94119	9.59919
AP4S1	1.62943	1.38464	1.66715	1.75137	1.7946	2.00862	2.23436	2.83221	1.6679	2.45901	2.0722	3.55801
AP5B1	17.2946	17.4789	26.5928	29.171	19.1214	18.4099	10.9437	10.7199	5.34222	8.73874	11.1386	8.24713
AP5M1	5.89022	4.97869	7.86948	5.4846	5.94165	6.63152	7.09395	7.24313	9.9968	10.8491	11.2231	3.47524
AP5S1	10.977	12.0021	17.2109	13.9664	14.9323	11.5278	13.1957	11.4381	5.21234	9.40549	9.02643	8.28755
AP5Z1	9.50356	10.0059	16.9781	15.6854	13.0198	12.6301	11.6346	12.4742	6.0643	8.28487	13.2213	17.7585
APAF1	3.48384	3.44487	3.07158	2.97969	2.62036	4.0319	2.12885	2.17468	6.76916	3.60065	2.76845	1.66855
APBA1	1.36728	1.2856	2.10087	1.35913	1.9915	1.62952	0.390824	0.147219	0.583514	1.85935	7.82121	0.848895
APBA2	14.4764	15.3504	16.9668	17.4205	15.6101	15.5234	6.18044	3.70611	7.94068	6.88234	15.354	11.35
APBA3	8.31375	8.42227	15.464	13.0912	11.3583	8.98197	9.50674	9.27435	4.13633	6.26519	6.70636	8.45573
APBB1	27.3799	27.0843	35.3044	30.0011	31.455	24.2746	27.7833	27.2716	29.565	18.4632	20.8546	16.8738
APBB1IP	0	0	0	0	0	0	3.12578	2.56609	0	0.0195028	0	1.16141
APBB2	1.1388	1.14037	2.54059	2.84643	3.00365	3.62878	8.88485	8.46965	2.14457	5.17287	4.53035	2.04217
APBB3	3.44249	3.95425	6.03491	8.43182	3.99007	8.6147	3.80005	5.82866	1.60145	3.47197	3.02896	11.3964
APC	13.477	14.6382	13.8812	13.0726	10.5544	11.8737	8.55322	8.4436	18.4674	19.7769	12.1679	3.36985
APC2	0.577649	0.659668	2.29311	2.36617	2.01196	1.85434	1.27217	1.23865	1.73837	3.77811	4.88996	1.40066
APCDD1	4.49691	4.84734	3.26595	6.88193	16.9976	2.9156	58.8731	63.9198	8.24714	53.6886	33.3199	2.49656
APCDD1L	0.0179625	0.018197	0	0.042598	0.243778	0	0.192925	0.132996	0	0	0	0.0674792
APCDD1L-AS1	0	0	0	0.0654728	0.0576438	0.0590847	0.0988416	0	0	0	0.0604902	0.518576
APCS	0	0	0	0	0	0	0	0	0	0	0	0
APEH	96.0437	97.8154	65.3242	49.0601	64.0965	40.0933	54.1842	52.676	44.2278	37.585	30.3819	28.2589
APEX1	103.491	101.999	132.586	82.2741	101.818	78.5635	83.2888	84.5847	134.76	151.703	127.609	102.632
APEX2	17.3527	17.5195	11.638	10.0609	13.6558	8.82704	12.1649	11.5923	19.4224	19.2156	15.2015	23.5962
APH1A	74.2091	69.1177	104.925	79.3901	93.7965	71.8299	66.9759	59.297	86.2183	108.355	104.963	72.41
APH1B	4.04794	3.92514	9.57573	6.2495	5.26311	7.08433	6.87591	7.08643	2.17041	1.81899	1.50627	0.584455
API5	57.6673	57.9748	34.0661	36.0001	34.9589	33.4055	24.1261	23.8577	33.9654	32.0938	28.6119	22.574
APIP	53.819	52.7158	23.9048	18.7866	25.4821	17.9602	15.3033	14.6635	22.1472	17.4958	20.3401	10.4531
APITD1	11.8376	10.702	2.99379	5.04208	5.83511	6.3001	5.94546	8.39698	7.56467	10.1859	7.7269	13.4455
APITD1-CORT	1.40988	1.6185	0.435645	0.800817	1.52997	0.82756	1.09342	0.832274	0.608682	1.63663	1.39572	2.18717
APLF	0.444249	0.348424	1.06446	0.849623	0.912594	0.843398	1.12872	0.788209	0.591306	1.27576	0.926258	0.721393
APLN	0.691855	0.858585	0.389319	0.389673	0.469474	0.425685	0.206411	0.237833	0.17842	0.471362	0.341069	0.831702
APLNR	0.0142214	0.0304117	0.672286	0.533456	0.32663	0.670388	0	0	0	0	0.0934776	0.0534249
APLP1	8.02989	7.21781	11.3704	14.58	21.7065	23.2623	32.6468	32.3073	4.5171	5.26411	10.432	13.644
APLP2	98.2524	98.7493	116.299	104.867	132.225	110.464	144.296	153.002	212.398	228.583	177.958	114.936
APMAP	96.1569	92.952	78.6354	102.533	124.635	126.697	145.719	144.522	50.0771	63.0476	64.8838	47.1261
APOA1	0	0	0	0	0	0.0806544	0	0	0	0.20541	6.52326	0.283156
APOA1BP	67.7283	69.9396	71.5441	49.7791	71.3002	38.5222	45.4772	43.8625	112.39	105.145	89.7351	116.367
APOA2	0.194174	0	0	0	0	0	0	0	0.72836	0	0	0.145889
APOA4	0	0	0	0	0	0	0	0	0	0	0	0
APOA5	0	0	0	0	0	0	0	0	0	0	0	0.0230087
APOB	0	0	0	0	0	0	0	0	0	0	0	0
APOBEC1	0	0	0	0	0	0	0	0	0	0	0	0
APOBEC2	0	0.0740093	0.0411098	0.216564	0	0.11726	0	0.193182	0	0.0995459	0.160066	0.329335
APOBEC3A	0.0880763	0.490785	0.0991252	0.261108	0.183906	0.235631	0.26279	0.326087	0.165198	0.240042	0.144738	0.761079
APOBEC3B	50.7889	46.2925	7.97652	12.3042	30.321	22.0684	22.3364	21.5783	68.3268	62.1413	41.7193	49.6716
APOBEC3C	49.1786	49.4192	54.2009	51.4687	59.6115	41.9657	120.754	112.954	55.7238	92.4324	82.7661	58.1242
APOBEC3D	0.386253	0.322242	0.383561	0.511879	0.687865	1.16699	2.41319	2.61952	1.02272	1.01134	1.51833	2.54356
APOBEC3F	1.18716	1.65468	3.64793	3.30601	3.78325	3.54491	9.3276	10.4026	4.23803	6.78034	8.49116	6.22924
APOBEC3G	0.256367	0.129857	0.901641	0.911959	3.2451	4.01203	11.5494	12.1347	0.751291	0.46577	1.89575	0.0240772
APOBEC3H	0.0619351	0.125634	0	0.0734404	0.838932	0.796397	0.592068	0.784613	0.442182	0.218157	0.263091	0.0930719
APOBEC4	0	0	0	0	0	0	0	0	0	0	0	0.0762056
APOBR	0.0291166	0.0294966	0.0163844	0.0517872	0.0455947	0.0934687	0.0868678	0.0769934	0.0136523	0.0264495	0.0318974	0.17501
APOC1	8.94256	8.23571	2.97354	3.13288	6.36521	4.7845	8.0039	7.09408	866.239	141.791	37.1827	34.9685
APOC1P1	0.366977	0.371767	0.275339	0.145045	0.127699	0.26179	0	0.129384	2.53651	0.111116	0.134007	0.551447
APOC2	0	0	0.895724	0	0.207734	0	0.118729	0.210469	609.842	127.345	23.652	5.53169
APOC3	0	0	0	0	0	0	0	0	0	0	0	0.119284
APOC4	0	0.128748	0.142956	0	0	0	0.151659	0.134419	7.15268	0.230896	0.139227	0.286459
APOC4-APOC2	0	0	3.95e-05	0	0	0	3.06e-06	3.06e-06	0.896614	0	0	0
APOD	29.6146	22.7438	56.5647	46.6199	54.2362	55.5919	4.7122	0.417656	396.737	798.81	491.651	112.269
APOE	42.2265	35.2957	466.077	218.112	208.066	53.7176	29.7627	11.1519	964.119	602.508	376.056	121.637
APOF	0	0	0.0395872	0	0	0.0752781	0	0	0	0.0958591	0	0.0528562
APOH	0	0	0	0	0	0	0	0	0	0	0	0
APOL1	1.26371	1.30128	3.7314	3.82537	5.21857	3.21618	38.9535	40.558	0.319504	0.327863	0.667149	5.89241
APOL2	19.9479	20.8638	26.0914	11.1916	15.2342	9.12071	40.2616	41.3256	32.9352	23.5732	30.9707	43.9064
APOL3	0.136023	0.0826772	1.13742	1.55904	2.63034	0.873341	29.1279	32.7178	0.0510202	0.0494223	0.127399	1.45122
APOL4	0.864244	1.01561	1.32281	1.63964	1.13682	1.68311	1.36141	1.57231	0.502484	0.549556	0.738492	1.54542
APOL5	0	0	0	0	0	0	0.0505153	0.0447731	0	0	0	0
APOL6	2.63411	2.65784	7.43201	4.87521	5.64799	4.53457	27.0679	29.1185	0.157776	0.119403	0.328311	1.11003
APOLD1	6.56172	6.79781	8.45293	6.91488	5.97539	5.72697	4.13835	4.30159	9.66028	8.618	2.98127	5.02912
APOM	23.4567	24.9089	13.8942	15.3943	14.5937	14.8834	12.4445	12.1936	9.5512	8.5437	6.25858	3.28622
APOO	18.065	18.306	17.0092	8.09447	10.4124	5.96924	8.72695	8.14628	84.0636	53.6821	33.0834	54.4738
APOOL	2.71059	2.4587	2.28091	2.00756	1.7675	2.01695	1.89109	2.24072	4.73185	4.50792	4.56842	1.91123
APOPT1	15.7059	16.2701	15.2241	12.1351	15.9731	10.4631	17.3524	17.2556	27.984	22.8276	26.6413	26.722
APP	235.303	234.758	424.992	396.426	387.47	360.326	341.254	315.666	232.052	271.668	220.36	96.1906
APPBP2	3.38561	3.10034	7.20765	6.66442	5.58023	8.46804	7.35418	7.79717	10.2598	13.3625	12.8261	5.38818
APPL1	10.9251	11.926	6.24308	5.32978	5.98662	6.04083	8.33352	9.06535	6.38964	4.59356	3.77129	3.22974
APPL2	8.26854	7.51958	10.9376	21.0211	20.0032	18.0738	18.705	21.7033	13.8244	10.5376	10.4387	9.50669
APRT	137.779	133.114	123.366	92.1923	132.357	78.2836	122.04	114.42	130.451	141.637	116.879	126.554
APTX	19.3331	18.0833	12.0227	11.5391	12.3088	10.9407	12.3767	12.5826	18.3212	20.2313	17.0491	16.2494
AQP1	0.163785	0	0.512132	0.721763	6.25458	10.6533	4.45458	5.11617	0.0878547	0.0546877	42.4475	0.387169
AQP10	0	0	0	0	0	0	0	0	0.0308659	0	0	0
AQP11	0.482416	0.950275	1.17635	1.55717	1.42693	1.66335	1.05546	0.623656	0.376995	1.89899	3.2003	1.26859
AQP12A	0	0	0	0	0	0	0	0	0	0	0	0
AQP12B	0	0	0	0	0	0	0	0	0	0	0	0
AQP2	0.0131409	0	0	0	0	0	0	0	0	0	0	0
AQP3	1.09671	0.666617	0.95216	2.82377	4.25257	3.65474	1.15922	0.828587	1.05785	0.483896	1.33877	1.50674
AQP4	0	0	0	0	0	0	0.012666	0	0	0	0	0.00797588
AQP4-AS1	0.0716202	0.266035	0	0.169847	0.0498456	0.255458	0.05698	0.227264	0.201489	0.19518	0.0784603	0.771285
AQP5	0	0	0	0	0.0674471	0.0345665	0.0385504	0	0	0	0	0.0485415
AQP6	0.234525	0.129592	0.311932	0.682575	0.200318	0.707233	0.22899	0.338267	0.0999679	0.290513	0.35035	1.2815
AQP7	0	0.0503008	0	0	0.207341	0.850096	0.0592545	0	0	0.225523	0.271974	0.0746114
AQP7P1	0	0	0.138276	0.478683	1.41092	3.15532	0.062839	0.0185653	0.0658391	0.669664	2.11513	1.71437
AQP7P3	0	0	1.08194	3.03977	10.8724	11.3156	0.573626	0	0.45076	2.32877	5.44134	1.92611
AQP8	0.047314	0	0	0	0.0493938	0	0	0.0500453	0	0	0	0.0355486
AQP9	0	0	0	0	0	0	0	0	0	0	0	0
AQPEP	0	0.0119803	0	0.0420676	0.0123458	0	0	0.0250172	0	0.0214854	0.0259108	0.0355408
AQR	14.2158	14.499	9.5005	10.3272	8.53309	10.6378	10.2786	10.6512	19.7304	16.6505	17.1813	8.47539
AR	0.144939	0.127289	0.305185	0.539364	1.07527	0.278082	6.90978	7.60706	0.248127	0.108254	0.173859	0.529439
ARAF	20.078	19.8818	24.6593	26.7025	25.3554	21.8865	27.391	27.197	33.288	43.7719	47.6242	27.3578
ARAP1	30.6335	32.3387	35.2414	21.3505	22.9177	15.9762	20.2355	19.3039	24.9451	34.7511	30.231	24.8057
ARAP1-AS2	1.32206	1.36781	1.61453	1.10068	1.14526	0.933134	0.604295	0.952077	0.976057	1.40537	1.54076	1.09897
ARAP2	0.40136	0.473133	0.0821282	0.112488	0.182838	0.40605	0.0435432	0.00771871	0.780138	0.457403	1.01529	0.208347
ARAP3	9.30484	9.81339	8.08936	9.86985	10.6842	12.3878	13.8156	12.7804	6.81792	4.02457	8.11182	11.3129
ARC	0.285541	0.308553	0.10712	1.03831	0.476949	0.387023	0.408911	0.463104	3.05259	1.67737	5.48464	2.67456
ARCN1	50.964	48.0504	40.0152	52.1727	50.5444	56.5562	58.16	59.7752	54.3033	56.947	71.4797	36.1846
AREG	0	0	0	0	0	0	0.060286	0.0534332	0.236866	0.0458898	0	0.0379551
AREGB	0	0	0	0	0	0	0	0	0	0	0	0
ARF1	266.016	259.06	251.076	234.265	274.251	225.737	249.764	233.248	164.757	172.644	172.963	120.467
ARF3	91.6661	89.7349	84.9972	71.8794	86.5006	66.996	112.104	107.749	63.2108	70.713	61.8423	41.7187
ARF4	87.8742	83.6469	107.623	107.826	107.89	95.9587	149.428	156.938	61.0069	65.2441	100.886	42.7206
ARF5	90.7663	83.3492	128.777	109.292	160.291	123.129	147.942	160.175	130.367	164.905	150.949	187.648
ARF6	35.2849	33.847	28.2053	29.2358	35.3905	32.938	42.5923	45.3838	49.2204	47.2472	56.1208	46.6223
ARFGAP1	41.818	41.4782	45.9682	50.2769	40.7395	43.196	47.5358	52.0945	17.1228	17.681	21.3869	44.0546
ARFGAP2	47.508	46.4273	49.5963	40.5738	36.5539	30.1091	23.1604	23.1354	17.3653	30.8787	30.6419	30.4524
ARFGAP3	14.4446	14.7137	24.7984	28.5068	26.5915	30.1689	30.2063	32.6164	45.1647	38.5162	47.233	20.5618
ARFGEF1	9.47093	9.93372	9.84674	8.31892	7.74359	8.65364	11.0982	11.6466	16.8212	15.3821	9.87829	4.52215
ARFGEF2	19.9206	20.367	18.037	16.2516	14.7359	13.9101	17.7163	16.6756	18.8256	17.8479	13.6167	3.2824
ARFIP1	8.52852	9.09831	13.0323	11.0588	11.0561	11.2736	10.5003	9.71402	9.87032	12.072	18.0045	5.64746
ARFIP2	17.5568	18.1796	16.6314	12.679	13.7936	10.5805	10.448	11.0556	7.42746	8.84924	9.12463	14.7829
ARFRP1	15.0998	16.6505	20.6516	17.23	19.4755	17.4435	14.6471	12.0556	6.65088	7.02594	9.01125	17.2711
ARG1	0.0823825	0	0	0.0976919	0	0.176321	0.0491608	0.0435709	0	0	0	0.0928459
ARG2	7.43693	7.53401	3.80445	3.03238	3.13009	2.83088	4.87604	5.37889	4.54833	3.55143	4.41502	2.45148
ARGFX	0.236407	0.413669	0.193499	0.267576	0.190708	0.321959	0.243652	0.238688	0.191463	0.185468	0.129493	1.04957
ARGFXP2	0.154999	0	0	0.061263	0.0539374	0.0552857	0.184973	0.163946	0.048451	0.140801	0.169802	0.232912
ARGLU1	25.3577	28.1173	15.3523	22.4607	16.0033	26.1586	19.3415	21.1429	16.6869	17.9434	11.282	21.0055
ARHGAP1	51.5745	52.1008	60.1835	55.0789	51.5036	39.0501	52.4917	53.0861	19.5363	34.4243	39.9261	22.1167
ARHGAP10	5.69604	5.32508	5.27683	4.75607	6.00378	5.03675	5.7484	6.99347	4.22515	5.80652	2.80902	5.06399
ARHGAP11A	25.5295	23.2971	2.51368	7.20669	9.58884	13.8929	9.78086	8.8414	22.1261	20.2903	10.4908	29.2055
ARHGAP11B	2.05597	1.5621	0.361541	0.990378	0.737806	2.47499	1.30345	0.883452	1.98827	1.69255	0.915008	5.50305
ARHGAP12	10.3503	10.4019	8.5808	9.69309	9.26962	11.0354	10.1856	11.5071	9.45708	6.18841	7.12746	3.51546
ARHGAP15	0.0335915	0	0.151221	0.477972	0.666295	1.18618	0.240525	0.0710613	1.92156	4.48565	6.80795	6.13294
ARHGAP17	29.3709	28.5399	28.2909	44.1086	34.5673	31.8131	30.5415	29.4333	16.4085	33.2463	31.4532	24.0791
ARHGAP18	10.9067	10.5352	2.55131	2.29328	4.50151	3.15519	6.33768	6.72395	10.8524	26.555	14.4492	8.43281
ARHGAP19	7.47472	7.55661	1.88784	1.77851	3.70383	4.12722	3.38419	2.86808	3.65975	4.2585	2.69838	1.64127
ARHGAP19-SLIT1	0.0221404	0	0.484515	0	0.00997328	0.0872179	0	0	0.341292	0	0	0
ARHGAP20	0.0435657	0.0706507	0.0882996	0.186062	0.173116	0.244508	0.488892	0.55288	0.361251	0.237571	1.70062	0.111386
ARHGAP21	33.1355	34.3204	44.7048	42.7861	36.8633	41.678	41.2264	34.9372	12.3041	16.0622	12.3685	7.44564
ARHGAP22	1.70819	1.53088	0.317268	2.2512	3.79265	1.45964	13.7841	15.9341	2.28481	0.176723	0.133351	2.25094
ARHGAP23	0.998533	1.18789	7.17573	7.81009	7.9473	10.2731	11.8944	11.7923	1.16834	2.49652	4.58635	4.34308
ARHGAP24	2.78823	2.71491	15.0289	14.2247	13.0404	12.7323	10.9971	11.5925	2.05165	5.2794	21.4214	4.98928
ARHGAP25	0.0195184	0	0.109874	0.115762	0.0815333	0.0208863	0.0465979	0.0413	12.2685	1.094	2.00859	2.08068
ARHGAP26	0.319239	0.298998	0.847824	1.17333	1.1696	1.85023	2.15757	2.19268	5.92768	1.73559	1.61938	1.59445
ARHGAP26-AS1	0	0	0	0	0	0	0	0	0	0	0	0.0507047
ARHGAP27	0.409271	0.383901	0.307072	0.341501	0.379788	0.567702	1.28435	0.978025	2.24595	3.30473	1.62738	2.19805
ARHGAP28	1.19563	1.35023	0.937509	0.999368	0.859405	0.534824	3.81269	4.52992	1.64507	0.899156	0.579755	0.508063
ARHGAP29	0.298889	0.290916	0.33638	0.396101	0.520045	0.489147	2.87448	3.19242	1.99499	0.479137	0.340275	1.01715
ARHGAP30	0.0291157	0.0501476	0.0278547	0.0293474	0.0759903	0.0937813	0.0886089	0.0461952	0.104447	0.119119	0.257582	0.139472
ARHGAP31	17.9357	19.46	44.3052	35.448	25.9604	26.1905	13.8921	10.2643	21.8269	31.5373	25.3021	3.28919
ARHGAP32	3.82261	4.02741	4.84407	5.28951	3.85524	5.48201	1.83107	1.34963	5.60205	7.72084	7.07578	2.59163
ARHGAP33	1.99519	2.83063	1.5516	2.05157	1.73045	3.05654	2.51082	2.77039	1.08782	2.28784	1.40112	3.63394
ARHGAP35	23.7269	24.1828	25.7013	24.9391	28.939	29.2247	51.0175	52.2733	12.6903	22.7501	21.3412	13.5475
ARHGAP36	0	0	0	0	0	0	0	0	0	0	0	0
ARHGAP39	1.87083	1.95949	4.05635	3.07056	2.73649	2.39773	2.42181	2.59371	2.39867	3.95581	4.44638	2.66034
ARHGAP4	0.188512	0.20833	1.67798	0.71122	0.339921	0.311742	0.306772	0.271897	29.7236	23.6868	10.846	30.0843
ARHGAP40	0.0991553	0.10045	0.0892744	0.0705438	0.103514	0.0424406	0.11833	0.146831	0.297551	0.0720583	0.0217251	0.0148997
ARHGAP42	4.07728	4.57264	4.05876	2.46497	2.44599	2.7898	2.37119	2.52685	13.5709	10.7358	9.60023	1.10455
ARHGAP44	0.128953	0.104487	0.0580766	0.045857	0.188424	0.0827915	1.92301	2.75434	0.0241779	0.0117104	0.0423796	0.154969
ARHGAP5	7.44691	6.98639	6.38531	6.49686	6.97305	11.0604	6.36009	5.74896	18.3131	13.8429	18.7874	5.62416
ARHGAP5-AS1	2.81301	2.55493	3.16586	2.01281	2.5316	3.16576	1.15758	1.2312	18.5566	29.5186	25.6097	12.2438
ARHGAP6	1.1625	1.48444	4.14636	4.40629	2.7344	2.67952	0.116578	0.0147607	0.314086	0.0507081	0.122306	0
ARHGAP8	0.000319661	0	0.355058	0	0.0411865	0.168864	2.44294	0.763685	0	0	0	0.0258178
ARHGAP9	0.02777	0.0221643	0.0625072	0.0658558	0.0289905	0.0594302	0.0662797	0.0463073	0.0520831	0.059665	0.0479806	0.271193
ARHGDIA	366.014	357.848	292.958	290.14	342.284	257.522	289.048	248.028	307.026	310.722	359.347	544.416
ARHGDIB	2.27107	1.51638	4.35672	3.67215	6.68163	5.08125	13.6128	10.2638	33.3981	13.5036	32.5698	35.6778
ARHGDIG	1.48634	1.72085	0.318626	1.0071	2.88169	3.02946	0.337861	0.224592	0.398241	0	1.16307	0.478602
ARHGEF1	28.4173	28.1238	38.4662	42.4664	36.4887	39.5971	31.8611	34.4487	23.6549	28.0024	30.0338	33.8257
ARHGEF10	8.54264	8.92919	12.9644	18.9365	16.986	21.2496	10.3913	9.55884	21.0414	25.0862	36.3505	13.0261
ARHGEF10L	3.61357	3.2848	26.5324	30.8715	18.6556	20.2441	9.17194	9.10208	2.84907	4.9949	8.8713	3.83112
ARHGEF11	51.477	53.6234	43.392	37.8234	40.3038	40.506	19.5775	15.071	18.6995	23.7206	30.6381	11.3479
ARHGEF12	16.1904	17.1283	27.1677	42.5632	30.2648	39.5747	26.9139	25.442	16.2371	24.8941	28.5425	11.831
ARHGEF15	0	0	0	0	0	0	0	0	0	0	0	0
ARHGEF16	0.0773852	0.0979942	0.174184	0.619374	2.28223	4.43014	0.623362	0.26602	4.24531	4.27054	5.55283	3.28503
ARHGEF17	5.97248	5.98785	44.7724	51.2335	28.8387	32.6669	22.2589	26.1621	4.68665	6.64146	7.06933	2.89355
ARHGEF18	15.6131	16.429	19.0727	18.2154	16.9002	12.1827	21.2306	21.609	7.79313	10.208	9.92599	7.08952
ARHGEF19	3.16184	3.37169	9.67648	10.6335	9.11105	10.4468	6.64184	6.61049	3.12112	4.16556	4.86149	7.30738
ARHGEF2	61.7509	58.5003	36.1541	35.859	39.3318	34.9095	32.9915	30.073	43.8483	20.0229	34.9959	30.2823
ARHGEF25	8.29092	8.01175	18.1669	14.2608	11.2016	11.8776	14.7595	15.5726	8.59988	9.20342	11.6396	11.5275
ARHGEF26	3.89903	4.29084	6.81315	11.0658	7.10788	13.0904	1.08966	0.089976	3.41593	5.73357	15.9644	3.90736
ARHGEF26-AS1	1.04732	0.685222	0.638457	1.50057	0.501121	1.65768	0.911348	0.969306	0.859373	1.03067	2.17517	4.42623
ARHGEF28	2.2006	2.01575	0.300226	0.571417	1.14203	0.954622	4.25662	4.2006	1.63819	1.62072	1.07896	1.68414
ARHGEF3	8.92616	10.3102	29.7446	21.8366	18.8536	18.2076	21.8421	21.2782	2.28899	3.8372	4.74122	0.742715
ARHGEF3-AS1	0	0	0	0	0	0	0	0	0	0	0	0
ARHGEF33	0.0127403	0.0774394	0	0.0302134	0.0133003	0.0272655	0	0.0134757	0.0119474	0	0.0279141	0.0191444
ARHGEF35	0.046022	0.0466227	0	0.136426	0.312293	0.295476	0.439374	0.0243393	0.474737	0.752517	0.453757	0.432223
ARHGEF37	0.112069	0.0113531	0.92072	1.43515	0.725368	0.93537	0.575083	0.320052	0.0735659	0.580279	1.38732	0.261022
ARHGEF38	0	0	0	0	0	0	0	0	0	0	0	0.0149452
ARHGEF38-IT1	0	0	0	0	0	0	0	0	0	0	0	0
ARHGEF39	5.07821	5.1891	2.13082	2.34941	2.9112	2.73268	4.01096	3.94895	10.1396	8.15951	5.98126	9.4724
ARHGEF4	2.07234	2.08066	1.10515	0.661806	0.409378	0.161601	0.0720226	0.0478766	0.0848941	0.0137053	0.0330574	0.158706
ARHGEF40	8.91795	9.54802	22.0425	19.2862	19.2842	21.596	20.1342	21.4104	18.3389	23.0299	19.4195	7.29046
ARHGEF5	0.00988553	0.0400583	0.0556277	0.0234434	0.154801	0.126937	0.129769	0.0731933	0.333732	0.341242	0.249082	0.237674
ARHGEF6	4.22581	3.99905	10.9965	14.5311	12.4385	18.0984	4.6125	3.45588	25.2751	45.9431	50.6524	8.7351
ARHGEF7	15.194	15.8095	15.2969	17.0742	15.1897	18.3066	17.5996	17.3734	24.4262	47.5053	48.0113	8.20412
ARHGEF9	5.99751	6.1964	8.02574	11.5807	8.59909	9.58938	5.22027	4.73882	3.44924	9.40806	16.0314	4.12466
ARID1A	20.8916	20.276	23.7974	22.5936	20.8479	22.7693	22.254	21.7864	17.8553	23.513	22.5864	13.1147
ARID1B	11.4423	11.6761	21.123	14.5169	12.7462	13.1497	11.0806	9.55637	10.4503	16.1179	15.8852	4.87493
ARID2	5.77862	5.93731	4.92385	5.68249	5.45181	7.11027	5.26638	5.18935	7.03166	7.48917	7.85427	3.22063
ARID3A	5.16566	5.29371	4.3995	3.59469	3.56045	2.43297	4.78411	4.83098	6.5088	5.52592	2.2505	4.4206
ARID3B	2.40667	2.18903	1.87851	1.90247	1.21571	1.66146	1.00368	0.930649	3.91924	3.25583	1.28991	1.04993
ARID3C	0.0504682	0	0.0567988	0	0	0.0540037	0	0.0533816	0.0473275	0.0458455	0.165865	0
ARID4A	1.41658	1.60614	4.96229	4.64977	3.32986	4.53202	3.74619	3.80616	4.50432	4.49962	4.96393	8.56979
ARID4B	5.28277	4.66461	7.90212	9.41371	7.35502	9.7334	7.95546	8.5789	4.35932	4.20973	4.90312	5.53149
ARID5A	5.27046	5.25996	5.96093	3.86722	5.66557	4.99753	3.42506	4.13963	7.65837	7.79778	5.8024	4.62638
ARID5B	3.72741	3.96527	10.0324	9.45957	6.77021	5.78913	21.3786	22.2948	5.00754	6.76436	7.12479	8.63215
ARIH1	17.9051	18.2331	18.4155	18.396	16.65	17.5646	19.5643	19.3984	23.6041	21.1445	18.5266	10.2178
ARIH2	38.6927	38.8962	31.2893	28.6668	26.6654	25.7105	26.4619	26.2157	20.7305	15.7554	15.6806	21.3357
ARIH2OS	0.224827	0.455523	0.927771	0.933056	0.547656	0.761826	0.760195	1.18903	0.983898	0.748856	0.985197	2.33673
ARL1	13.7278	13.0268	12.8292	12.1567	13.2791	12.6999	14.0599	15.0349	17.4036	18.3898	21.6065	14.6095
ARL10	2.04099	1.87529	1.92307	1.60401	0.84237	0.761847	0.283217	0.376535	0.511875	0.237144	0.285989	0
ARL11	0.0587571	0.0595241	0.0661274	0.174177	0.06134	0.204338	0.0525897	0.0776862	0.0826508	0.0934065	0.112645	0.529754
ARL13A	0	0	0	0.09293	0	0.0603576	0.0935284	0	0	0	0.0429284	0
ARL13B	3.9984	4.14376	2.42423	3.14354	3.9929	4.6929	3.54278	3.41265	7.09033	5.46931	6.29684	7.43276
ARL14	0	0	0	0	0	0	0.114905	0.0509216	0	0	0	1.22982
ARL14EP	14.9433	16.5238	17.2307	18.7473	15.043	13.1704	8.1204	9.06724	8.32042	6.48426	8.25832	8.24512
ARL14EPL	0	0	0	0	0.124497	0	0	0.378418	0	0	0	0
ARL15	1.53363	1.76235	2.00938	2.25276	2.46131	2.89023	3.16871	2.39692	3.52034	2.55758	2.80853	1.51343
ARL16	9.21787	9.23268	16.7627	11.7328	11.689	9.08344	9.26024	9.97032	34.1862	41.6784	35.8288	67.3005
ARL17A	3.17414	3.4747	3.80218	4.84715	3.25961	4.55403	3.91109	4.04967	3.55173	4.86625	4.55902	9.50713
ARL17B	0.183919	0	0.206989	0.218081	0	0.590408	0.877939	0.778142	0.689892	0.167072	0.805936	1.52003
ARL2	135.899	143.939	215.757	139.549	161.194	112.563	69.5321	66.6412	99.1668	127.735	137.216	151.108
ARL2-SNX15	0	0	0	0	0	0	0.287991	0	0	0	0	0
ARL2BP	31.3244	31.2309	30.1997	34.9867	41.6461	43.0703	49.8755	55.5125	31.5452	38.7661	59.4873	20.1611
ARL3	0.156563	0.158607	0.28833	0.759452	0.386325	0.731043	0.730371	0.843058	3.1633	2.81858	3.6642	5.48588
ARL4A	5.2991	4.86292	6.30114	5.63794	6.28829	5.51877	8.43446	8.58107	6.12589	7.25965	5.32854	7.13271
ARL4C	5.95796	5.09004	25.817	92.5563	53.7573	44.9799	30.3081	29.3459	2.33014	2.56894	22.0173	18.0191
ARL4D	10.099	10.0775	21.0714	17.6258	18.8746	11.9397	18.1456	17.9233	2.30555	1.51181	2.81767	5.96785
ARL5A	9.12397	10.0837	5.69351	5.12949	5.42553	6.61116	4.46657	4.73309	11.0893	8.2233	10.6941	7.52237
ARL5B	4.01215	4.26774	2.15351	1.86636	2.73864	3.64923	2.57816	2.39935	4.06635	1.86438	2.65411	0.62608
ARL5C	0	0	0	0	0	0	0	0	0	0	0	0
ARL6	2.63479	2.05337	1.43132	1.34644	2.41832	2.11374	2.16819	2.12229	3.10941	1.83421	2.21213	1.1955
ARL6IP1	129.37	113.72	55.1629	54.0899	79.8907	79.6085	68.2369	57.6105	124.886	155.987	100.475	81.9019
ARL6IP4	64.9449	58.736	96.5882	81.0137	88.5146	65.1619	64.133	61.0534	62.6293	86.4977	72.4207	175.271
ARL6IP5	45.9635	46.3709	89.0973	74.5244	81.9099	59.1478	73.3519	77.3618	54.0761	65.7991	82.2368	43.4886
ARL6IP6	4.75738	3.37037	1.72641	1.98427	3.93073	3.60264	4.04163	3.74863	17.5427	11.2021	6.43822	6.7241
ARL8A	17.1052	16.5019	36.5387	30.2484	31.9783	28.2808	24.762	18.9955	21.9212	26.6336	49.7784	32.4293
ARL8B	28.3809	25.7068	24.7959	22.383	22.236	22.8722	20.9581	22.8074	15.694	16.1922	18.1898	8.63664
ARL9	0.90914	0.502367	0.186033	0	0	0.353755	1.08495	0.874201	0.0775056	0	0.0905426	0.124194
ARMC1	13.068	13.3318	7.29144	7.9877	8.99245	9.03998	9.90615	9.3252	14.7402	11.0517	10.6261	6.55481
ARMC10	15.4968	15.0847	7.48666	7.52751	9.81829	10.2697	16.8553	18.0271	43.2378	26.0937	25.7774	23.4263
ARMC12	0.0541291	0	0.182757	0.0641833	0.169525	0.173763	0.129193	0.515284	0.253802	0.147513	0.0592988	1.46408
ARMC2	0.390664	0.494705	0.219834	0.212313	0.288884	0.209016	0.621615	0.654258	0.442676	0.369667	0.23182	0.452508
ARMC3	0	0	0	0	0.0209413	0	0	0	0.0188112	0	0	0.0150714
ARMC4	0.0155092	0	0	0	0	0	0.0185084	0	0	0	0	0
ARMC5	5.54439	6.07586	5.7159	5.70691	4.84962	3.81609	6.36477	6.07621	4.7423	7.62402	6.73666	7.64309
ARMC6	50.5514	48.4629	20.5926	17.1632	25.1562	15.1923	15.0926	14.7681	18.4124	19.8957	13.1638	23.2854
ARMC7	7.03894	7.15835	9.48179	10.2155	9.05068	7.99734	10.411	9.515	9.88863	13.6525	16.8813	11.3123
ARMC8	8.10274	7.59136	6.43524	7.22491	7.92241	9.04458	7.83658	8.12936	8.5542	8.15906	9.10176	5.41297
ARMC9	15.4623	14.4566	115.331	80.3027	57.4957	46.4627	35.6499	34.5893	6.85267	25.6764	18.4596	13.7258
ARMCX1	4.71921	4.34371	19.5148	9.8166	10.3319	8.51253	6.14672	5.33392	9.71086	14.8941	30.8423	5.47051
ARMCX2	0.256927	0.122483	0.778491	1.20155	2.59246	3.23065	9.67177	8.31044	41.1372	22.9094	27.3022	10.0852
ARMCX3	6.19523	5.47793	18.8847	19.2017	16.1774	20.7943	12.3497	10.6626	22.0351	30.5518	44.8412	12.5031
ARMCX3-AS1	0.206458	0.209153	0.697067	0.489614	0.323301	0.662764	0.369575	0.545941	0.871244	1.12528	1.13088	0.155119
ARMCX4	0.582715	0.563124	1.49451	1.87299	1.1039	1.56733	0.926758	1.00371	0.447776	0.539139	0.690667	0.746538
ARMCX5	4.15523	5.49445	5.09228	3.51514	3.29223	3.12168	2.99893	3.21898	11.1884	9.28928	9.95637	2.72513
ARMCX5-GPRASP2	0.794026	1.03359	1.64178	1.63468	1.37638	1.41834	1.47496	1.25558	2.55591	3.2633	4.85655	1.82715
ARMCX6	21.9229	21.8976	38.2193	25.1352	26.2731	19.3407	23.1568	23.1985	45.6389	53.9946	69.802	37.6283
ARMS2	0	0	0.0973282	0	0	0	0	0	0	0	0	0.0649756
ARNT	10.9129	11.3989	18.8447	18.3069	16.2505	17.3884	14.8652	15.3495	12.8719	15.2519	15.6787	5.44068
ARNT2	10.4059	10.6583	20.749	24.2682	21.9069	27.7141	4.62986	2.64298	37.8001	71.4334	59.7452	9.47956
ARNTL	2.18257	2.96671	10.36	15.1884	11.3516	11.7268	3.44648	3.03534	4.1738	4.82183	15.5099	2.88063
ARNTL2	0.186901	0.106025	0.0673043	0.341998	0.825668	1.30999	1.59187	1.93614	0.458273	0.354606	0.271532	1.45164
ARPC1A	220.072	215.023	210.637	139.106	180.578	139.715	210.6	193.592	244.781	308.005	209.561	251.95
ARPC1B	241.823	230.523	455.544	302.007	438.798	372.074	417.841	368.416	466.821	653.559	506.218	463.956
ARPC2	228.848	214.163	205.288	173.357	222.281	173.223	278.004	265.65	143.389	129.028	124.932	200.144
ARPC3	179.594	179.526	210.68	171.054	193.262	152.31	199.748	211.005	177.061	183.798	164.011	200.267
ARPC4	156.994	146.045	148.104	111.686	146.539	93.8895	142.278	149.383	65.1672	82.1701	69.655	89.2196
ARPC4-TTLL3	0.417759	0.247493	2.08919	0.809678	0.682601	2.01755	1.92174	2.43051	0.311858	0	0.0427344	2.34237
ARPC5	60.7924	56.1093	68.2344	61.3066	79.1617	74.8438	68.2269	73.0082	88.2396	101.562	93.4582	44.6937
ARPC5L	45.0451	39.7678	20.3354	15.6916	23.1805	17.4285	24.4483	24.361	36.3948	37.4513	36.3134	77.1525
ARPP19	41.51	41.8704	31.1367	27.8956	28.7285	30.4837	26.73	26.5332	27.5648	29.9557	36.9451	15.7364
ARPP21	0	0.0178388	0	0	0	0	0.0395645	0	0.49594	0.128094	0.0192922	0
ARR3	0	0	0.0532007	0.0560516	0	0	0.0564125	0.1	0.0443294	0	0.0517859	0.0355164
ARRB1	26.444	24.1513	19.9582	13.461	13.5962	7.8378	16.5754	17.0592	6.35978	4.52516	9.48617	4.69322
ARRB2	12.5756	12.532	4.26841	8.16631	11.5149	11.35	11.0532	10.6464	20.7739	15.1177	12.8042	22.6939
ARRDC1	4.08436	4.82095	8.09691	7.15343	7.04129	6.65596	8.54101	7.2927	11.8419	11.4711	10.0572	11.7681
ARRDC2	4.8883	4.65416	7.30066	6.25904	7.3928	6.0353	12.1378	12.7046	5.26654	4.72895	5.80413	9.94053
ARRDC3	2.54773	2.46063	5.89804	4.7271	6.95938	4.91565	18.7623	22.2426	3.11955	3.03386	4.17935	1.76542
ARRDC3-AS1	0.795572	0.990175	1.10002	1.32068	0.593245	1.38641	0.813788	1.3464	0.91659	1.01178	1.5688	3.03993
ARRDC4	2.7179	2.24654	4.83934	4.58559	4.95482	3.97902	2.08164	1.50176	5.52865	4.28688	14.8281	3.2815
ARRDC5	0	0	0	0	0	0	0	0	0	0	0	0
ARSA	5.83103	5.57932	36.9895	25.2227	20.498	16.4095	11.8038	13.1192	15.4409	24.9763	49.5039	23.2151
ARSB	14.2755	14.3032	17.2349	23.6174	24.6116	29.8119	16.3124	13.9745	8.75318	14.1028	20.595	6.12056
ARSD	0.398662	0.308213	5.02981	3.45825	3.31853	3.54742	3.70588	3.62862	8.31328	14.3428	24.6066	5.18656
ARSE	0.207282	0.0524968	0.991449	1.13675	2.29918	3.74291	2.81378	2.24728	8.5771	12.0509	18.4217	6.65778
ARSF	0.0266098	0.0269571	0.0299476	0	0.0277794	0	0.0317555	0.0562917	0.0499075	0	0.0291512	0.119957
ARSG	4.27802	3.5583	3.46096	6.9825	4.90064	2.15181	7.67974	8.72304	0.838555	0.673613	0.654461	0.688236
ARSH	0	0	0	0	0	0	0	0	0	0	0	0
ARSI	0.0705164	0.0714369	1.19043	0.334458	0.496909	0.282961	0.0841529	0	0.08266	0.336301	0.13519	0.0529813
ARSJ	3.84116	3.90313	6.96408	15.6574	9.97018	11.6311	4.96016	4.74211	4.04006	3.54235	1.07439	1.62282
ARSK	2.82711	2.61131	1.66573	2.52404	3.26389	4.02168	4.40581	4.0809	2.21451	1.51068	2.29551	1.86171
ART1	0	0	0	0.0558998	0	0	0	0	0	0	0	0.0354202
ART3	1.01881	0.793947	0.130622	0.185856	0.122694	0.0838315	0	0	4.05936	2.69606	3.97358	1.11459
ART4	0	0	0	0	0	0.0957907	0.0534155	0	0.0839486	0.325279	2.64787	1.27792
ART5	0	0	0.0562533	0.177808	0	0.213946	0	0	0.0468729	0.0454048	0.109517	0.300669
ARTN	0.0656591	0.0665161	0.102753	0.0778556	0.0342709	0.10539	0.0391767	0.27781	0.0615726	0.0298203	0.33345	0.813922
ARV1	10.9857	10.2763	12.4111	10.2313	10.6777	10.8545	7.18294	6.90069	10.8941	10.6294	10.3749	6.29322
ARVCF	0.51799	0.883821	2.6847	1.64865	1.39459	1.77952	0.829633	0.951675	2.12197	3.47954	7.40685	3.46167
ARVP6125	0	0	0	0.0473164	0	0.0426997	0.047621	0.0422079	0	0	0	0
ARX	0.449628	0.554518	0.814044	0.394063	0.326534	0.188267	0.303283	0.310163	0.0366649	0.0355168	0	0.0293757
AS3MT	0.187169	0.222145	0	0	0.243657	0.253426	0	0	0.000383878	0	0	0.373672
ASAH1	46.5905	45.8087	84.0349	72.8063	79.2979	63.5005	36.3829	26.7971	412.726	299.292	621.836	113.505
ASAH2	0.321975	0.250905	0.055744	0.0293633	0.129277	0.0264979	0.147781	0.15718	0.0696741	0.0224943	0.0271283	0
ASAH2B	0.610207	0	0	0	0	0	0.145642	0.516345	0	0.110863	0	0
ASAP1	34.4325	34.4048	28.3884	39.8347	31.4972	31.858	29.1547	27.9648	32.5236	40.5406	31.9553	13.6953
ASAP1-IT1	0	0.271366	0.0602941	0.190575	0	0.0573269	0	0	0.0502399	0	0	1.81133
ASAP2	12.0454	11.5246	34.2634	55.7612	43.7536	59.3658	28.2276	24.9391	10.9692	14.5139	30.1523	7.44058
ASAP3	4.03242	3.81541	5.61662	5.71246	6.47428	5.52535	16.5171	18.9189	7.91238	4.37633	3.48446	4.27161
ASB1	4.32601	4.10308	3.71578	4.73712	3.98969	4.90731	3.89309	3.80061	5.92631	5.49021	5.87001	5.81379
ASB10	0	0	0	0	0	0	0	0	0	0	0	0
ASB11	0.266913	0.286419	1.24784	1.36296	0.379567	0.648426	0.269524	0.130296	0.154027	0.694843	0.264619	0.755904
ASB12	0	0	0	0	0	0	0	0	0	0	0	0
ASB13	23.8187	24.7477	14.3126	8.8	12.288	6.41153	10.0142	9.22151	3.50373	2.86049	3.63088	3.07789
ASB14	1.0992	0.822265	0.294672	0.279416	0.546252	0.756462	0.781154	0.940727	0.613837	0.331975	0.516304	0.746878
ASB15	0	0	0	0	0	0	0	0	0	0	0	0
ASB16	0.323938	0.19143	0.459512	0.576161	0.39454	0.49106	0.386581	0.314084	0.227834	0.465921	0.207011	0.714916
ASB16-AS1	2.90011	3.82446	5.22099	3.03901	3.75314	2.98776	3.36061	3.68056	1.77268	4.15303	4.36682	10.4071
ASB17	0	0	0	0	0	0	0	0	0	0	0	0
ASB18	0	0	0	0	0	0	0	0	0.0409223	0	0	0.19672
ASB2	3.06073	3.10068	1.6653	1.61032	2.32768	1.90869	2.298	1.00767	3.46079	2.79878	1.37675	0.228439
ASB3	1.53592	1.01273	0.99542	0.803737	0.644525	2.04417	2.76114	1.5286	5.10993	1.44605	2.14184	5.03668
ASB4	0.115437	0.146179	0.0162396	0.0342196	0.0406809	0.0617617	0.0860999	0.0411393	0.592664	0.0131079	0.0632308	0.188542
ASB5	0	0	0	0	0	0	0	0	0	0	0	0.0138825
ASB6	10.8538	10.2888	8.98178	9.15496	9.51948	8.84341	11.0619	11.6556	10.5791	9.63408	10.906	15.2162
ASB7	5.92655	6.74136	8.72461	7.74811	7.0558	6.5954	7.01284	6.51893	7.10774	8.44869	8.59801	2.92634
ASB8	10.1695	11.0491	20.6451	15.6065	15.0079	13.5501	12.3948	12.7518	7.7472	13.4925	14.0625	9.56303
ASB9	8.11765	8.00313	6.47782	7.16407	5.72655	6.38219	3.77998	3.98157	7.38064	5.39966	4.75742	4.05661
ASB9P1	0.0367592	0	0.12411	0.087174	0.038375	0.0786685	0	0.0388812	0.0344716	0.0333921	0.0402699	0
ASCC1	10.8241	10.1186	10.6966	10.4302	12.3683	11.5131	15.9484	16.5387	8.53505	6.97501	7.14556	6.32405
ASCC2	43.4386	42.108	31.1168	27.7915	30.6714	25.2145	42.0422	38.3314	42.454	45.9537	47.9233	46.5207
ASCC3	11.3983	11.7072	5.00864	5.68829	5.9928	7.1296	10.3148	10.8998	11.1369	8.03845	7.175	3.87228
ASCL1	0	0	0	0	0.0478343	0	0	0	0	0	0	0
ASCL2	0	0	0	0	0	0	0	0	0	0	0	0.0238576
ASCL3	0	0	0	0	0	0	0	0	0	0	0	0
ASCL4	0	0	0	0	0.0265229	0	0	0	0	0	0	0
ASCL5	0	0.0435169	0.0483445	0	0.0448444	0.137896	0.0512631	0	0.0402829	0	0	0.0645488
ASF1A	8.09019	8.08101	8.05932	6.8252	6.7188	5.74704	5.59809	5.36923	10.0306	7.78145	8.21738	8.03646
ASF1B	33.2155	32.9213	7.1222	13.223	29.6403	29.6491	18.1252	12.4467	33.5543	33.4979	23.7214	19.3273
ASGR1	0.0441503	0	0.452209	0.104708	0.046091	0.0472435	0.0526882	0.0466993	0.301441	0.0401058	0.193482	1.12832
ASGR2	0	0	0	0	0	0	0	0	0.0490795	0	0	0
ASH1L	9.46284	9.97512	11.4882	13.9079	10.68	13.8697	12.6442	11.7378	6.82904	9.79361	11.3409	2.50208
ASH1L-AS1	1.21684	1.02225	1.16906	1.30209	0.867539	0.825708	1.27506	1.34986	1.08544	1.45586	1.75573	1.8062
ASH2L	29.3293	26.1658	37.9216	28.2204	29.0769	23.7085	15.2824	14.7371	25.2844	32.9164	25.9377	20.9545
ASIC1	6.20467	6.30427	13.6328	12.1674	7.6831	7.52682	3.87468	2.75786	6.35151	5.20326	3.5569	4.95433
ASIC2	0	0	0	0	0	0	0	0	0.492811	0.0439514	0	0
ASIC3	0.322767	0.381477	0.365664	0.800147	0.8349	1.64772	1.50841	1.65153	0.679199	0.928479	1.4511	5.57282
ASIC4	0.019786	0	0	0.0469223	0.123934	0.677506	0.0708366	0	0.575194	0.125816	0.130054	0.386513
ASIC5	0	0	0	0	0	0	0	0	0	0.0318886	0	0
ASIP	0.274913	0.278502	0.309397	0.162988	0	0	0.164038	0.145391	0.128902	0.124866	0.150585	0.516378
ASL	23.8789	23.9478	19.7959	13.5516	22.7403	15.2794	23.3548	24.8914	23.5599	26.7487	24.6935	36.3099
ASMT	0	0	0	0	0	0	0	0	0	0	0	0
ASMTL	0	0	0	0	0	0	0	0	0	0	0	0
ASMTL-AS1	0	0.0333859	0.0370896	0	0	0	0	0	0	0	0	0
ASNA1	114.13	107.062	108.504	84.9619	123.505	78.5942	99.4708	107.984	67.6033	92.6511	80.836	88.7039
ASNS	27.6476	23.1281	8.27401	13.7028	19.7293	19.9069	36.922	29.8074	87.8791	43.7885	49.0942	73.2402
ASNSD1	12.3502	12.1846	7.59799	8.71549	8.15441	9.7143	10.9989	11.9421	20.3975	17.7285	18.7549	14.5939
ASPA	0.592016	0.784283	20.6518	8.90835	6.46572	10.6232	1.68474	0.240838	0.170817	2.15118	4.58984	1.77922
ASPDH	0	0	0.069984	0.288524	0	0.086791	0.0967917	0.229271	0.0760614	0	0.177711	0.12188
ASPG	0	0	0	0	0	0	0	0	0	0	0	0
ASPH	38.5513	39.4986	32.5052	37.8556	44.0264	44.1741	45.3362	45.126	62.9544	54.1705	60.1677	37.9624
ASPHD1	5.08407	6.23037	9.644	10.3553	12.1132	13.4689	9.29656	10.4515	13.957	12.6633	34.8102	28.7412
ASPHD2	1.20969	1.46377	1.92869	2.11173	2.45557	2.42706	4.27071	4.14067	3.0566	3.22034	2.87132	2.67615
ASPM	9.33279	7.33569	0.93777	2.9667	3.66959	7.3243	4.34189	3.82043	11.1787	9.04239	4.9992	4.99896
ASPN	0	0	0	0.0296493	0.026127	0	0	0	0	0	0	0.0676235
ASPRV1	0.158849	0.160923	1.04285	1.44405	0.967353	0.878215	0.442324	0.980111	0.173791	0.673396	1.33416	0.835441
ASPSCR1	19.975	18.3831	17.7193	17.1324	21.603	15.4931	18.0866	18.1173	17.4172	26.2176	21.5189	36.7749
ASRGL1	2.01061	2.22619	4.98057	3.21902	3.90638	4.31355	1.19541	0.841636	5.4896	17.1417	10.7225	6.75519
ASS1	0.396211	0.167238	0.0743116	0.939621	2.61968	0.0706544	12.0574	14.0389	1.05275	0.449907	0.904284	0.644992
ASTE1	4.25021	4.45638	3.89843	3.62855	4.17082	3.8885	4.26057	3.73132	3.82627	3.84162	4.91221	3.56055
ASTL	0	0.0969166	0.0538341	0	0.0499366	0	0	0	0	0	0.0524024	0
ASTN1	0.0141904	0	0	0.0174666	0.0740145	0.0455827	0.0350697	0	0	0.0128906	0	0.0426471
ASTN2	6.20982	6.25017	15.918	16.052	10.6357	13.998	9.92137	8.24755	14.915	13.122	38.7518	21.7298
ASUN	34.2769	33.9416	15.9268	13.0489	16.1312	13.6913	19.2496	19.8917	26.2416	21.3116	17.6502	14.0589
ASXL1	28.9319	28.7006	30.904	33.9196	28.3765	32.8486	30.2016	29.2838	19.7127	25.2336	17.1678	15.2267
ASXL2	14.0368	15.2374	12.6853	12.3609	12.7214	12.9191	15.3382	14.3081	17.4503	14.9023	12.8241	2.99554
ASXL3	0	0	0	0	0	0	0	0	0	0	0	0.00527642
ASZ1	0.0192465	0	0.0433215	0.0456429	0.0200925	0	0	0.0203575	0.0180487	0.0349672	0.0421694	0.115684
ATAD1	0.258407	0.280478	0.332366	0.196974	0.134883	0.355511	0.0881078	0.214754	18.1398	11.2003	11.8492	5.96316
ATAD2	34.7455	35.8702	5.48287	7.78697	13.5896	16.3481	9.7208	7.35849	29.9791	21.4815	11.5707	9.17277
ATAD2B	1.65725	1.6783	1.72548	2.02165	1.38333	2.2801	1.2077	1.51305	1.77341	1.70537	2.14406	0.71984
ATAD3A	42.5649	41.1256	16.5476	17.6649	23.3028	19.439	17.868	14.9062	26.6235	26.6325	22.7598	43.4068
ATAD3B	14.9979	17.1641	3.87695	6.36324	5.77359	6.36928	5.53726	5.94889	8.39479	5.34322	3.36308	24.4032
ATAD3C	0.228663	0.217169	0.562943	0.559217	0.223794	0.504655	0.255826	0.483725	0.214432	0.272629	0.266158	1.54622
ATAD5	1.64289	1.75193	0.175165	0.307586	0.478424	0.804968	0.454031	0.439004	4.9625	1.8223	1.07988	2.2933
ATAT1	10.0416	10.894	13.9455	13.9144	10.3508	11.5959	6.34421	6.02351	4.79858	7.50019	7.40207	7.21608
ATCAY	0.237826	0.295687	0.206826	0.512728	0.214423	0.520539	0.361221	0.377332	0.2433	0.245501	0.236854	1.29141
ATE1	8.41491	7.07316	9.88093	10.812	9.76392	10.231	9.48255	8.98334	12.1422	14.6966	11.5874	3.34715
ATF1	10.17	9.65887	7.23023	6.99857	9.24256	7.91895	10.1049	9.74864	9.92032	8.35176	8.13219	4.91213
ATF2	8.82889	9.39279	9.51089	10.8411	8.78647	10.2661	10.8251	9.84307	13.444	14.8792	17.2491	4.76841
ATF3	2.80712	3.38481	10.0418	24.3407	21.4176	22.3384	5.58837	5.5181	2.98119	4.10583	41.4116	5.91892
ATF4	294.655	283.583	342.973	267.205	299.119	232.407	403.112	421.024	435.581	268.682	335.837	488.257
ATF5	12.6706	11.4973	6.84246	10.1891	12.6548	10.4608	18.4538	18.4712	2.53755	7.58404	9.90689	15.4807
ATF6	9.77542	10.2129	10.6493	13.4471	12.7675	15.1346	11.5215	10.6257	11.2086	12.9064	13.9514	4.20149
ATF6B	55.5551	52.5813	103.491	103.159	86.6979	79.5539	52.1691	50.6269	20.8469	47.9873	36.4885	33.6971
ATF7	18.5128	19.5162	16.7252	16.2626	15.593	16.7033	15.1403	16.0312	8.90102	14.2029	10.5191	7.41599
ATF7IP	14.7318	15.1972	18.2944	17.1068	14.7798	16.5789	21.4688	19.9333	11.3861	16.0865	18.4755	5.76758
ATF7IP2	0.501541	0.507976	1.14397	1.51535	1.09772	1.89053	0.979423	1.05797	0.363405	0.191035	0.389783	0.510383
ATG10	3.18692	2.65289	4.0325	3.13739	2.76731	2.62609	3.81264	3.88184	3.87706	5.13771	3.45096	4.06587
ATG12	7.37959	7.68385	6.9187	7.98594	9.14477	9.39627	10.2689	10.1852	8.12972	7.81444	9.05567	9.58502
ATG13	18.6639	18.3966	35.7075	29.0028	25.9249	21.7296	22.1392	20.5887	14.9036	25.364	27.2977	15.6757
ATG14	3.48695	3.70733	9.54533	8.50123	5.04585	6.37878	4.35352	4.73506	7.59749	12.1057	14.2965	9.14788
ATG16L1	14.0275	13.4564	9.46075	10.335	11.659	9.93494	15.2936	14.9372	8.43703	8.18934	7.64511	10.3426
ATG16L2	1.6685	1.85386	4.57334	4.18021	2.50039	4.11791	1.4452	1.67943	1.38801	1.46678	1.79838	12.0305
ATG2A	9.66973	8.89527	41.0244	24.0461	14.0903	11.8602	8.6598	8.35609	6.37616	10.6223	10.8437	6.78805
ATG2B	2.63693	3.05991	4.21953	4.82085	3.54867	5.2175	3.2098	3.30134	1.51517	3.45808	3.70288	0.936574
ATG3	93.7003	97.5743	45.6475	46.6019	55.9492	44.8012	48.6435	44.019	84.3297	64.0896	65.4926	48.3953
ATG4A	3.73815	3.28536	4.01201	3.63999	4.36766	3.92054	4.13618	4.60856	4.94486	5.05987	7.18687	5.1336
ATG4B	15.7656	15.69	14.2993	13.7286	14.4508	13.8728	13.9521	13.0063	13.8541	17.5747	17.8905	27.2511
ATG4C	3.23614	2.77209	2.86938	3.17808	3.14052	4.77027	2.63191	2.40704	5.7598	3.7784	4.34236	2.94092
ATG4D	20.0357	21.7359	21.7498	13.8737	18.2092	12.1897	15.8787	12.8656	26.3449	18.4529	13.731	15.1231
ATG5	7.47443	7.50236	6.09144	6.35674	7.92855	6.78454	12.3032	12.9766	10.5381	8.28822	9.88241	10.5344
ATG7	3.20074	3.26432	4.29353	4.52353	4.62369	3.87467	6.07398	5.63106	3.73927	3.25406	3.53068	3.82169
ATG9A	45.0791	45.6396	43.2997	49.2775	45.3491	37.4434	41.6574	39.2553	27.6859	40.0971	37.6618	31.5949
ATG9B	0.129452	0.0951578	0.0161719	0.0851953	0.037419	0.0307528	0.0342971	0.0303985	4.86474	4.02056	3.41612	6.13439
ATHL1	7.07492	6.99456	8.21179	10.1881	5.16124	9.74137	6.32721	6.9604	2.87767	2.49332	2.4279	23.2863
ATIC	101.247	96.9671	47.9678	38.9414	51.1083	36.9258	51.0626	47.4917	95.2847	59.3886	55.7627	95.2337
ATL1	1.26927	1.48199	4.91048	5.91489	4.28631	5.78135	3.02952	2.63959	3.28497	15.0305	11.0878	1.72953
ATL2	17.8187	17.6935	7.92073	8.34676	10.3445	10.7876	11.1363	11.5586	38.247	20.8392	15.453	12.2467
ATL3	51.7768	51.2921	30.9119	39.722	42.8117	37.1266	32.1098	32.4986	19.694	16.0943	18.6005	11.1694
ATM	3.85014	4.05167	3.12491	2.89518	2.41416	3.06182	2.90419	3.15461	11.0928	5.24255	7.23756	3.05951
ATMIN	10.14	10.4767	13.2404	11.2131	11.8373	12.8766	17.0883	16.8406	13.4702	21.8118	20.7563	11.1205
ATN1	106.174	105.885	108.856	115.766	113.528	104.485	145.391	141.009	44.3817	52.4706	55.7587	37.1415
ATOH1	0	0	0	0	0	0	0	0	0	0	0	0
ATOH7	0.0397223	0.0402408	0.0447049	0	0.0414683	0.0850098	0	0	0.0372502	0.0360838	0.043516	0
ATOH8	5.80596	5.74148	12.1647	24.2431	21.1611	20.4851	7.90909	8.06448	1.2984	2.46518	2.42689	2.18457
ATOX1	918.566	832.71	279.898	160.813	287.186	135.317	197.718	168.264	414.201	242.903	187.927	563.19
ATP10A	6.48916	6.25832	7.68874	2.10521	2.83983	0.977679	2.77546	1.32882	0.311569	0.301812	0.0227485	0.647469
ATP10B	3.38443	3.68018	0.894348	0.252395	0.777749	1.04774	0.431833	0.0300193	7.49205	11.0795	8.41026	2.42022
ATP10D	1.54747	1.66773	2.10286	2.3229	1.89046	1.75276	4.38103	5.33699	3.47353	4.75552	6.28508	1.00805
ATP11A	31.5909	35.4364	10.8433	9.35571	9.16252	7.46444	6.71464	4.40132	25.4062	11.1525	9.08881	1.59018
ATP11B	9.11437	8.83933	8.32505	7.58775	8.00579	11.5432	8.80136	9.77247	16.1102	13.5192	11.2309	4.51566
ATP11C	3.25363	3.08794	2.17623	1.85374	1.49376	2.51481	1.88786	1.80712	5.54119	3.53673	4.65416	1.98988
ATP12A	0	0	0	0	0	0	0	0	0.111552	0.14862	0.195526	0.0334888
ATP13A1	36.7057	41.2298	34.9867	35.0354	31.4414	30.3657	25.2374	26.4713	21.597	26.3096	31.7442	24.1711
ATP13A2	53.2098	55.2951	30.3318	31.9706	40.6482	40.7441	49.2437	43.5215	22.986	14.6263	26.9791	11.5964
ATP13A3	25.2964	25.8568	11.9159	17.7014	16.266	21.5292	16.1704	17.3181	32.4409	22.2866	19.1416	6.53366
ATP13A4	0	0	0	0.0152181	0	0.0274665	0	0	0	0	0	0.00964274
ATP13A5	0	0	0	0	0	0	0	0	0	0	0	0
ATP1A1	1103.45	1110.25	525.966	301.49	475.41	317.544	421.08	311.334	411.038	424.31	398.887	154.043
ATP1A1OS	603.047	618.161	283.243	170.68	262.299	175.333	247.312	171.062	241.177	242.855	231.593	91.8017
ATP1A2	0.0198613	0.0603616	0.949986	0.459233	0.114039	0.159395	0.0474041	0.0945351	0.0279379	0.198462	0.609228	0.149224
ATP1A3	1.93515	1.6695	5.11029	4.11503	5.98872	2.66408	8.24931	5.17362	1.90648	2.48427	0.320431	1.01076
ATP1A4	0	0	0.086197	0	0	0	0	0	0	0	0	0
ATP1B1	6.30692	5.48786	19.5565	48.3098	52.8645	68.5799	20.5497	17.3557	131.099	130.75	335.545	38.1448
ATP1B2	0.267187	0.135337	0.657786	1.82169	0.993695	1.501	0.219213	0.176632	4.72931	5.17283	9.8605	1.16684
ATP1B3	174.665	169.276	64.7049	47.4013	70.5034	45.2169	99.0421	96.4617	188.629	93.5481	66.2462	82.4899
ATP1B4	0.114575	0.174136	0.167658	0.258198	0.0717347	0.245267	0.164104	0.169693	0.161191	0.0936596	0.200871	0.568364
ATP2A1	0.127012	0.144745	0.250152	0.241653	0.165746	0.305798	0.227354	0.285476	0.401996	0.3133	0.208716	1.36631
ATP2A2	105.513	106.563	126.94	141.375	104.896	126.45	81.2811	72.5752	128.67	167.075	162.394	29.3886
ATP2A3	4.33205	4.424	3.38008	2.00108	3.00339	1.75616	1.83342	1.44198	1.4087	2.35049	2.07653	0.373328
ATP2B1	11.5467	12.7081	4.87287	4.07893	5.39093	4.021	16.8	18.4064	16.1146	13.5893	11.4274	9.58021
ATP2B2	0.00605377	0	0	0.00717899	0.0126441	0	0.0361417	0.00640347	0.00567675	0	0	0.0090988
ATP2B3	0	0	0.00922879	0	0	0	0.0100251	0	0	0	0	0
ATP2B4	25.7349	27.3743	48.535	71.4461	60.2342	57.9269	47.6389	39.1867	46.9616	20.4832	31.3615	9.26022
ATP2C1	29.9617	30.5684	36.672	35.8638	37.1613	38.4767	32.2404	30.6679	26.0786	27.1576	39.2034	12.4014
ATP2C2	0.016421	0	0	0	0	0.0175713	0.0391929	0.0173689	0	0	0	0.0987009
ATP4A	0	0.0157726	0	0	0	0	0	0	0	0.0141432	0	0
ATP4B	0	0	0	0.095582	0.0420763	0.301896	0.0480987	0	0	0	0.0441539	0.0302822
ATP5A1	275.315	278.408	264.007	145.523	197.241	124.128	207.424	202.276	292.967	278.894	167.542	195.181
ATP5B	858.959	857.612	666.779	412.172	574.954	351.802	475.526	439.103	837.243	775.677	354.13	421.407
ATP5C1	270.009	265.908	179.949	112.373	163.009	120.509	143.916	148.836	172.49	132.413	87.1372	152.355
ATP5D	234.727	218.153	234.763	126.559	158.826	91.2961	91.4652	97.9984	173.709	166.533	107.143	214.099
ATP5E	1036.24	923.484	1083.69	733.476	889.815	642.405	968.112	1006.04	626.22	632.828	539.47	1018.46
ATP5EP2	0.9532	0	0.715177	0	0.3317	0	1.51671	1.3443	0.29796	1.15452	0.696158	0.238724
ATP5F1	101.11	100.52	77.9113	49.5952	69.9036	44.4347	57.8044	61.752	102.119	100.534	68.6864	82.72
ATP5G1	251.774	230.294	153.595	113.049	162.062	83.7385	123.559	114.793	327.955	250.074	126.027	354.571
ATP5G2	411.573	387.61	519.481	274.342	364.711	241.487	341.002	347.013	284.89	335.149	229.22	451.448
ATP5G3	91.1563	89.3609	66.2999	33.443	52.9667	28.1813	38.549	34.9375	145.431	122.746	50.5357	101.508
ATP5H	235.642	234.575	237.533	184.029	220.421	158.824	248.274	234.025	428.991	446.803	280.773	632.378
ATP5I	236.831	211.738	261.261	177.419	203.068	146.269	192.258	206.906	381.667	452.842	299.281	648.064
ATP5J	244.507	235.34	183.407	127.652	171.194	122.89	129.022	126.784	144.699	129.179	80.9593	179.683
ATP5J2	506.931	475.221	382.837	306.696	475.836	315.556	535.056	491.226	915.43	929.931	610.312	1288.07
ATP5J2-PTCD1	3.59705	5.42504	3.65677	6.4896	7.13683	2.99707	2.40767	3.47713	5.4842	7.69373	4.16358	14.1681
ATP5L	66.0342	64.8452	81.0955	44.9868	62.3444	40.8114	59.6423	58.5467	99.9097	107.805	70.9329	119.44
ATP5L2	0	0	0.197601	0.20819	0	0.187877	0.104765	0.0928562	0.16465	0.239242	0	0.989376
ATP5O	316.529	322.682	328.89	201.55	268.575	178.172	221.383	205.946	257.936	222.115	132.791	219.5
ATP5S	2.80749	2.71996	3.60094	3.03592	3.34954	2.99511	1.95858	2.65677	9.26726	12.2741	6.94936	7.1124
ATP5SL	34.6965	34.3979	43.2948	29.3203	37.1681	27.2394	30.9803	31.0244	25.2703	30.2445	21.5881	24.9396
ATP6AP1	49.2304	48.0021	88.8166	88.0196	86.7317	70.9369	66.2177	58.6615	89.6967	124.423	167.534	73.5626
ATP6AP1L	0.848568	0.764128	2.54669	2.90676	1.87017	2.01781	1.35022	1.39619	1.14943	1.54168	1.0329	2.69191
ATP6AP2	32.458	31.2939	48.1073	53.4898	57.268	60.6206	58.4252	67.8797	78.4068	91.846	100.056	31.7521
ATP6V0A1	19.4916	20.3888	21.2041	21.9934	20.4123	19.0789	17.0541	15.64	22.6889	27.8155	34.3508	13.8131
ATP6V0A2	4.12904	3.93246	4.32233	4.36827	3.60502	4.43592	2.85225	2.73725	4.48264	5.5626	4.50533	2.7679
ATP6V0A4	0.203096	0.224452	1.70397	0.831954	1.19509	0.82981	1.10173	0.117171	43.5299	39.2652	2.16434	0.374554
ATP6V0B	205.17	198.263	147.144	117.716	179.962	116.471	110.845	102.776	125.202	116.812	128.946	161.407
ATP6V0C	421.741	439.225	374.406	314.714	354.56	249.047	296.927	254.332	419.833	445.764	473.019	409.041
ATP6V0CP3	0.125864	0	0.141652	0	0.131397	0	0	0.13313	0	0.114335	0	0.189132
ATP6V0D1	95.2769	96.3401	106.426	79.1326	92.4348	61.2318	90.6551	87.85	49.1178	76.8072	84.3911	78.2238
ATP6V0D2	0.578781	0.439752	0	0.0285953	0	0.0258053	0.0863382	0.051016	0.203536	0.0657207	0.0528382	0.253667
ATP6V0E1	149.692	140.485	197.515	178.776	214.502	166.526	202.084	191.662	178.306	134.651	204.332	212.434
ATP6V0E2	10.2068	9.22845	4.2407	8.22396	17.3773	19.4954	17.5174	12.8764	47.7029	70.79	61.1022	33.1327
ATP6V0E2-AS1	0.309972	0.166241	0.184672	0.151331	0.342615	0.663328	0.522204	0.385708	3.29983	2.53402	2.19709	2.82189
ATP6V1A	29.2536	28.7915	28.5833	26.4318	28.477	25.2282	28.5051	27.4679	24.4531	32.4013	34.4595	7.11775
ATP6V1B1	0.210746	0.182997	0.203298	0.678275	0.37716	0.80539	0.359286	0.382134	0.0564659	0.218791	0.16491	0.701222
ATP6V1B2	141.973	142.447	118.092	121.258	116.877	85.593	55.9051	42.2354	94.2603	113.397	109.672	75.4655
ATP6V1C1	40.2116	39.8705	17.4759	17.4214	15.7248	15.3151	14.53	14.6364	28.8207	23.3457	23.1081	18.0389
ATP6V1C2	0.450573	0.438196	0.223121	0.42741	0.263413	0.520777	0.301122	0.629173	0.371884	0.37655	0.315896	0.230181
ATP6V1D	26.2805	23.7167	31.0815	25.2852	30.8396	23.4811	27.8216	23.7969	21.8319	22.0072	26.4686	21.0438
ATP6V1E1	138.344	133.568	141.252	125.499	140.619	102.659	127.592	114.407	227.103	241.438	346.623	157.805
ATP6V1E2	1.58912	1.96761	2.68268	2.65196	2.08908	1.63746	2.07202	1.86761	6.15407	3.07425	3.12715	3.22811
ATP6V1F	146.084	144.754	241.965	155.1	210.08	127.296	182.105	151.335	199.58	295.766	293.399	346.072
ATP6V1G1	37.1249	37.1958	40.9461	32.3552	39.2607	30.3504	33.6712	26.9379	57.2003	55.5778	59.6638	38.7715
ATP6V1G2	0.0839203	0.335296	2.6704	1.72275	1.03429	0.673432	0.972155	1.33083	0.157409	0.215537	0.193687	0.409794
ATP6V1G2-DDX39B	0	0.0408309	4.63282	1.00088	0.887086	0	1.08268	0.373856	0.338693	0.113046	0.709057	0
ATP6V1G3	0	0	0	0	0	0	0.582556	0.129076	0	0	0	0
ATP6V1H	32.1384	33.6151	30.6393	26.6563	27.2106	23.302	27.1596	25.1359	44.0628	39.0927	44.9723	26.3071
ATP7A	4.1995	4.52899	13.8027	6.5347	5.4505	5.01323	2.73155	2.27432	10.4485	22.047	16.1435	1.87608
ATP7B	8.73134	9.14834	12.0733	7.50018	4.74325	4.56391	2.36259	1.07752	2.62721	1.92955	0.993548	0.379858
ATP8A1	0	0.00657906	0.021975	0.00770057	0.0475782	0.0208929	0.0466181	0.0275407	0.0244157	0.0118172	0.014255	0.0489173
ATP8A2	0	0	0	0	0	0	0.181739	0.218609	0.0714058	0.00988141	0.0119167	0.0163457
ATP8B1	0.173085	0.193801	0.369087	2.76526	2.13979	1.69613	3.20705	3.95059	0.623625	0.231708	0.229535	0.355911
ATP8B2	34.1125	33.9512	40.7366	46.569	39.1377	39.4402	29.3529	30.6624	26.7711	29.5662	33.7427	9.15501
ATP8B3	0.32902	0.27831	0.889442	1.12757	0.960162	1.561	0.994119	0.911669	0.969823	0.61947	0.772189	1.1982
ATP8B4	0	0	0.032224	0.0339508	0.0597822	0.0102127	0.261965	0.222092	0	0.00866993	0	0.0143417
ATP8B5P	0.276376	0.379977	0.0222174	0.210672	0.167787	0.147868	0	0	0.0422642	0.020469	0	0.048694
ATP9A	4.03661	4.03908	6.2087	5.48336	6.45415	5.67583	17.8575	17.5429	9.64282	8.78119	10.9622	1.69733
ATP9B	1.7353	1.91082	5.59003	5.27826	3.8332	4.58834	3.03128	2.95272	2.3938	3.96373	6.52964	1.54943
ATPAF1	22.2541	19.9139	23.124	19.4245	23.0026	20.1053	22.8916	22.1312	25.3097	37.5782	21.1557	17.1506
ATPAF2	9.84246	9.65689	9.81236	7.1678	8.17154	4.68547	7.39892	8.27932	17.297	21.2259	16.5133	19.6811
ATPBD4	3.72451	3.26142	4.38375	3.34207	3.50997	3.64021	3.09739	3.40045	6.77941	5.56497	4.85227	3.1965
ATPBD4-AS1	0	0.0415684	0	0.0973089	0.0428365	0.263444	0.146903	0.0868029	0.0384792	0.223646	0.224758	0
ATPIF1	66.5537	66.7522	76.5582	65.4596	73.9188	50.5268	107.147	115.729	90.6961	86.4004	54.0151	173.102
ATR	5.946	6.41817	4.33947	4.17176	3.65937	5.38315	5.70146	5.80862	8.21176	5.70799	4.51563	2.29711
ATRAID	89.5257	79.5673	176.408	150.103	184.2	127.114	186.341	214.532	155.636	191.773	241.477	250.442
ATRIP	9.67623	9.37876	6.90536	6.0997	5.8377	4.97073	5.27155	4.30621	3.84534	4.22149	2.55776	5.95865
ATRN	33.333	35.0766	57.2011	57.4438	46.0788	51.2713	36.8837	30.7058	18.6719	23.3068	26.3971	3.51788
ATRNL1	0.955522	0.806662	1.27529	2.04813	2.3915	3.78179	1.89319	1.45123	0.528444	0.834614	1.6574	0.510824
ATRX	4.5245	4.37605	6.805	6.86271	5.64683	7.94639	6.80706	6.84846	7.80722	8.31516	10.4143	12.5759
ATXN1	3.87375	3.82238	8.46245	10.1589	7.82719	8.31176	11.5451	10.7755	5.24028	3.64688	3.47764	4.0293
ATXN10	38.6332	37.6652	40.113	33.8021	35.9355	35.4569	44.0505	45.4411	79.6692	78.2179	80.9125	54.6245
ATXN1L	9.39037	10.1191	12.0911	13.8356	12.8626	14.5884	15.3042	13.8738	5.91104	9.03056	11.859	4.23522
ATXN2	9.17425	8.3293	13.0958	12.4068	11.2748	10.6371	10.8375	10.1583	17.5224	16.0665	15.2283	9.6239
ATXN2L	85.0158	88.35	67.6211	74.0008	70.8504	68.9197	70.879	68.2678	75.6933	73.6233	69.0473	55.3609
ATXN3	1.1195	1.21681	2.23807	1.77768	1.39261	2.2587	1.91295	2.30985	1.25501	0.933899	1.40723	1.63499
ATXN3L	0	0	0	0	0	0	0	0	0	0	0	0
ATXN7	6.67461	7.33891	6.09133	7.53126	5.6983	6.1111	5.88782	6.39068	3.11921	2.7422	2.67328	1.32274
ATXN7L1	3.25717	2.72482	5.04045	4.97204	4.08326	4.37469	5.39031	5.22187	3.14734	4.87615	5.34071	3.95847
ATXN7L2	2.36779	3.07712	3.92991	2.8076	2.34703	2.25215	2.62588	2.37799	1.92887	2.91133	2.67254	3.03688
ATXN7L3	24.4142	23.5312	27.3138	22.5897	22.6187	19.6107	28.8801	27.1926	17.6458	17.6527	16.3704	15.1888
ATXN7L3B	43.4191	44.1532	75.5209	47.7264	49.4669	42.7162	58.4291	58.1893	12.6897	22.3473	29.2042	14.3872
ATXN8OS	0	0	0	0	0	0	0	0	0	0	0	0
AUH	3.05709	3.55581	4.16266	2.72989	3.03387	2.05968	3.69331	4.43119	5.98144	6.61697	4.92023	4.50872
AUNIP	7.67912	8.06432	2.21599	1.86779	2.84842	2.52833	2.14836	1.45787	6.40989	4.29276	2.49603	4.86082
AUP1	158.198	153.379	118.162	121.701	139.114	120.138	91.1201	90.8329	105.881	90.2877	97.2678	195.976
AURKA	93.4155	76.9972	12.9842	20.5554	36.0801	24.0125	31.1924	22.1412	52.1532	42.4695	13.0007	35.6952
AURKAIP1	225.415	216.382	146.396	102.56	146.959	92.5334	162.835	165.774	145.893	135.889	109.316	318.015
AURKAPS1	1.13639	0.674855	0.264607	0.232322	0.163634	0.41931	0.374109	0.165792	0.881934	0.391562	0.343427	1.20711
AURKB	55.0069	50.9927	6.37945	8.95918	20.7495	17.3617	14.5181	8.10284	73.8212	46.9226	19.2274	77.003
AURKC	0.115307	0.0583359	0.194758	0	0	0.160308	0	0.121448	0.10812	0.20961	0.189575	0.433545
AUTS2	6.35664	6.60516	7.71217	6.82024	7.71227	10.5674	3.51616	2.13373	1.19277	1.18844	2.1202	1.0586
AVEN	12.3206	11.3649	9.56893	8.30807	9.57475	7.32898	15.2199	15.4883	7.27194	8.93937	11.5137	13.4565
AVIL	0.149734	0.132723	0.273838	0.687967	0.273556	0.54073	0.826388	1.16796	0.0702204	0.204015	0.471582	0.435933
AVL9	20.4419	19.5021	12.2006	11.9609	12.0024	12.2244	20.392	20.1565	23.5918	23.9129	15.7372	6.51967
AVP	0	0	0	0	0	0	0	0	0	0	0	0
AVPI1	20.8411	21.7813	11.4308	15.6407	21.0687	16.0907	14.7969	12.0918	16.4929	14.4587	10.7414	11.5953
AVPR1A	0.102731	0.117948	0.038539	0.09745	0.0929471	0.175884	0.980775	1.217	0.0706476	0.0186642	0.0450169	0.257283
AVPR1B	0	0	0	0	0	0	0	0	0	0	0	0
AVPR2	0.0373907	0.034654	0	0.130756	0.0767453	0	0.175466	0.352964	1.76869	0.549933	0.628231	1.26372
AWAT1	0	0	0	0	0	0	0	0	0.0409908	0	0	0
AWAT2	0	0	0	0	0	0	0	0	0	0	0	0.0204405
AXDND1	0	0.0307835	0.0170993	0	0	0	0	0	0	0	0	0
AXIN1	16.987	16.8483	15.9709	13.476	14.31	12.0495	12.9531	9.99055	17.9811	16.9076	15.7319	17.341
AXIN2	0.1685	0.249484	0.466797	0.722348	0.866005	1.12343	1.29932	1.46695	0.559127	0.835977	1.29215	0.555092
AXL	2.58122	1.09216	3.4541	24.2538	59.7127	72.9646	128.145	128.805	1.62148	4.49534	47.4528	53.2402
AZFP	0	0	0.0650295	0	0.0603215	0	0	0	0	0	0.1266	0.390719
AZGP1	6.4001	3.98993	16.068	13.7184	18.6566	17.3318	2.40883	0.15622	30.84	115.517	399.108	86.222
AZGP1P1	0	0.0541621	0	0.12679	0	0	0	0	0.250685	0.242835	0.937127	0.441864
AZI1	12.5902	11.1695	5.98183	6.98275	8.04581	7.89974	8.05506	7.68574	15.7211	12.6988	8.98185	22.2671
AZI2	23.1518	21.5287	37.1701	22.9075	24.9739	21.7616	23.4284	23.7495	14.1162	15.1958	17.7496	9.50652
AZIN1	68.7895	64.4645	39.4142	49.5922	50.3158	58.2018	53.1904	60.4218	49.9094	35.7361	45.2227	22.7798
AZU1	0	0	0.166063	0.0874811	0	0	0.792399	0.62429	0	0	0	0.554313
B2M	576.18	578.091	1608.56	1128.62	1351.08	1186.4	2715.54	3139.5	459.559	472.378	632.743	466.284
B3GALNT1	4.79929	5.52924	2.0984	1.277	1.25811	0.677064	3.8241	4.88004	0.015149	0	0	0
B3GALNT2	11.347	11.4365	6.61292	7.41994	8.04208	8.77531	5.92168	5.23632	10.3913	6.36736	6.04424	3.82685
B3GALT1	1.96812	1.96687	3.35242	2.0814	1.22167	1.22375	0.285654	0.19692	1.64611	2.02944	7.34235	0.239791
B3GALT2	0.109344	0.0316489	0.175799	1.31506	2.38085	3.69397	0.782932	0.165223	0.0732421	1.54668	1.91659	0.798063
B3GALT4	0.422954	0.642712	14.5182	6.93763	6.88076	4.9407	3.95383	4.02633	0.958528	5.15485	5.71464	1.08575
B3GALT5	0	0	0	0.229867	0.17989	0.0460923	0.488404	0.364532	0	0	0	0
B3GALT6	10.9756	9.89253	15.4177	17.3444	16.808	16.4941	15.7225	16.048	8.19243	9.3288	14.9635	13.1274
B3GALTL	6.85008	6.27985	4.41161	3.11927	5.22064	5.23966	5.0354	5.02778	6.85122	6.49472	2.76775	2.93538
B3GAT1	0.0314631	0.0796904	0.194773	0.29849	1.18226	1.68356	0.694708	0.0332795	6.38882	8.50614	9.93604	6.4543
B3GAT2	1.39617	1.38364	1.05892	0.863739	1.14068	1.00681	1.37639	1.15573	0.711566	0.661712	0.864506	1.20862
B3GAT3	42.9656	42.4585	50.7278	49.3515	49.37	37.8461	33.8792	33.027	37.9056	40.0867	43.286	74.3675
B3GNT1	25.5856	23.6793	34.1507	37.6403	38.3997	32.1406	32.5711	34.9681	31.3961	33.8459	48.0851	23.1563
B3GNT2	17.569	18.1726	13.8595	8.34756	11.0134	8.25785	11.7569	9.07452	16.2832	11.1867	14.7725	3.73183
B3GNT3	0.207611	0.126193	0.257019	0.76314	1.47381	0.266586	3.09699	3.33786	0	0	0	0
B3GNT4	0.0401806	0.0814101	0.0452207	0.0952879	0.251681	0.214977	0.143852	0.0850001	0.15072	0.1095	0.352145	0.483024
B3GNT5	5.3448	4.99599	1.75507	1.59625	2.46288	4.022	2.37002	2.2416	3.42478	1.85249	1.29955	0.340486
B3GNT6	0.135734	0.114588	0.30552	0.080473	0.0236168	0.0968284	0.242973	0.119641	0.106072	0.0616506	0.0247829	0.322941
B3GNT7	8.59642	7.61038	1.76998	2.95113	5.49935	6.45374	6.21359	3.50463	69.7751	17.3796	8.86543	4.30203
B3GNT8	0	0.0316866	0	0.148353	0.0326533	0.0334695	0.149308	0.198504	0.0586637	0.0284133	0.0685313	0.117502
B3GNT9	1.79617	1.79845	7.21618	10.1041	7.39147	5.87772	5.13445	5.10309	1.33184	1.61267	1.89907	3.26395
B3GNTL1	1.59495	2.15436	2.89197	2.73174	2.17383	1.99113	2.22062	2.06192	5.40112	5.47347	4.27113	8.45496
B4GALNT1	7.18558	6.26101	2.43026	5.98184	11.738	17.091	11.0632	8.52581	15.6764	26.1265	46.8232	14.1263
B4GALNT2	0	0	0	0	0	0	0	0.182479	0	0	0	0
B4GALNT3	2.95579	2.78166	8.8708	11.6636	13.6581	15.2957	11.8929	9.8576	1.92363	7.2775	13.6601	2.4999
B4GALNT4	3.51984	4.03797	12.5533	19.153	10.772	14.3777	5.23625	5.23604	6.05899	2.90543	11.2159	9.4311
B4GALT1	16.4877	17.0473	13.332	22.4029	28.9514	23.4071	91.4214	103.24	14.6769	8.84872	13.8942	14.1953
B4GALT2	56.498	55.3036	63.445	51.0169	59.8109	44.2046	48.4224	44.643	27.3095	28.1596	42.1134	40.2251
B4GALT3	26.0231	26.8839	22.7266	16.4357	18.0318	13.088	14.6527	11.8382	36.4179	35.7103	25.2325	17.3274
B4GALT4	10.8123	10.1554	9.23997	9.51637	11.0282	9.19113	12.1051	11.7494	33.0817	25.9056	19.3594	18.5164
B4GALT5	38.4836	37.5121	18.5432	18.3321	24.0714	24.0183	33.1386	28.5046	34.5186	18.8795	19.5427	12.3967
B4GALT6	9.74452	9.61918	2.84373	4.56806	5.47678	8.15985	2.94779	1.29437	46.4874	12.0016	24.8756	4.60566
B4GALT7	12.9131	11.659	21.3561	22.6223	19.5954	17.1164	16.5957	15.3251	11.3707	14.5929	15.7224	24.1651
B9D1	7.23352	6.87033	7.50166	4.65396	7.56225	6.10327	10.8691	10.6514	13.8767	15.0958	18.3637	25.8001
B9D2	3.53704	2.49545	3.19879	3.96935	4.61565	2.9062	4.22103	3.74122	2.36923	3.04093	4.22082	6.07427
BAALC	75.6297	76.0446	19.4986	8.95354	20.7791	6.2465	4.67782	2.84085	28.1167	7.34065	2.06112	0.97108
BAAT	0.0823068	0.0484883	0.0538674	0.0195152	0.017181	0.102433	0.0380796	0.0168755	33.6028	22.3911	15.4333	4.06518
BABAM1	75.333	65.899	75.6138	68.9929	81.5477	59.5358	69.3394	71.3005	40.9644	61.035	56.4902	80.0326
BACE1	14.256	13.8258	18.8613	18.8803	18.821	19.3134	19.5743	19.6945	2.6029	5.14614	12.3489	3.86784
BACE1-AS	5.36411	3.3852	5.938	6.77755	5.1409	5.08121	5.56189	4.55761	2.88623	3.1154	4.62408	2.31243
BACE2	138.833	137.58	155.756	144.155	169.374	138.924	109.315	83.8753	93.9311	66.9167	83.0508	33.076
BACH1	8.38536	7.79462	6.5325	9.15156	10.3584	14.9125	6.3159	5.75156	7.11225	4.20808	9.51908	2.33209
BACH2	0.320994	0.500458	0.944029	0.424274	0.25719	0.596291	0.145275	0.186128	0.515446	0.421269	1.564	0.453939
BAD	44.1194	42.4129	57.9442	60.4803	64.4967	44.0714	50.4545	51.3554	22.893	41.5031	50.948	62.7108
BAG1	13.3969	12.9949	14.9332	12.0195	13.2872	8.37881	7.52657	7.04748	12.2828	15.1831	13.8342	14.6223
BAG2	26.1316	25.8144	4.86448	5.56062	10.8826	5.01808	13.6202	16.4645	15.4715	10.9066	4.79701	9.04203
BAG3	43.1871	41.2022	18.5029	18.0553	23.0381	13.2238	52.5657	51.8891	33.5047	17.2602	13.6351	34.8023
BAG4	6.84769	6.43443	4.7959	4.52169	4.91572	5.26142	4.10818	3.67482	10.4526	9.26336	9.67761	5.33214
BAG5	6.88575	7.15878	5.07696	6.55349	6.31735	6.78743	7.20153	7.04237	10.8056	10.0642	12.3824	8.39598
BAG6	187.483	186.948	140.549	132.622	135.115	106.272	112.07	108.401	93.8352	87.7804	79.0641	74.0722
BAGE2	3.09632	2.50939	3.13624	4.14873	2.61826	4.40659	2.36485	2.6528	0.145181	0.140635	0.271363	0.2559
BAHCC1	16.0998	16.5701	19.9064	12.963	10.357	8.8886	6.24803	4.43468	14.3213	16.4437	9.18616	4.26048
BAHD1	22.3709	22.0263	29.4209	23.0725	22.0547	18.778	21.548	19.1242	14.1105	21.5624	21.9919	9.79787
BAI1	3.14942	3.65767	2.71632	1.37277	0.542855	0.745398	0.187337	0.207553	3.95629	1.58644	1.65524	1.28265
BAI2	3.76903	3.95024	6.15964	18.7679	16.8062	12.732	13.4338	14.2818	3.43107	3.5877	7.71991	5.30209
BAI3	0	0	0	0	0	0	0.0229473	0	0.0180322	0	0.0105327	0.0650127
BAIAP2	14.0408	13.5429	14.231	14.0057	17.6714	13.4777	14.5614	14.0898	9.64927	13.3816	18.6037	42.0409
BAIAP2-AS1	1.5979	1.41798	7.75095	7.4466	6.46564	6.95863	6.28242	6.48541	5.92413	8.7317	15.4153	8.06883
BAIAP2L1	12.0867	11.8323	2.37456	4.05649	4.75142	2.66087	16.3844	15.7016	33.735	15.4152	14.9086	15.7958
BAIAP2L2	34.1505	31.3793	5.99683	5.39279	10.6196	5.12579	8.73541	7.51472	0.832807	0.586712	0.530668	1.31426
BAIAP3	0.15844	0.183772	0.164596	0.439444	0.279949	0.313027	0.927382	1.15798	0.354345	0.332174	0.694398	0.476229
BAK1	44.6978	44.0574	46.6691	31.9184	37.999	25.5444	30.5883	27.9724	13.7422	14.6955	17.1182	10.5366
BAMBI	114.195	117.496	43.5488	63.7301	83.9131	76.1556	59.0141	42.0919	99.2895	64.7134	72.8095	20.3716
BANCR	0.665399	0.337042	0.873675	1.97248	2.19972	1.66136	1.05877	0.469207	5.9279	7.9586	2.06536	2.99962
BANF1	385.358	362.778	281.983	227.298	303.429	178.408	178.357	180.429	126.636	139.924	113.774	206.06
BANF2	0	0	0	0	0	0	0	0	0	0	0	0
BANK1	0	0.0186166	0.0413673	0	0	0	0.021931	0	0	0	0	0.0138063
BANP	7.7044	7.94723	8.30355	7.78343	8.76736	8.12544	8.33902	8.87051	3.25989	4.84061	4.03826	5.31118
BAP1	35.7813	34.4171	41.2085	38.214	37.3057	30.9807	38.921	36.1309	21.1092	30.8196	28.5865	16.9706
BARD1	6.2169	5.24103	0.831779	1.88158	3.5174	5.00094	2.85351	1.70143	5.035	3.98876	2.59567	1.76386
BARHL1	0	0	0	0	0.0320206	0	0	0	0	0	0.0672033	0.0230451
BARHL2	0.0404294	0.0409571	0.0455007	0.143817	0.253239	0.259569	0.0482476	0	0.0758267	0.146905	0.132872	0.0303759
BARX1	0.0408723	0	0.0459991	0	0.341351	0.349884	0.0487761	0.0432317	0	0.0742569	0	0.0307087
BARX2	0	0	0	0	0.0348887	0	0	0	0	0	0	0.0251093
BASP1	0.0327902	0.166091	0.33213	1.86628	5.47706	0.842095	89.0235	104.015	0.0307496	0.0893602	0.107766	46.5874
BASP1P1	0	0	0	0	0	0	0	0	0	0	0	0
BATF	11.1273	10.7699	6.85975	4.70618	5.84519	2.5027	6.25892	7.34663	0	0	0	0
BATF2	1.67281	1.55798	13.7555	2.84732	2.67585	1.27032	3.57402	3.56729	0.480733	0.0980379	0.206904	0.993309
BATF3	11.4284	10.2836	3.10199	3.90592	8.14098	4.67578	3.93107	3.05758	6.30421	2.19845	2.13574	7.22278
BAX	133.341	123.673	94.8042	80.1224	112.491	94.4535	103.723	107.921	65.1696	63.9749	54.4971	121.969
BAZ1A	13.2682	13.0924	7.71764	6.245	6.76097	7.12261	8.1267	7.64334	8.20867	6.19152	4.19975	11.0679
BAZ1B	54.1881	55.3699	26.4946	31.2465	38.5437	43.1099	57.6224	53.9419	49.117	44.673	34.9288	38.2634
BAZ2A	24.577	25.7978	26.2691	26.3785	21.419	25.6615	29.9829	30.7391	20.8955	20.5184	19.6908	11.9132
BAZ2B	1.43398	1.87918	2.47261	2.51151	2.08072	2.9281	3.43828	4.13283	6.19322	4.73848	4.32369	3.40024
BBC3	5.27507	4.81338	47.229	17.9787	20.2698	9.4092	15.5285	13.3385	5.89973	13.3062	12.2881	11.9949
BBIP1	5.45118	4.74106	7.13821	7.19662	8.52172	9.09215	8.02245	6.90399	5.11644	4.46209	3.85623	6.06229
BBOX1	0	0	0	0.0736471	0.129681	0.0664615	0.926517	1.60955	0.436839	0.677055	0.340212	0.0466656
BBS1	2.96978	3.09211	18.5683	16.0615	11.2989	10.4691	9.43117	10.5754	3.34195	9.59201	12.128	4.12789
BBS10	0.680185	0.642081	1.82677	1.888	1.33948	1.7865	1.97395	1.91308	1.79759	1.41832	2.40479	1.05693
BBS12	0.584205	0.731086	1.64372	2.85238	2.95975	3.67725	2.27609	2.19911	2.4331	3.01248	6.56945	1.35873
BBS2	7.84526	7.56245	12.8386	14.3334	15.0431	15.8474	16.7663	17.7817	12.8748	10.7991	14.4704	9.90921
BBS4	5.41616	4.65989	10.7355	8.76875	9.93507	9.44501	9.56563	10.8929	13.8371	21.9468	20.604	11.3297
BBS5	8.41987	9.78416	13.3779	11.9135	8.99312	11.2432	8.99263	9.93497	15.5761	23.4922	26.0055	27.9758
BBS7	3.10361	2.65739	2.36225	2.21482	2.61061	1.81423	4.01747	4.11188	5.63549	5.69357	4.26584	3.33194
BBS9	2.50176	2.0192	5.424	5.12749	4.30248	4.36607	7.32096	7.56871	4.16015	4.42505	5.17492	2.56127
BBX	11.5677	11.6338	11.7959	11.0377	9.99412	11.6525	18.8125	18.8407	19.944	18.3482	15.3818	11.2726
BCAM	1.55568	1.52942	9.69489	16.274	26.9605	27.6662	54.5271	56.5872	5.27443	11.0288	20.7157	15.0369
BCAN	1.26535	1.175	155.632	58.792	46.6124	16.6352	3.73889	1.33381	11.3678	32.1748	111.533	26.8745
BCAP29	9.44705	9.39972	5.06523	6.52928	8.04281	11.1521	9.43366	9.38736	23.7851	10.8751	7.62662	8.43837
BCAP31	124.273	125.767	114.823	102.254	116.421	80.3957	108.494	99.2641	186.654	146.655	176.325	157.967
BCAR1	62.8415	65.494	47.9983	48.6815	55.6614	44.7732	75.3247	79.7804	14.7657	26.0832	44.4108	36.316
BCAR3	6.17582	5.81859	16.5919	15.1515	15.9939	16.6456	10.6327	9.20601	10.1746	18.613	30.1305	12.4605
BCAR4	0	0	0	0	0	0	0	0.0497748	0	0	0	0
BCAS1	0.271475	0.46915	27.8929	116.623	69.3852	77.9889	2.68707	1.35128	0.239605	0.0870385	1.20711	1.00784
BCAS2	35.0447	31.7018	22.339	20.6081	23.6961	24.0852	24.311	24.0589	28.099	19.6702	18.6756	17.4821
BCAS3	2.86577	2.63009	10.8415	9.47496	7.87826	7.61188	6.86441	6.98232	72.456	55.7261	17.2733	32.74
BCAS4	0.183602	0.0464996	0.384904	0.892463	1.80835	1.71817	2.89568	3.9806	3.19173	4.16178	4.48798	4.79335
BCAT1	0.10048	0.105085	0.0324269	0.0341647	0.120995	0.0431644	3.21777	3.80346	0	0.00523305	0.00631132	0
BCAT2	22.6516	22.9752	18.9015	20.1249	25.7841	19.8115	26.1916	26.4527	24.9914	22.8904	22.0568	30.5109
BCCIP	50.5364	46.6143	17.1207	20.1009	22.8777	23.128	24.4082	25.4436	37.8208	32.155	19.4289	53.3229
BCDIN3D	0.720485	0.799401	1.69894	1.76964	1.54013	1.7989	2.10858	1.97776	2.09128	1.96347	2.42426	2.56484
BCDIN3D-AS1	0.149453	0.0183612	0.36742	0.642634	0.265082	0.3487	0.441558	0.424688	0.623038	0.596758	0.719662	0.770749
BCHE	12.5057	13.3767	43.612	14.4972	17.2613	12.2354	6.94786	5.7886	30.7926	32.8324	15.1032	5.84401
BCKDHA	8.55055	6.9095	29.9226	20.4385	23.7227	19.5825	17.7479	19.04	14.2283	28.8328	34.9538	16.3982
BCKDHB	3.47099	3.4342	11.1019	8.71275	7.28609	8.85549	7.07702	6.64431	4.98216	8.21785	8.146	3.39188
BCKDK	31.6692	30.6585	37.7687	23.4028	29.5925	19.9592	24.6072	25.5467	43.4985	50.651	36.5332	50.4005
BCL10	3.47513	3.44753	4.45818	4.65438	4.49257	4.89388	5.67279	5.42791	6.45019	4.44899	5.247	4.13969
BCL11A	0	0	0	0	0	0	0.0498159	0.0403677	0	0	0	0.0729233
BCL11B	0	0.00714955	0.00794296	0.00836874	0.0221079	0.0226606	0.0589725	0.0373341	0	0.00641073	0	0.0106061
BCL2	3.84092	3.40907	2.4862	1.54004	2.80283	2.04213	1.10431	0.662475	2.88899	2.30298	2.71801	1.45951
BCL2A1	98.3931	95.9482	96.9461	28.2331	34.4752	23.3304	10.7102	2.34588	65.4191	30.9098	38.3696	13.3805
BCL2L1	22.9462	24.041	37.3008	41.9414	51.2308	42.1795	79.5394	77.1968	29.7892	20.0874	23.5431	24.9397
BCL2L10	0	0.077476	0	0	0	0.16367	0	0.0808925	0	0	0	0.0574602
BCL2L11	5.44198	5.66187	2.96003	3.21863	3.76168	4.67496	5.75977	5.44839	13.1292	16.3422	6.12127	3.8101
BCL2L12	31.6733	29.4311	12.9775	14.4454	18.4822	14.423	15.2924	14.9373	19.4076	17.0761	9.94949	30.4631
BCL2L13	23.4247	23.7365	30.8347	25.1178	26.5404	20.906	33.0369	30.6684	47.2988	55.4077	70.3947	21.961
BCL2L14	0.0310052	0	0.034895	0.0367652	0.0323681	0.0331775	0.0370019	0.0656927	0.0581563	0.056335	0	0.116545
BCL2L15	0.240968	0.310689	0.12327	0.285726	0.114345	0.269568	0.313708	0.185366	0.112986	0.238795	0.131991	0.929922
BCL2L2	5.18233	4.89957	4.74399	6.063	5.59347	7.63404	8.11798	7.32235	11.6995	12.5007	16.1702	15.1406
BCL2L2-PABPN1	40.5612	42.5419	38.548	35.6201	39.5171	38.3283	35.7558	32.5906	43.8089	53.4737	41.8526	107.941
BCL3	10.5414	10.9021	16.255	25.4092	27.364	18.8558	46.1888	50.8568	18.8559	8.08942	13.4786	28.9142
BCL6	10.2192	10.9169	28.3411	46.3617	38.1523	44.8425	23.6225	20.9023	10.9384	15.3699	22.2756	7.72693
BCL6B	0.0157287	0	0	0	0.0164201	0	0	0	0	0	0	0
BCL7A	4.9082	5.27329	5.56977	5.47024	4.28719	4.84839	0.777613	0.432763	5.97913	6.78938	7.47048	5.97087
BCL7B	30.8557	29.8115	29.0467	31.3288	42.7682	39.0712	52.6626	51.2764	24.7699	29.2328	29.9867	23.1675
BCL7C	83.8623	75.2476	62.1122	48.015	81.9623	46.9197	64.6228	68.6818	51.7548	88.2971	64.4852	157.461
BCL9	18.9884	20.665	18.6989	17.376	16.9232	18.8738	10.0165	9.43279	14.234	24.1003	29.4693	6.04133
BCL9L	15.4709	16.7753	22.5523	28.0511	24.2916	22.0062	42.9804	43.1828	11.2906	16.7676	19.9251	11.3843
BCLAF1	24.1717	25.0263	13.3268	14.9035	14.3167	17.1279	15.9301	16.9064	21.7922	24.6015	18.1974	16.0406
BCMO1	0	0	0	0	0	0	0.112166	0.0994158	0	0	0	0
BCO2	0.0218415	0	0.0245819	0.0777106	0.0228042	0	0.0260661	0.0693178	0.15744	0.0396884	0.0689698	0.473337
BCOR	11.9484	12.9296	17.6446	19.2934	16.5958	16.9775	14.363	13.4795	9.31293	19.9384	25.2592	4.14532
BCORL1	3.46323	3.48551	5.90167	5.80637	5.15933	5.5305	5.99683	5.82593	5.13689	5.62717	7.21602	2.74376
BCORP1	0	0	0	0	0	0	0	0	0	0	0	0
BCR	10.4346	11.1667	12.0058	8.28228	8.99524	7.36385	15.6698	14.9323	10.645	12.5137	13.7804	6.06524
BCRP2	0.686657	0.596246	0.634791	0.494336	0.716841	0.629793	1.40476	1.34883	0.827903	0.601483	1.02089	0.939689
BCRP3	0.171121	0.0433387	0	0	0.0446608	0.0915543	0.204213	0.0452498	0.120354	0.116585	0	0.128569
BCS1L	34.1489	35.5555	18.6076	14.7075	19.647	15.1347	17.7439	16.7344	19.6222	17.7426	12.294	20.849
BCYRN1	2401.88	2588.02	736.082	795.412	941.513	552.311	771.625	542.006	1237.16	831.109	1263.58	8260.05
BDH1	8.22245	9.37413	7.70983	4.31743	6.24634	4.26361	2.30921	2.06751	3.23078	5.45161	3.60394	1.95853
BDH2	5.48122	5.65018	9.99989	7.98163	8.7539	8.93155	7.39038	7.54709	7.3765	9.78359	8.51194	7.97634
BDKRB1	0.0476159	0	0.0535887	0	0.149127	0	0.113648	0.201458	0	0	0	0.0357754
BDKRB2	0.0130817	0	0	0	0	0	0.843016	1.0516	0	0	0	0.186745
BDNF	0.109221	0.133643	0.18438	0.753316	1.95689	0.320792	8.49176	9.87497	0.655939	0.225063	0.240316	3.90155
BDNF-AS	0.0410035	0.0415358	0.966363	1.11671	1.50293	0.9204	3.17704	4.42234	0.243086	0.470479	0.763053	1.69392
BDP1	8.02436	8.23619	5.00215	5.99378	5.04632	6.7715	5.90049	5.83966	4.40685	3.80617	4.07427	5.33943
BEAN1	0.160533	0.273378	3.05874	2.07106	1.84707	1.34159	3.21414	3.18268	0.0188137	0	0	0.0403438
BECN1	48.0863	46.8309	52.6325	48.8727	53.0405	48.5146	47.5478	40.2053	40.016	32.229	50.6425	31.7974
BEGAIN	0.824089	0.834814	1.87871	0.58389	0.860314	0.746154	0.176512	0.201147	0.376491	0.84451	1.61235	0.730297
BEND2	0.082909	0.071705	0.0796576	0.0839262	0.0615755	0.126229	0.0422351	0.114776	0.0508399	0.0535801	0.0516928	0.427666
BEND3	4.15875	3.92615	2.07613	1.30476	1.4866	1.26403	0.714513	0.573387	1.79822	1.10983	1.21433	1.05775
BEND4	0	0	0	0	0.0063508	0	0.0072613	0	0	0	0	0.00456721
BEND5	0.0928617	0.188148	2.61275	3.90891	3.87774	3.22942	3.15835	2.25911	0.435413	0.80138	1.27163	1.01167
BEND6	0.899882	0.890428	4.1688	11.8862	8.34571	7.45704	4.04586	3.65237	0.157001	0.361201	2.10921	1.0692
BEND7	0.122688	0.170463	0.207118	0.181847	0.896575	0.895789	2.47129	1.84924	0.0287624	0.0557246	0.100804	1.90571
BEST1	17.1788	18.8123	37.6381	15.8168	12.8488	10.6139	4.46084	1.11556	20.4149	30.2543	29.1976	17.8564
BEST2	0.0306004	0.0309998	0	0.108853	0	0.0982321	0	0.0647337	0.0286961	0	0	0.0229911
BEST3	0	0	0	0	0	0	0.0699359	0	0	0	0	0.0440306
BEST4	0	0.0559374	0	0.130946	0.115288	0.147712	0.0329472	0.029202	0	0	0	0.228173
BET1	2.66934	2.33375	4.21819	4.48759	4.48541	4.81274	6.78564	7.19396	7.88687	7.19147	7.3708	5.06886
BET1L	37.3519	38.1709	47.9737	41.4321	37.8321	29.9219	30.8379	30.2885	20.1031	24.8026	28.5746	22.2826
BET3L	0	0	0	0	0	0	0	0	0	0	0	0
BEX1	0.0793834	0.160839	0.268023	5.08294	11.6022	3.39778	53.3355	53.3183	0.297772	1.08168	17.5669	46.5815
BEX2	1.295	0.686017	1.71312	1.78847	2.09513	1.88391	0.986612	0.709454	2.43281	0.990803	2.74773	2.25258
BEX4	1.55057	0.957276	3.59919	1.78113	2.42809	2.28139	1.04086	1.28131	1.40863	2.11281	3.71581	0
BEX5	0	0	0	0	0	0	0	0.0898244	0.238944	0.154296	0.186078	0.191429
BFAR	56.3196	55.5077	40.5236	33.314	36.3797	28.7445	32.3648	29.834	72.6224	71.0503	65.4879	32.8178
BFSP1	1.56548	0.91173	2.70114	9.60807	7.46835	9.14808	12.0202	11.4936	3.58357	3.01191	2.18552	1.9471
BFSP2	0	0	0.496092	0.174225	0.536873	0.0786132	0	0	2.13573	1.26801	0.321933	0.331188
BGLAP	0	0	0	0.886145	0	0	9.59106	8.58206	0	0	0	3.64201
BGN	2.14537	2.62222	6.21989	13.1893	4.38196	3.86768	18.1721	21.4342	0.0656039	0.0635496	0.76639	0.0700819
BHLHA15	0.208103	0.21082	0	0.246757	0.325877	0.111341	0	0.440233	0.878186	0.189042	0.797925	0.156355
BHLHA9	0	0	0	0	0	0	0	0	0	0	0	0
BHLHB9	0.0275917	0.0424939	0.295336	0.348233	0.189791	0.404887	0.499948	0.384598	0.754257	0.629431	1.47049	0.280147
BHLHE22	0.523496	0.530329	0.773274	0.795314	0.648978	0.577673	0.0390456	0.0173036	0.0460235	0.0148608	0.0896083	0.184369
BHLHE23	0	0	0	0	0	0	0	0	0	0	0	0
BHLHE40	76.5167	79.8146	15.6987	11.5955	25.0986	12.9913	43.2677	42.4282	43.136	13.0736	12.4514	15.8453
BHLHE40-AS1	0.0661195	0	0.0744133	0	0.069026	0	0.0789057	0.279745	0	0	0.0724344	0
BHLHE41	4.23607	3.93621	6.14833	3.70655	3.94955	1.96943	7.02504	6.5664	23.095	20.806	21.0269	2.51323
BHMT	0	0	0	0	0	0	0	0	0	0	0	0
BHMT2	0.463279	0.492793	0.417113	0.686664	0.266003	0.867535	0.580512	0.784037	0.434448	0.189378	0.304514	1.86222
BICC1	13.7621	13.5242	6.49382	14.5335	14.9283	14.4386	35.4771	38.4573	2.3862	1.25341	1.43305	1.06361
BICD1	5.46609	5.25442	7.76149	10.3576	13.1301	15.702	11.2399	11.1357	4.13262	8.42428	8.9532	3.00806
BICD2	18.3343	18.4917	15.3898	12.5413	14.9634	12.9522	12.4964	11.2551	11.7845	13.648	15.365	7.68069
BID	13.8658	13.2522	12.3266	13.9925	14.48	13.4606	16.2597	17.0566	23.7556	19.7252	28.6283	32.5242
BIK	0.348694	0.423895	0.784866	0.909617	0.728044	0.447745	0.582574	0.147529	0.130798	0.380105	0.687594	0.733559
BIN1	5.12109	4.51271	1.38456	6.88038	9.40155	3.8359	24.2065	27.9822	20.9378	18.3696	17.0798	42.9984
BIN2	0	0	0	0	0	0	0	0	0	0	0	0.0195545
BIN3	45.1191	45.0701	27.7103	31.734	35.8281	30.3897	12.4371	11.1566	68.6192	22.8528	33.665	60.5364
BIRC2	21.1851	20.6163	19.6015	26.9328	21.5974	25.0748	12.3568	14.686	13.5569	10.0158	14.3549	11.6521
BIRC3	0.0252871	0.0510412	0.439539	2.0161	2.0249	2.38536	1.35284	1.29241	0.082684	0.0572106	0.193088	0.0947403
BIRC5	58.1121	50.993	8.85447	16.7001	35.2284	27.5968	28.5293	24.9605	74.0545	90.7634	45.3989	89.7753
BIRC6	10.7612	10.8811	8.18526	10.2464	8.19079	11.158	11.8809	11.5285	10.1167	8.86006	11.0062	3.38551
BIRC7	23.9367	23.0186	15.4116	8.69398	10.8027	2.65216	4.60328	1.60973	34.6845	7.58433	1.77478	33.4371
BIRC8	0	0	0	0	0	0	0.0342883	0	0	0	0	0
BIVM	5.16647	4.2209	5.51046	5.2664	4.01277	4.45417	4.13353	5.25406	8.5352	8.67149	9.47445	11.907
BIVM-ERCC5	4.29569	6.178	5.67562	4.42184	4.92919	4.17054	7.21117	5.90339	6.59407	8.51663	9.19963	2.63792
BLCAP	33.0815	33.0296	58.6425	40.5338	40.4455	33.4038	55.5653	54.7168	22.6016	31.9682	26.2868	23.0015
BLID	0	0	0	0	0	0	0	0	0.297772	0.072112	0.086965	0.596433
BLK	0.218923	0.155246	0.197107	0.0519173	0.182837	0	0.130629	0.0926242	0	0	0	1.08559
BLM	9.78503	10.4267	1.03326	1.69025	2.72404	3.49016	1.98946	1.22665	10.7281	5.24545	3.24234	4.53816
BLMH	28.0542	28.0575	20.5365	21.4245	28.3057	27.6237	21.6427	22.2848	17.7838	35.2064	42.4825	29.3545
BLNK	0	0	0	0	0.0431346	0	0	0	0	0	0	0.0310416
BLOC1S1	78.9281	62.364	106.554	81.9398	117.24	79.9311	86.4375	87.3272	101.354	120.738	83.769	119.789
BLOC1S1-RDH5	2.13598	1.40387	1.42351	2.93705	1.77746	1.3786	0.76997	1.21253	4.40773	4.5777	3.72549	3.55401
BLOC1S2	8.1954	7.91465	6.05389	6.143	8.00207	5.74192	8.59108	8.10856	4.97403	5.00347	4.72288	7.20931
BLOC1S3	7.0417	7.70783	9.76515	9.30612	8.44368	8.00155	8.97579	8.67034	6.13326	6.19865	8.26353	8.9761
BLOC1S4	4.74862	4.10084	7.84118	4.93836	5.16052	3.58188	5.80625	6.25784	6.24164	9.26375	7.67529	8.42233
BLOC1S5	0.402498	3.49554	6.01755	3.76424	1.88918	2.25118	1.60338	2.3416	5.49977	6.17942	6.07509	3.53826
BLOC1S5-TXNDC5	5.21454	6.56185	1.80811	2.62025	7.47566	2.4052	4.59873	3.74912	6.19946	7.56387	2.93163	1.3206
BLOC1S6	19.1217	18.8332	26.2867	20.8337	18.036	19.7732	14.2454	14.7256	25.5343	22.3222	23.4286	12.5184
BLVRA	30.8874	29.6532	29.4276	24.2583	35.289	27.6672	46.2787	49.5653	46.1353	34.7244	42.0087	59.9225
BLVRB	19.3876	18.0174	56.2618	29.1634	49.7631	32.233	43.9789	35.5055	59.4264	71.1018	82.6749	179.433
BLZF1	9.41415	9.36182	14.2101	10.9577	10.1891	9.96788	11.2347	11.3428	7.9246	10.9311	12.8307	4.10281
BMF	2.43085	2.82166	95.4416	78.2592	48.8189	53.2057	13.0287	12.2576	5.98994	29.4467	75.841	7.29196
BMI1	14.58	16.2732	19.8609	17.1016	16.768	12.8399	10.1843	9.0656	8.77035	13.1105	9.87471	4.76288
BMP1	20.7333	23.4551	161.33	139.462	90.012	73.0736	69.8879	71.0447	12.7317	21.6197	89.8225	24.2919
BMP10	0.0378513	0	0	0	0	0	0	0	0.0354957	0	0	0
BMP15	0	0	0	0	0	0	0	0	0	0	0	0
BMP2	0.0354617	0.0359246	0.279369	1.78706	1.73996	1.47989	1.50233	1.42533	0.0166274	0	2.60285	0
BMP2K	9.14956	8.654	14.1755	15.7796	11.3435	14.0184	7.24771	6.42956	5.10603	6.8874	8.79853	1.97489
BMP3	0.00944578	0.0191382	0.0318919	0.0560014	0.039444	0.0505374	0.0338172	0.0799284	0.0265738	0.0171611	0.0103479	0.113551
BMP4	0	0.0345994	0.0384388	0.0404989	0.356635	0.402106	3.62844	4.07763	0	0	0.112267	1.56571
BMP5	0	0	0.0298715	0.0629444	0.0554177	0	0	0	0	0	0.0290771	0
BMP6	0.0180065	0.0182409	0.101322	0.192155	0.0563921	0.0963362	0	0.0190453	0.422133	0.245349	0.670763	0.473564
BMP7	0.204737	0.262718	0.322585	1.00343	1.43916	0.598816	0.390925	0.230992	0.422389	0.508354	0.194385	0.584536
BMP8A	0.173411	0.204953	0.140951	0.456935	0.100574	0.474205	0.287423	0.203801	0.135516	0.665113	0.179419	0.854118
BMP8B	11.2549	10.4233	2.3225	4.75508	9.77864	12.7011	5.83366	2.30662	5.9978	13.92	7.92059	2.55115
BMPER	0.0541073	0.0548135	0.0608943	0.60308	1.03934	0.150534	7.6968	8.75629	0	0	0.011855	0.390265
BMPR1A	13.962	13.8806	13.4907	14.3407	14.1442	16.3653	13.008	13.8126	6.15894	6.98128	7.31231	1.54131
BMPR1B	2.48692	2.17359	2.3489	1.76943	1.83264	2.43742	0.709962	0.288838	0.0943167	0.0365385	0.160262	0.227152
BMPR2	4.78067	4.93672	10.4387	8.17936	7.66086	7.68749	13.27	12.1248	4.52444	5.84235	6.48629	2.02415
BMS1	16.4883	15.8468	9.11339	8.93058	9.47555	8.94995	11.7457	10.6782	8.24942	7.89431	7.73297	11.6177
BMS1P1	0.142577	0.1707	0.131287	0.35349	0.0947193	0.457696	0.139213	0.191937	0.0486197	0.035323	0.0567979	0.292154
BMS1P2	0	0	0	0	0	0	0	0	0	0	0	0
BMS1P4	0.832903	1.41634	1.30564	2.32794	1.149	2.86473	1.98794	2.86319	0.585802	0.405327	0.7821	1.78796
BMS1P5	0.0777501	0.10502	0.0583352	0.169018	0.013528	0.194126	0.0773212	0.109651	0.0486077	0.0117714	0.0567838	0.233665
BMS1P6	0	0	0	0	0	0.012421	0	0	0	0	0	0
BMX	0.0439134	0.0456689	0.0507361	0	0	0.0482389	0	0.0715287	96.3891	75.0227	7.4586	1.1518
BNC1	0	0	0	0.0140512	0.012371	0.0380406	1.34346	1.04033	0	0	0	0.00890335
BNC2	0.18066	0.145582	0.231046	0.053554	0.137164	0.0483288	0.568388	0.694867	4.31627	5.18816	2.9822	1.65659
BNIP1	12.2526	11.186	12.4474	10.3635	10.3701	7.7086	10.2413	10.7275	9.60103	9.41515	7.19167	13.4247
BNIP2	20.4967	22.9138	19.9683	18.3082	16.9202	19.1306	19.4767	18.7908	28.1966	22.4128	24.9025	6.85192
BNIP3	31.5372	28.3283	30.5869	25.0077	24.8464	21.0968	30.0431	25.091	20.9195	18.873	15.1879	36.1179
BNIP3L	7.43272	6.75911	18.4245	16.6495	15.6182	13.7531	20.7283	21.0374	26.662	39.3453	42.4665	24.8026
BNIPL	0.293753	0.405802	0.270491	0.506643	0.223029	0.656892	0.350559	0.423696	0.20115	0.194069	0.204786	2.08646
BOC	0.256243	0.155753	0.735383	0.957092	0.789145	0.356451	2.04883	2.24959	0	0.0232776	0.294752	0.182898
BOD1	33.2408	32.0559	32.5378	30.36	41.0686	26.1203	46.7251	50.2302	25.9928	19.1995	31.6708	42.0162
BOD1L1	7.50332	7.504	8.80276	9.19059	7.04192	9.3644	7.40464	7.16152	9.60926	9.61588	9.96909	14.0804
BOD1L2	0	0	0	0	0	0	0	0	0	0	0	0
BOK	1.75328	1.4296	4.66832	7.07349	6.58481	4.91906	12.0947	12.1447	17.6047	24.4924	8.43249	21.4784
BOK-AS1	0	0	0	0	0	0	0	0.177082	0.235498	0.152082	0.0917034	0.125786
BOLA1	8.07911	9.48113	12.9636	10.4334	11.7745	9.15864	9.54599	8.7147	14.8526	20.2006	13.6704	15.8063
BOLA2	0	0	0	0	0	0	0	0	0	0	0	0
BOLA2B	0	0	0	0	0	0	0	0	0	0	0	0
BOLA3	189.293	178.38	65.8705	60.4132	101.672	46.0483	87.6178	78.2138	116.467	103.253	42.9263	80.3319
BOLA3-AS1	8.73348	7.17844	5.30399	3.79575	5.19326	2.44232	5.13797	3.17093	3.27102	2.18067	2.50613	1.43297
BOLL	0	0	0	0	0	0	0	0	0	0	0	0.0152566
BOP1	135.247	133.792	35.7764	32.525	47.4916	26.955	28.0786	26.6699	45.8903	37.3434	28.9417	78.2927
BORA	7.46215	5.64391	1.48741	1.88054	3.16276	3.89454	2.9603	2.79585	2.5169	2.25339	0.913264	2.55121
BPESC1	0	0	0	0	0	0	0.01881	0.0333436	0	0	0	0
BPGM	9.83027	10.009	18.8928	27.704	23.155	21.1521	21.0633	19.8629	15.0952	16.4226	22.6604	11.92
BPHL	9.91102	10.4866	26.9981	16.5743	17.7842	12.0478	12.6914	10.5406	12.9195	13.4188	10.8872	15.6391
BPI	0	0	0	0	0.0332303	0	0.189933	0.168343	0	0	0	0
BPIFA1	0	0	0	0	0	0	0	0	0	0	0	0
BPIFA2	0	0	0	0	0	0	0	0	0.115528	0	0	0
BPIFA3	0	0	0	0	0	0	0	0	0	0	0	0
BPIFA4P	0	0	0	0	0	0	0	0	0	0	0	0
BPIFB1	0	0	0	0	0	0	0	0	1.76896	1.24623	0.263011	0
BPIFB2	0	0	0	0	0	0	0	0	0.0578667	0	0	0
BPIFB3	0	0	0	0	0	0	0	0	0	0	0	0
BPIFB4	0	0	0	0	0.0276807	0	0	0	0	0	0	0
BPIFB6	0	0	0	0	0	0	0	0	0	0	0	0
BPIFC	0	0	0	0	0	0	0.0350991	0	0	0	0	0.508251
BPNT1	22.0095	23.2581	25.5517	17.124	22.0106	16.9639	14.4724	14.5408	12.9568	14.5063	11.2825	7.54661
BPTF	11.6334	12.0253	17.0682	17.0118	12.8255	17.1248	13.8648	14.2648	15.8052	26.5368	32.7275	17.8179
BPY2	0	0	0	0	0	0	0	0	0	0	0	0
BPY2B	0	0	0	0	0	0	0	0	0	0	0	0
BPY2C	0	0	0	0	0	0	0	0	0	0	0	0
BRAF	4.47511	5.0544	6.32236	5.64504	6.06344	7.1931	8.9766	8.01664	9.28612	10.9847	9.42952	2.56107
BRAP	5.68545	5.96735	6.04485	6.66047	5.63575	6.02524	5.72476	5.57998	7.12593	8.9637	9.4924	7.17764
BRAT1	23.3561	25.2245	16.9727	16.6916	18.4618	15.9982	23.9448	24.7043	20.6296	25.3891	21.3291	36.5774
BRCA1	14.5746	14.3935	2.22052	3.3397	6.40772	5.91477	5.34745	3.86646	18.7927	13.2056	5.0988	9.88564
BRCA2	2.18153	2.21947	0.231322	0.509593	0.716876	0.879755	0.774885	0.538572	3.16283	1.74831	0.94674	0.663343
BRCC3	6.22309	5.43333	2.61507	2.43099	3.58141	4.24044	3.94134	4.04972	9.27184	8.45165	9.18901	7.16652
BRD1	13.0825	13.1331	17.8871	17.1721	15.5768	14.532	11.9747	11.981	17.3959	22.7879	25.9872	14.0801
BRD2	93.8516	99.716	97.3507	90.1178	82.0647	85.1762	77.058	82.5583	52.272	58.0272	64.9409	85.3598
BRD3	6.13404	6.59278	10.5709	11.5465	9.90568	11.5994	8.79572	7.99865	7.60382	10.1257	12.2218	7.60436
BRD4	35.1804	36.3211	30.5236	38.6291	31.2191	35.7907	34.0479	31.8882	29.6274	34.4518	35.3199	36.2396
BRD7	35.4193	31.3735	31.9844	27.7351	28.5305	29.3243	29.7176	30.0912	27.744	30.0103	24.4566	43.2353
BRD7P3	0	0.0699341	0	0.0818556	0	0.049246	0	0	0	0.0209033	0	0
BRD8	19.6038	18.0049	24.243	26.6453	21.6012	24.693	25.2258	26.157	19.0411	27.9939	23.5636	30.0487
BRD9	33.8254	32.8223	27.0082	25.5931	23.802	21.2482	19.0256	18.5516	14.3801	14.4906	12.4134	27.8284
BRDT	0.0895715	0.0453703	0.0840058	0.0885074	0.0467544	0.111821	0.0356309	0.0789517	0.0279991	0.0271223	0.0327087	0.145812
BRE	17.137	17.0659	24.8592	21.0643	22.2625	20.6318	24.8532	26.1648	24.7701	29.7277	35.4302	30.2135
BRE-AS1	0	0	0.0404034	0	0	0.0458218	0.128528	0.0379726	0.100998	0.0716481	0.117987	0.880271
BREA2	0.58911	0.5968	0.810341	1.31945	1.02501	1.26076	0.156229	0.692353	0.368299	1.0703	0.78879	2.16391
BRF1	12.1446	13.2464	11.7262	11.2167	11.3022	9.87185	11.2252	11.5329	13.4282	17.4016	18.0606	18.5826
BRF2	7.62001	7.39538	8.80497	8.24221	8.92657	6.5355	7.56641	7.59844	9.355	11.8286	16.9504	11.1444
BRI3	237.946	229.724	293.631	218.307	292.598	183.391	286.827	271.791	230.648	284.94	371.705	297.423
BRI3BP	17.5094	20.1657	2.36688	3.24763	5.15693	4.60548	4.20241	2.897	13.943	7.15305	6.05453	7.01864
BRICD5	3.97917	3.71118	3.48312	2.54637	1.78032	4.46068	3.54274	2.87275	3.13934	4.64745	3.59807	17.0365
BRIP1	3.65423	3.4095	0.59068	1.17465	1.6506	2.35877	1.51887	1.21437	4.68804	3.23012	1.50211	3.12016
BRIX1	55.7039	55.3915	14.298	15.0062	20.3024	18.6138	18.6599	18.4511	46.6928	23.0814	19.1637	53.3799
BRK1	71.8494	66.6355	105.598	92.7779	102.049	85.8533	99.7884	101.746	42.3318	51.3066	69.2332	66.8224
BRMS1	126.216	123.114	92.4209	75.0544	84.5042	52.1315	62.9104	55.2222	26.975	39.6496	32.4409	60.5622
BRMS1L	2.34838	1.95659	1.87724	1.79566	1.85589	2.74774	2.48821	2.55359	3.84876	3.94755	2.50053	2.53944
BROX	18.0704	17.4839	17.2389	17.4512	14.038	17.9767	21.9018	21.5401	13.7685	14.3954	12.9913	2.96995
BRPF1	12.4183	13.4241	8.68116	9.96866	9.61072	8.79965	8.42567	8.91939	5.474	6.13929	6.46183	5.29391
BRPF3	16.9749	17.0236	20.0134	18.957	15.7531	18.2889	15.4047	14.6505	7.27316	14.7106	15.0558	3.97249
BRS3	0	0	0	0	0	0	0	0	0	0	0	0
BRSK1	2.85998	2.98842	6.66012	10.1736	7.06051	9.7199	6.54702	6.39261	20.1065	2.90846	7.31062	9.33847
BRSK2	0.255162	0.31295	0.684431	2.43804	1.6922	2.28134	0.512902	0.340931	0.651779	0.394429	0.970307	2.71163
BRWD1	4.61414	4.59886	3.65863	4.72487	3.64716	6.67382	4.69789	4.70842	3.88335	3.09605	4.20455	2.42011
BRWD1-AS1	0	0	0	0	0	0	0	0	0	0	0	0
BRWD1-IT2	0.126783	0.321094	0	0.300664	0.0661779	0	0.22695	0.201152	0.178339	0.172755	0.208337	0.47628
BRWD3	1.82153	1.87053	1.41493	1.76135	1.43378	2.14005	1.55482	1.58436	4.3074	3.30183	3.46371	1.37481
BSCL2	4.42556	3.50008	11.1325	8.91882	7.87643	5.43376	14.5464	16.2954	8.17948	8.71834	10.444	19.2835
BSDC1	13.2584	13.6259	35.8387	36.0552	30.4636	28.6343	23.2906	23.8729	13.235	24.2881	30.8025	21.0388
BSG	430.023	419.085	767.231	558.371	631.32	405.571	686.606	746.492	379.941	470.254	459.432	342.122
BSN	0.152512	0.251906	0.272389	0.660459	0.439574	0.737928	0.154308	0.147288	0.0590737	0.150589	0.573875	0.179354
BSN-AS2	0.326605	0.374984	0.318563	0.619632	0.0909231	0.396082	0.259842	0.41455	0.367535	0.158234	0.166972	1.52141
BSND	0.0895964	0	0	0	0	0	0	0	0	0	0	0
BSPH1	0	0	0	0	0	0	0	0	0	0	0	0
BSPRY	0	0	0	0	0	0	0	0	0	0.0221317	0	0.018305
BST1	4.38019	3.77383	14.6967	19.7558	18.12	13.8859	18.8571	21.6064	0.115166	0.371867	0.134538	0.153784
BST2	3.90869	3.59974	103.896	2.78083	10.6835	4.41065	250.444	294.214	1.59947	1.93673	2.10207	4.05803
BSX	0	0	0	0	0	0	0	0	0	0	0	0
BTAF1	9.37574	9.84647	5.83058	7.46586	5.43239	8.48718	6.59292	7.36296	5.58921	4.90054	3.96784	2.02086
BTBD1	24.8843	24.0624	25.9904	17.4675	18.6411	19.2159	21.1685	20.8887	44.2792	43.0614	34.6213	17.0718
BTBD10	14.6457	13.8034	15.2581	15.5919	14.9345	13.3185	12.6891	12.2059	18.2415	19.668	13.1883	14.0188
BTBD11	0	0	0	0	0	0	0.0112197	0	0.0132531	0	0	0.0212367
BTBD16	0.0635461	0.0321878	0.393344	0.565121	0.530715	0.543981	0.151669	0	0.148979	0.519529	1.46192	0.907141
BTBD17	0	0	0	0	0	0	0	0	0	0	0	0.0266253
BTBD18	0.147062	0.0930325	0.10345	0.153003	0.0767466	0.275318	0	0.0194271	0.0517764	0.0166858	0.0606149	0.0690047
BTBD19	1.06913	1.16045	1.76189	4.34647	2.15254	6.08787	4.32888	6.7851	0.537106	0.624345	1.21307	2.23769
BTBD2	30.3586	32.2893	66.1173	48.5955	46.1956	36.8846	47.643	48.5214	22.6659	35.1062	50.3019	41.2131
BTBD3	30.077	28.2795	23.4989	23.3519	24.7747	27.7838	16.7461	13.4183	20.8824	22.7642	16.6333	5.60737
BTBD6	25.5169	24.5441	22.618	19.2099	23.5496	18.2134	20.6272	19.1501	24.2586	36.4327	31.1633	29.1427
BTBD7	6.05432	6.16748	6.7701	6.62873	6.29803	6.98905	7.30258	7.81536	3.38955	4.16228	5.28462	2.99961
BTBD8	0	0	0.284682	0.399917	0.352096	0.270673	0.503114	0.17837	0.593027	0.689349	0.461852	0.158376
BTBD9	2.58816	2.42918	4.4443	3.76513	3.24883	2.95645	3.34553	3.48224	1.46679	2.60551	3.00573	1.24626
BTC	0	0	0	0	0	0.0499498	0	0	0.306423	0.127212	0.869346	0.105216
BTD	11.8728	10.8904	21.2278	19.3034	16.5849	12.3742	15.4417	14.1614	5.92232	13.3095	9.53216	5.12452
BTF3	502.283	470.726	435.352	271.956	359.083	261.439	347.751	358.903	340.757	279.856	294.887	412.063
BTF3L4	7.92171	6.84061	5.83066	6.35474	7.87426	8.55965	7.16831	8.04341	8.69708	6.06972	6.45781	5.77309
BTF3P11	0	0	0	0	0	0	0.142969	0	0	0	0	0
BTG1	20.3292	18.4547	50.4079	28.2151	29.4342	17.3452	34.9702	33.0441	25.4881	47.7367	49.3102	25.6028
BTG2	1.77033	1.39255	11.6027	12.9407	8.87109	10.6752	5.7912	5.48538	3.51562	3.27309	4.60893	1.23621
BTG3	33.7012	32.376	13.1448	17.0576	27.2665	28.422	15.8916	14.4279	18.3597	10.3434	11.9583	13.5163
BTG4	0	0	0	0.0764651	0.0673217	0	0.0769575	0	0	0	0	0
BTK	0.108506	0.0439691	0.390775	0.128661	0.0906209	0	0.0517958	0.022954	0.244209	0.374557	0.285287	0.0815245
BTLA	0	0	0	0	0	0.0194922	0	0	0.0512532	0	0.0199561	0.0651709
BTN1A1	0.0394524	0	0.0222006	0.0467805	0.0205933	0.0211081	0.0235409	0	0	0.0358387	0	0
BTN2A1	12.811	14.0761	14.4511	14.6828	11.6798	11.8632	9.2354	11.3957	15.3962	11.4189	9.4901	10.5322
BTN2A2	8.23239	9.12867	5.42228	4.14496	5.57884	4.98357	3.643	3.85945	7.06547	3.21377	3.74456	2.76072
BTN2A3P	1.10017	0.905553	1.23817	1.79371	0.933178	1.47155	0.90263	1.38186	0.601825	0.562159	0.451965	0.551061
BTN3A1	10.0279	10.8743	14.0312	10.0292	10.3661	7.11682	16.7296	19.0504	6.06984	3.35929	3.2833	3.76725
BTN3A2	18.6475	18.3414	10.1956	7.28597	12.2078	6.86768	27.7397	30.182	12.2739	4.50104	4.76482	9.04413
BTN3A3	2.04637	2.31998	3.30098	3.2111	4.03607	2.81591	11.6534	12.0508	1.43559	0.973771	2.04829	1.9408
BTNL10	0	0	0	0	0	0	0	0	0	0	0	0.0566311
BTNL2	0	0	0	0	0.0468478	0	0	0	0	0	0	0
BTNL3	0	0	0	0	0	0	0	0	0	0	0.025592	0
BTNL8	0	0.0378485	0	0	0	0	0	0	0	0	0	0
BTNL9	0	0	0	0	0	0.0169582	0.0567381	0.0335257	0	0	0.0173616	0.178607
BTRC	4.46056	4.28804	4.87342	4.27693	3.59846	4.33908	5.08127	4.29622	3.42407	3.8891	4.11771	3.38983
BUB1	31.2492	28.9936	3.38677	6.53555	14.6827	14.2702	13.2309	10.973	46.8307	34.1131	15.9456	16.41
BUB1B	34.1338	31.3337	3.22047	6.878	14.2507	13.4905	9.74707	6.53046	49.2195	45.1294	20.815	23.5562
BUB3	92.1245	87.7226	38.6683	43.5957	63.3578	57.1761	53.2398	49.6383	56.2445	48.3167	33.8216	51.7684
BUD13	8.70313	9.85918	6.65166	5.13566	6.86407	5.10924	4.26578	4.74679	8.53949	9.67023	7.26198	12.4091
BUD31	66.9158	64.3201	53.9519	51.0111	67.7245	49.0319	81.3557	81.4589	81.5034	82.797	76.3203	115.623
BVES	4.53292	5.08825	4.71647	8.96262	7.53941	12.1011	4.96487	3.38944	6.52944	4.54781	9.10023	3.15554
BVES-AS1	0.483656	1.01494	0.388803	0.901203	0.540982	0.406636	0.49473	0.511576	1.0043	0.784561	0.492002	0.571036
BYSL	34.9793	32.2952	15.5032	15.7791	18.8996	14.6777	15.1826	14.2611	21.53	20.1651	24.0621	32.5657
BZRAP1	0.0142851	0.0506234	0.0803289	0.160887	0.0521406	0.0457987	0.144855	0.143519	0	0	0	0.00540072
BZRAP1-AS1	0.130498	0.211784	0.176521	0.0619982	0.10913	0.0838909	0.436854	0.885072	1.39775	0.783715	0.486741	0.451585
BZW1	93.7188	87.7946	48.1922	48.8521	62.7174	61.1662	85.4182	94.5608	149.059	107.38	113.238	60.2811
BZW2	141.235	139.362	62.9498	71.4648	82.2466	70.2403	67.1566	69.7556	87.6483	82.268	78.9053	114.79
C10orf10	1.04132	0.655757	5.06785	11.3796	9.54881	8.58288	21.8982	19.5876	5.04094	3.91158	2.46654	7.5489
C10orf105	0	0	0	0	0	0.0123237	0	0.0243611	0	0	0	0.00862784
C10orf107	0	0	0.112188	0.236401	0.0520332	0.160001	0.416365	0.421755	0	0	0	0
C10orf108	0.0198311	0.0507841	0.0787364	0.36644	0.0414045	0.0424406	0	0.0419517	0	0.0360292	0.0331924	0.257998
C10orf11	8.52959	7.79978	24.0413	17.7217	21.1975	17.7696	15.0434	10.1397	3.61006	4.59412	7.77307	8.56365
C10orf111	0.0691852	0.0700883	0	0.20509	0.10834	0.259111	0.0825642	0.146358	0	0.031424	0.151586	0.155943
C10orf113	0	0	0	0	0	0	0	0	0	0	0	0
C10orf114	0.673055	0.741131	1.7455	1.17976	1.25253	0.688891	2.68901	3.31192	0.493958	0.611405	1.6029	3.75968
C10orf116	1.40556	0.897495	0.736217	0.794051	0.815618	1.55258	2.2122	1.85683	0.699563	0.8111	0.855892	1.5221
C10orf118	1.47081	1.36802	2.24834	2.89647	2.45135	4.1693	3.3257	3.79375	1.53253	1.51579	2.42163	2.06796
C10orf12	4.83725	4.96135	2.6543	2.21155	2.1104	2.52368	2.95814	3.15644	2.25683	2.17522	1.3314	0.768465
C10orf120	0	0	0	0	0	0	0	0	0	0	0	0
C10orf126	0.161136	0.136033	0.0604495	0.159222	0.0560731	0.0287373	0.128198	0.0284063	0.176293	0.0975842	0	0.121067
C10orf128	13.0445	14.6831	4.89359	3.43721	7.56551	2.48148	2.76748	1.83967	0	0	0	0
C10orf129	0	0	0	0	0	0	0	0	0	0	0	0
C10orf131	0.429997	0.163347	0.120966	0	0.0561073	0	0.128267	0	0.0503953	0.0488169	0.0588767	0.0807575
C10orf137	7.38515	7.54453	4.98978	4.2689	4.60074	5.10002	3.63465	3.88741	3.15162	2.61387	2.30787	1.32737
C10orf2	23.4766	21.792	12.3964	11.1643	11.7779	8.92096	7.81415	8.05466	10.0434	9.81192	9.37433	10.7565
C10orf25	0.243115	0.228697	1.11399	0.844227	0.779535	0.761857	0.746046	0.495931	0.879373	1.23043	1.33167	1.74832
C10orf32	3.37569	3.15778	6.55786	7.67075	6.37154	8.10735	6.08604	6.98359	2.02301	3.12468	3.99402	5.41277
C10orf32-AS3MT	1.60447	0.614707	1.74619	1.90363	1.41537	1.88238	1.8292	1.55181	0.132607	0.151759	0.39124	0.771464
C10orf35	0.29951	0.303419	0.471911	0.284114	2.06366	2.43573	5.14698	5.25887	3.0334	2.93841	2.62492	4.36561
C10orf40	0	0	0	0	0	0	0	0	0	0	0	0
C10orf47	7.77934	7.30588	11.2915	19.0425	27.5183	32.6541	3.068	1.81873	5.47923	4.6859	5.76079	2.28276
C10orf53	0	0	0	0	0	0	0	0	0	0	0	0
C10orf54	0.0685801	0.0231584	0.41164	1.97875	1.96885	1.46769	3.92842	3.53023	0.761027	0.186895	0.313041	3.70132
C10orf55	0	0	0	0.080473	0.165317	0.0242071	0.161982	0.167498	0	0	0.0247829	0
C10orf62	0	0	0	0.119339	0.0525344	0	0	0	0	0.137139	0.110257	0.34028
C10orf67	0.0381417	0	0.021463	0	0.0398183	0.122441	0	0	0	0	0.0208922	0
C10orf68	0.0415388	0.042081	0.0490771	0.100215	0.0216824	0.209765	0.0991431	0.0909084	0	0.0188672	0	0.0316474
C10orf71	0	0	0	0	0	0	0	0	0	0	0	0
C10orf76	11.7284	11.4877	12.4604	11.364	11.8522	10.9006	11.773	11.2287	5.21645	5.54015	6.72531	4.07868
C10orf82	0	0.133965	0.372067	0	0	0	0	0	0	0.0600631	0.144869	0.0496778
C10orf88	3.04387	3.34057	3.09943	3.63074	2.72372	3.56731	2.50815	3.23875	3.46611	2.02442	2.12381	2.42309
C10orf90	22.4979	23.7841	40.2056	38.7028	40.3065	48.3032	6.71214	3.51192	17.763	14.2401	48.995	9.58315
C10orf91	0	0	0	0	0	0	0	0	0.275187	0.26657	0.214317	0.293971
C10orf95	0.495508	0.501978	0.41825	0.293773	0.0862148	0.26511	0.147832	0.21838	0.116168	0.41261	0.22618	0.248194
C10orf99	0	0	0	0	0	0	0	0	0	0	0	0
C11orf1	2.81262	4.54537	5.42645	2.54099	3.07608	1.64814	4.07578	3.75415	25.3711	27.8616	19.6613	26.9183
C11orf10	332.768	326.889	536.636	317.098	355.561	240.806	215.871	212.147	237.061	389.375	279.147	231.254
C11orf16	0.121422	0.0614953	0	0	0.0316857	0	0.0362208	0.0642071	0	0.0275857	0	0.0684122
C11orf20	0.0967297	0.195985	0.217726	0	0.100982	0.414023	0.461741	0.306941	0.54426	0.263608	0.211936	0.436057
C11orf21	0	0	0	0	0	0	0.442318	0.67207	0	0	0	0.0596684
C11orf24	95.7182	95.0438	94.5611	85.6614	79.0384	60.2526	34.5509	29.2844	47.7712	47.4503	66.7208	45.1389
C11orf30	16.4668	17.1703	12.4288	13.3165	11.2618	11.6065	7.96383	7.83939	5.6027	4.54209	4.84145	1.93753
C11orf31	53.3851	50.0036	86.4007	48.7555	60.4843	35.9469	37.0586	35.6337	46.5575	62.0334	65.3088	66.2855
C11orf34	0	0.0791572	0	0	0	0	0	0	0	0	0	0.0880607
C11orf35	0.33095	0.391148	0.589733	0.457826	0.518246	0.472178	0.592423	1.07933	0.801748	1.20254	1.20853	4.47576
C11orf39	0	0	0	0	0	0	0	0	0	0	0	0
C11orf40	0	0	0	0	0	0	0	0	0	0	0	0
C11orf42	0.389395	0.507186	0.187817	0.197881	0.232293	0.297624	0.13277	0.117678	0.104332	0.0505325	0	0.041795
C11orf44	0.0156346	0.174225	0.0703828	0.185386	0.0326436	0.083649	0.0746319	0.0661484	0.0439847	0.0568099	0.0513833	0.411137
C11orf45	0.0311407	0.110433	0.210323	0.0738597	0.146315	0.0333226	0.345205	0.322069	0.342655	0.442559	0.583827	0.128706
C11orf48	70.4887	73.9219	46.5132	31.801	40.0186	26.9953	24.3534	23.1198	33.1388	31.8885	33.124	74.834
C11orf49	16.1343	14.7007	26.4043	28.5172	22.6149	17.8315	22.267	24.3301	12.8799	15.7743	18.739	16.4798
C11orf52	0.0558038	0.113065	0.247035	0.463201	0.466071	0	0.066596	0.17708	0	0.405553	0.80531	0.143242
C11orf53	0	0	0	0	0	0	0	0	0	0	0	0
C11orf54	1.81604	1.71871	3.54982	3.96671	4.31559	4.70473	2.28129	2.27472	6.90171	6.40341	8.24587	4.12925
C11orf57	3.48717	3.71288	4.38937	3.95966	3.45833	4.23668	3.28453	2.94775	9.289	8.6769	10.2934	12.7116
C11orf58	47.2689	45.1952	46.021	42.9101	42.2848	34.4159	24.3171	22.4748	27.1256	32.1196	30.8397	21.0781
C11orf63	1.69529	1.91655	3.53924	2.64719	2.25427	2.57054	3.52707	3.77518	2.62075	2.79618	3.77137	3.7528
C11orf65	0	0	0.0709126	0	0.0657787	0	0	0	0.413614	0.22895	0.20708	0.426067
C11orf68	44.9335	40.2974	102.461	120.327	89.4904	56.8205	53.9609	55.3369	15.7666	23.1764	35.6461	53.4367
C11orf70	0.157176	0.159228	0.517182	0.733076	0.32351	0.224249	0.281357	0.415624	0.196526	0.0951862	0.200886	0.944734
C11orf71	0.451596	0.733876	2.23933	1.82454	0.850063	0.775168	0.972863	1.24443	3.72176	5.58204	6.34284	5.22623
C11orf73	9.64487	8.75989	8.50611	8.06535	8.82524	9.68965	10.0161	9.1787	25.341	23.2167	21.5731	26.2381
C11orf74	4.49418	5.06825	16.987	17.1934	12.4818	13.429	11.9408	9.5969	4.53257	5.62309	8.63917	9.0468
C11orf75	5.68354	5.07228	4.49275	2.96847	3.17859	2.53404	2.09938	3.07738	14.1494	7.12977	5.18863	12.099
C11orf80	7.84954	7.63644	7.5451	7.62747	7.97616	7.27238	3.88692	3.82291	3.34454	3.12875	2.87504	3.99678
C11orf82	3.38805	3.92035	0.227383	0.331709	1.03838	0.947925	0.630596	0.558915	9.66279	4.88481	3.0306	4.06355
C11orf83	8.52631	8.24361	12.0874	7.94613	10.7126	5.21806	6.24789	6.45535	5.55491	11.2783	9.99611	26.8607
C11orf84	34.7539	34.2739	30.1798	22.9136	23.9912	17.5922	16.2492	12.7355	23.8927	26.6824	20.8116	33.4606
C11orf85	0	0	0.0919973	0.0969272	0	0	0	0	0	0	0	0
C11orf86	0	0	0	0	0	0	0	0	0	0	0	0.440063
C11orf87	0.00911131	0	0	0	0	0	0	0	0	0	0	0.0479194
C11orf88	0	0	0	0	0	0	0	0	0	0	0	0.076945
C11orf9	0.762875	0.918777	2.06168	2.29823	1.20424	1.54817	1.19526	0.972141	3.70657	4.38311	1.94026	2.10964
C11orf91	6.94963	5.8291	26.3235	32.5189	16.8506	14.8729	2.31863	1.26465	1.33146	2.10435	3.76575	3.70557
C11orf92	0.09865	0.0799501	0.133229	0.116974	0	0.0633364	0.0706361	0.0730413	0.0462554	0.0806525	0.0324215	0.200121
C11orf93	0.117908	0.238897	0.596633	0.209716	0.124895	0.0424404	0.633204	0.249172	0.153053	0.108729	0.0645834	0
C11orf94	0.631687	0.319966	0	0.37451	0	0	0.753842	0	0.888562	0.286913	0.692017	1.42382
C11orf95	6.29386	7.17302	18.1675	12.3115	9.75439	9.55131	5.86504	6.2257	3.1879	4.31449	7.19289	2.72197
C11orf96	12.4545	14.2649	9.67577	5.73083	7.61684	2.3372	6.93236	7.32407	19.3495	1.26646	18.0223	2.72345
C12orf10	48.2046	50.7181	49.6576	36.0839	45.9547	31.5128	47.353	53.8291	39.8751	35.8574	37.1867	92.3494
C12orf23	7.62484	6.88839	12.3147	12.1331	12.0089	14.499	13.3929	13.0576	12.1339	13.0882	14.1206	7.25399
C12orf28	0	0	0	0	0	0	0.0253915	0.0900209	0	0	0	0.0159861
C12orf29	4.42139	4.51874	1.71738	2.25016	2.69592	3.14013	1.98449	2.3797	5.66897	3.92754	4.22213	3.71881
C12orf36	0	0	0	0	0	0	0	0	0	0	0	0
C12orf39	2.75639	2.09427	3.56746	1.47077	1.87041	1.17979	0.164471	0.437325	0.51697	0.375586	3.62357	0.724837
C12orf4	15.88	14.5942	10.6679	10.4343	11.57	12.6013	9.39787	9.33832	5.78598	5.22415	5.23959	5.73219
C12orf40	0	0	0	0	0	0	0	0	0	0	0	0
C12orf42	0	0.0472433	0	0	0	0	0	0	0	0.127095	0	0.035037
C12orf43	8.40142	9.00448	7.57106	6.5691	7.65849	5.56987	7.1563	7.30874	8.36385	9.01445	8.7036	10.2689
C12orf44	74.9765	73.3864	46.2613	43.9528	57.7313	47.8239	41.4665	33.4768	43.9184	36.0161	43.2693	67.2694
C12orf45	13.8707	12.1528	10.8289	6.51956	6.26179	3.74401	8.94755	5.55133	23.3197	16.1191	11.773	39.6204
C12orf49	21.8408	22.1876	18.2238	14.599	14.9955	14.5877	13.0685	10.8953	22.5583	21.5382	18.763	6.41123
C12orf5	5.14216	4.8532	4.75427	3.70468	3.9548	4.01186	4.47424	3.93122	3.27173	2.55435	3.60101	2.82669
C12orf50	0	0	0	0	0	0	0	0	0	0	0	0
C12orf52	21.9446	24.2184	14.7061	9.42266	13.3637	7.89846	22.1013	22.0157	20.5789	17.186	18.8317	29.3032
C12orf54	0	0	0	0	0	0	0.0910005	0	0	0	0	0
C12orf55	0.0148311	0	0.0166914	0.0527577	0	0	0.0530974	0.17256	0	0.0134726	0	0.111431
C12orf56	0	0	0.127335	0	0.196862	0.403567	0.675119	0.877619	0	0	0	0
C12orf57	80.5841	73.3631	159.535	115.467	186.751	112.279	175.97	213.66	147.67	94.7577	96.5514	212.314
C12orf60	1.18844	1.08929	3.75776	3.5565	3.48571	2.36171	1.95854	2.09506	2.54737	3.70141	4.64978	2.97637
C12orf61	0.28235	0.214527	0.317767	0.544043	0.368452	0.339896	0.294832	0.261318	0.198584	0.256488	0.463975	0.556865
C12orf65	8.10834	9.215	6.99426	9.28157	8.00195	8.59831	6.83628	6.65809	10.4375	10.0174	12.841	24.5135
C12orf66	2.09289	2.03186	1.88924	1.83537	1.75246	1.77294	1.76914	2.09841	3.74129	2.05962	2.00618	1.01554
C12orf68	0.414951	0.148365	5.43918	7.5251	4.10257	4.7275	3.99068	3.38214	0.0457797	0.354769	2.37987	0.696889
C12orf69	0	0.0278509	0.618811	0.68457	0.401808	0.529523	0.459319	0.31987	0.0257812	0.0499477	0.361413	0.14459
C12orf70	0	0.0495473	0	0	0	0.0523351	0.0583668	0.310393	0	0	0	0.11024
C12orf71	0.0685491	0.0694438	0	0	0	0.0733511	0	0.0725062	0	0	0	0.360522
C12orf73	3.78615	3.48042	3.23526	3.53333	3.5134	4.42651	2.55201	2.74397	3.78065	3.88519	3.8021	2.89734
C12orf74	0	0	0	0	0	0	0	0	0	0	0	0
C12orf75	12.317	10.5651	11.7877	43.8143	62.0394	37.471	91.2507	92.5747	24.7028	17.0281	39.0518	35.598
C12orf76	0.509755	0.637917	2.26104	1.91998	1.28345	1.70057	0.500979	0.666047	3.48682	4.57615	4.86171	6.03782
C12orf77	0.119439	0.161331	0.179228	0.283249	0.0415632	0.383419	0.142536	0.505336	0.186677	0.180831	0.174462	0.867474
C13orf35	0	0	0	0	0	0	0	0	0	0	0	0.0192665
C13orf45	0	0	0	0	0.0565671	0.0579811	0.0646636	0.0573132	0	0.049222	0	0
C14orf1	18.0632	17.8237	26.3573	23.8755	27.1022	21.7133	30.1415	29.1138	20.4956	28.2002	22.9579	16.509
C14orf101	2.94627	2.99776	6.24072	5.50725	4.80842	5.30032	4.60613	4.69493	4.9105	6.2644	6.52578	3.62494
C14orf105	0.294218	0.18342	0.203768	0.429375	0.165389	0.557005	0.405131	0.406956	0.106118	0.0616773	0.123968	1.1903
C14orf119	8.72821	8.41728	11.41	9.17424	11.2405	8.68696	13.2814	14.3115	10.5975	12.2391	11.8581	12.5857
C14orf132	0.0424734	0.0645417	0.286807	0.789014	1.21936	1.04532	1.63043	1.78952	0.152682	0.160762	1.16325	1.26583
C14orf142	3.92297	4.08337	2.47969	2.54884	3.19779	3.33522	3.20674	2.95576	4.78773	3.41718	2.41374	5.85453
C14orf159	1.82301	2.12123	3.36368	4.61636	4.85154	2.31148	12.1807	15.038	5.5004	11.4054	3.71548	8.42606
C14orf164	0	0	0.0776572	0	0	0.0738356	0	0	0	0	0	0
C14orf166	78.8759	72.7209	74.6805	63.0337	82.4719	82.4877	80.3665	77.2975	131.51	144.142	395.766	222.499
C14orf166B	0	0	0	0	0	0	0	0	0	0	0	0
C14orf169	10.41	10.663	6.82118	5.04715	6.9311	5.89142	5.74222	4.40437	8.98117	11.4948	12.2659	8.29065
C14orf177	0	0	0	0	0	0	0	0	0	0	0	0
C14orf178	0.365549	0.37032	0	0.288834	0.381636	0.782919	0.581848	0.515773	0.114384	0.553702	0.266817	2.75023
C14orf180	0	0	0	0	0	0	0	0	0	0	0	0.0238867
C14orf182	0.252546	0.170562	0.0710562	0.424229	0.241677	0.427877	0.175807	0.289385	1.34204	0.707359	2.72055	2.4667
C14orf183	0	0	0	0	0	0	0	0	0	0	0	0.050902
C14orf2	118.425	115.601	93.6695	56.8222	87.7525	58.2552	89.3217	88.9082	228.352	228.655	139.203	284.698
C14orf23	0.106711	0.0360346	0.0400322	0.063266	0.018567	0.0570932	0.0212245	0.0188118	0	0.0323122	0.0389675	0.120263
C14orf28	0.38664	0.274181	0.935548	0.756453	0.544908	0.475784	0.669042	0.69523	0.525738	0.684888	0.529458	0.421218
C14orf37	4.28335	4.59667	25.7373	12.8265	8.6401	7.5937	2.38255	1.88135	0.272324	1.8136	4.67255	0.995466
C14orf39	0	0.0413574	0.0229727	0.0484075	0.149167	0.218422	0.0974384	0.129544	0	0	0	0
C14orf64	0.083309	0	0	0.0493916	0.0434855	0.089145	0.0497096	0	0	0	0	0.156482
C14orf79	1.70398	1.47514	3.1381	3.63688	3.75184	2.45324	5.10224	6.8817	3.66074	5.26287	5.43048	7.07635
C14orf80	9.98124	9.61203	5.06249	5.66235	7.93275	6.83088	5.49332	5.33981	21.1666	21.8709	11.8891	39.0426
C14orf93	4.28522	4.63045	4.93428	4.29527	5.20218	4.65852	5.03967	4.7791	5.90318	6.26406	5.01929	7.38923
C15orf23	34.9952	26.5597	8.51711	12.0046	16.6789	15.2962	11.3995	7.43548	38.6282	38.825	29.9199	34.7559
C15orf26	0.0380998	0.0385971	0	0	0.0397745	0	0.0454675	0	3.17986	0.17305	0.0834771	0.0572512
C15orf27	0.0237973	0.0482158	0.160694	0.366827	0.22359	0.381965	0.0851975	0.100684	0.0669489	0.043235	0.15642	0.107278
C15orf32	0	0	0	0	0.071657	0.0734481	0.0409566	0	0	0	0	0
C15orf37	2.73548	2.42067	7.56727	4.18406	3.68375	2.5866	3.28259	3.40906	6.11367	7.19327	11.8709	2.44243
C15orf38	10.0298	9.51983	11.3495	9.03567	9.28215	10.0975	12.4676	11.0654	0.0536225	0.0705932	0	0.021481
C15orf38-AP3S2	6.38779	5.74871	5.75685	6.68406	6.8791	4.5403	7.09658	7.90271	0	0.223901	0.141032	0
C15orf39	11.8002	12.2926	3.98133	3.79868	6.46937	3.79864	8.96002	7.32661	17.5499	13.8318	14.7972	11.7004
C15orf40	20.3005	20.9128	16.6269	18.1449	16.4598	16.0404	19.8383	16.4049	26.4268	29.5286	28.83	25.5008
C15orf41	8.39478	8.4491	5.1564	5.21573	5.50323	4.50446	5.38172	4.84858	7.85546	7.27511	4.3893	3.25232
C15orf43	0	0	0	0	0	0	0	0	0	0	0	0
C15orf48	0	0	0	1.75568	5.91264	0.149249	7.66281	10.0666	0.392716	0.0747196	1.21472	0.784916
C15orf52	8.72795	9.01747	25.5667	48.2032	28.5057	41.187	16.7553	16.5439	4.13064	5.64071	15.046	25.6482
C15orf53	0	0	0	0	0	0	0	0.0901309	0	0	0	0
C15orf54	0.0363248	0.0183995	0.143084	0.21536	0.0948038	0.0583042	0.0216746	0	20.9154	4.19069	5.989	4.33943
C15orf55	0	0	0	0	0	0	0	0	0	0	0	0.0327869
C15orf56	0	0	0.0612048	0	0.0567736	0	0.0973495	0.0862836	0	0	0	0
C15orf57	11.434	12.3062	17.2009	11.4367	14.2132	9.59881	15.868	15.2819	12.5057	17.8857	18.3915	16.9717
C15orf59	0.366559	1.06761	8.40548	5.21575	8.56229	1.61798	3.71828	4.60417	0.0429684	0.665967	2.71058	0.791798
C15orf60	0	0.0738126	0	0.0857848	0	0.0779395	0	0.0771147	0	0	0	0
C15orf61	3.44089	2.80802	3.65737	2.09668	3.09324	2.1478	3.36488	2.83074	9.76991	8.81278	8.42907	7.3608
C15orf62	0.25146	0.370533	0.257274	0.650546	0.167054	0.733841	0.354668	0.459432	0.257248	0.166151	0.150259	0.37786
C16orf11	0	0	0.0292037	0	0	0	0	0	0.0243339	0.023572	0	0.0194962
C16orf13	78.0361	72.213	55.2687	49.5987	64.8859	48.0448	61.5604	60.2656	68.319	68.9125	65.0755	176.08
C16orf3	0.264478	0.468878	0.0744133	0.235203	0	0.212254	0.631246	1.11898	0.372028	0.120126	0.434606	0.496778
C16orf45	4.76739	4.09731	15.7931	58.9972	55.4733	51.8617	51.9639	57.2846	0.24181	0.491594	1.10111	2.19362
C16orf46	0.515029	0.406078	0.328402	0.862997	1.15596	0.706922	1.82166	2.06371	0.732645	0.902253	1.22303	1.50304
C16orf47	0.23657	0.28759	0.212996	0.112205	0.246969	0.151885	0.112927	0	1.06487	1.24642	0.570161	0.462132
C16orf52	3.60879	3.48121	2.24559	2.23448	2.39161	3.03129	2.17538	2.00627	8.07359	3.30061	3.58914	3.10007
C16orf54	0	0	0	0	0	0	0.416616	1.03854	0	0	0	0.0163934
C16orf55	1.49919	2.31811	2.22006	2.02715	2.88306	2.89884	3.67237	4.08952	1.06058	2.86709	2.42034	6.0667
C16orf58	19.6417	18.7823	48.8019	36.5675	38.2208	33.5671	34.6123	36.2223	30.3163	45.6161	50.0736	30.5569
C16orf59	19.7715	19.9181	2.64211	4.21903	7.85031	5.80921	5.42813	3.49193	16.5115	16.4276	7.71554	24.9695
C16orf62	0.877663	0.803075	4.15812	3.44097	2.34972	2.1055	2.11166	1.63206	26.4436	31.7494	26.7045	14.6454
C16orf70	8.99306	9.51179	9.09563	9.41862	8.41645	8.49965	8.46279	9.17697	6.76158	7.19764	8.18103	4.37554
C16orf71	0.0417546	0.0634494	0.0939843	0.0742655	0.0653851	0.111699	0.0996582	0.220825	0.0391561	0.132755	0.18297	0.439203
C16orf72	11.6924	11.1441	12.7853	12.568	12.2063	12.008	13.8709	13.5821	11.3021	12.6954	12.3998	10.9993
C16orf74	2.25797	2.13494	4.57416	2.40964	3.22154	1.44969	1.79641	1.59221	3.38792	3.76043	3.05079	14.0808
C16orf78	0	0	0	0	0	0	0	0	0	0	0	0
C16orf80	37.0636	36.0883	30.2039	25.2188	36.2369	31.9026	20.9123	16.9101	58.6637	65.3747	101.193	42.2395
C16orf82	0	0	0	0	0	0	0	0	0	0	0	0
C16orf86	0.637606	0.745302	3.58793	2.20996	1.58728	1.52199	1.99006	2.02324	0.873892	2.18315	1.397	2.76378
C16orf87	5.53803	5.96938	5.83381	5.83122	6.84526	9.14972	4.17687	3.13974	4.90255	6.92233	8.49373	4.59364
C16orf88	27.8526	28.3374	15.084	11.5999	14.0856	9.79587	13.6025	11.1386	33.1892	21.3064	12.6836	64.1284
C16orf89	0.153361	0.0310726	0.621364	0.400064	0.737624	0.0415557	0.0366037	0.097331	0.143817	0.0835907	2.05176	0.714398
C16orf90	0	0	0	0	0	0.0798478	0	0	0.0699766	0	0.0817472	0.0560648
C16orf91	8.1334	7.9344	8.40777	7.85819	8.23934	5.2219	6.68652	5.86272	9.15268	9.41337	7.12815	12.6744
[truncated: 23,223 more rows]
